# Supplementary material for: Global patterns and drivers of soil dissolved organic carbon concentrations
Source: Copernicus journal article supplement (doi:10.5194/essd-2024-343), 2024-08-29
Supplement: Supplementary file 1 [file essd-2024-343-supplement.pdf]

1 *Supplement of*  
2 Global pattern and drivers of soil dissolved organic carbon  
3  
4 Tianjing Ren et al.  
5 Correspondence to: Andong Cai (caiandong@caas.cn)  
6

7 **Fig. S1** PRISMA flow diagram showing the procedure used for selection of studies for synthesis.

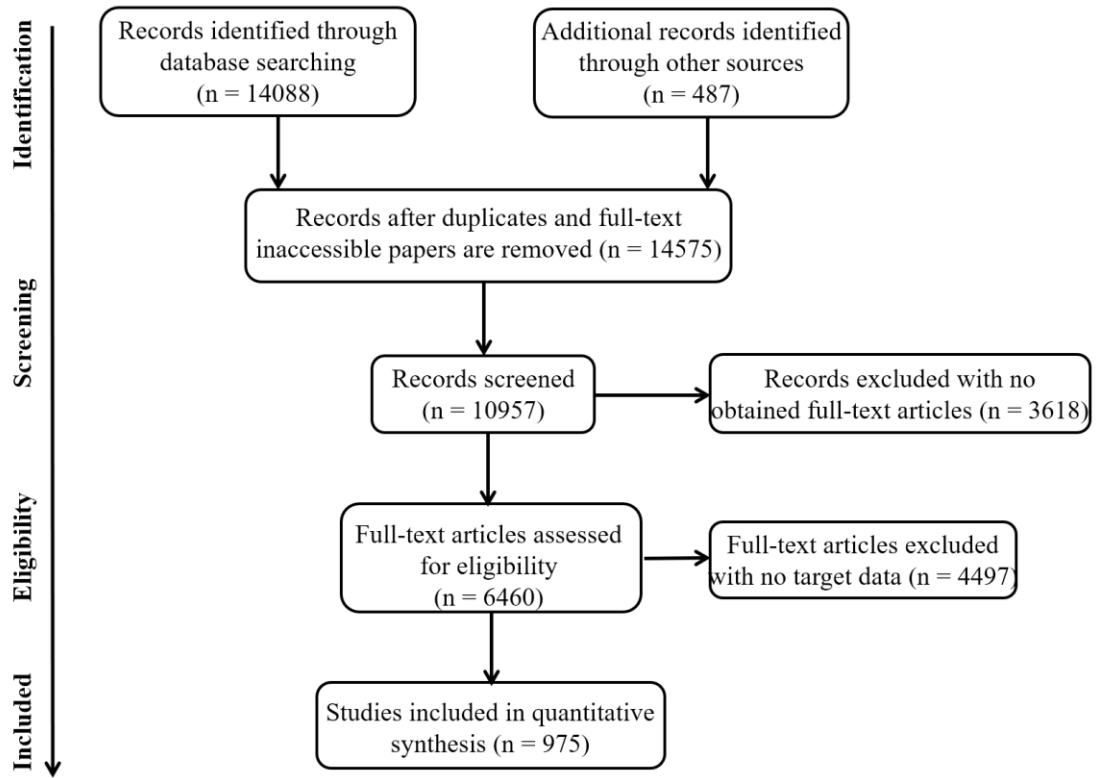

10 **Fig. S2** The autocorrelation between predictors. **(a)** The relationship between soil organic carbon and  
11 soil total nitrogen. **(b)** The relationship between soil clay and silt content.

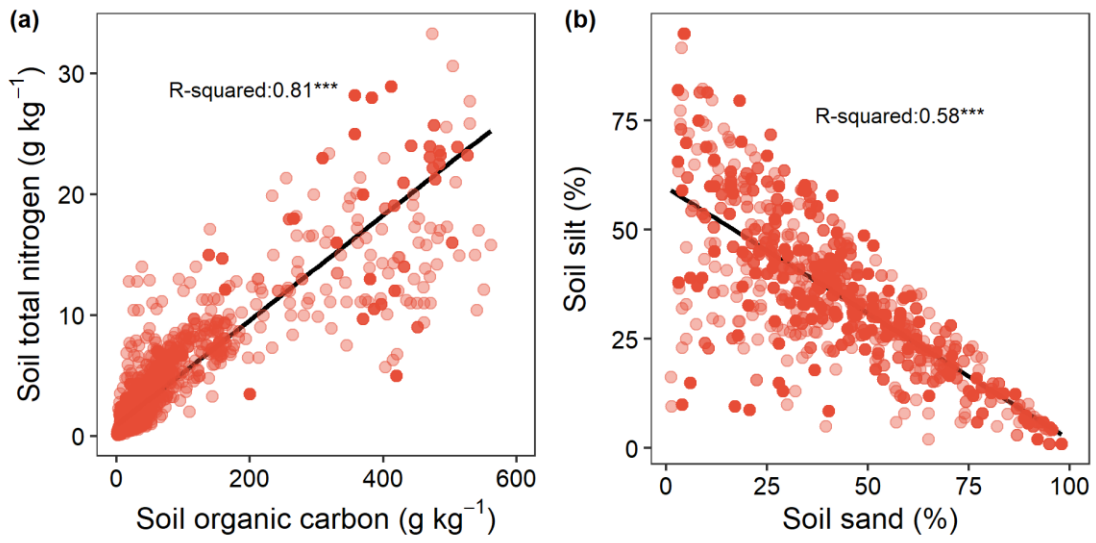

12

13

14 **Fig. S3** The validation of random forest models for soil dissolved organic carbon (DOC). **a** Results of  
15 *K*-fold cross-validation. **b** Model calibration between observation and prediction values.

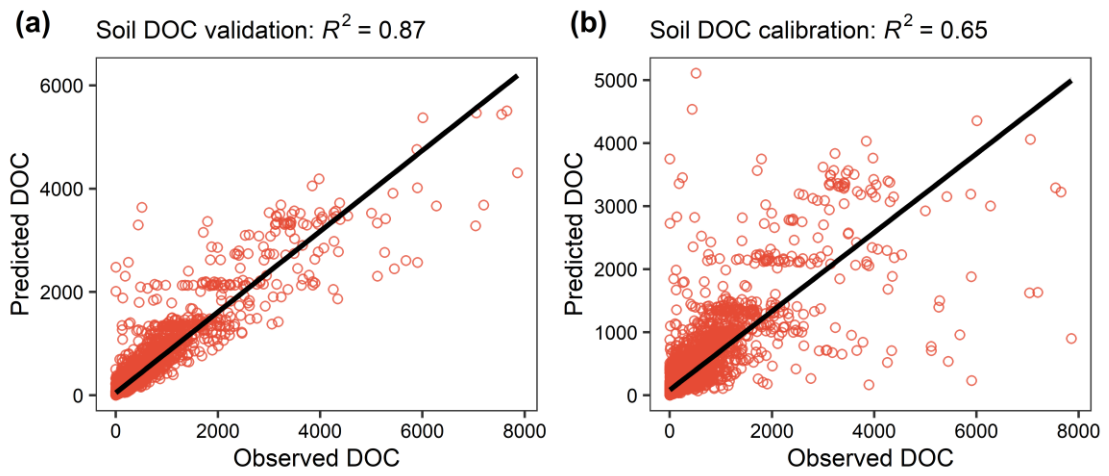

16

17

18 **Fig. S4** The relationship between soil dissolved organic carbon (DOC) concentration and predictors.  
 19 Soil DOC concentration in relation to mean annual temperature (MAT), mean annual precipitation  
 20 (MAP), elevation, soil sand content, soil clay content, soil depth, soil organic carbon (SOC) content,  
 21 soil pH, bulk density, and month (**a, b, c, d, e, f, g, h, i, j, k**, respectively). Binned soil DOC  
 22 concentration measures by 15 groups for predictors, except for month (12 groups). Red dots represent  
 23 the mean values. Solid red lines indicate results of local polynomial regressions based on the binned  
 24 mean values. For visualization, we chose to limit the y-axis to 1600 mg kg<sup>-1</sup>.

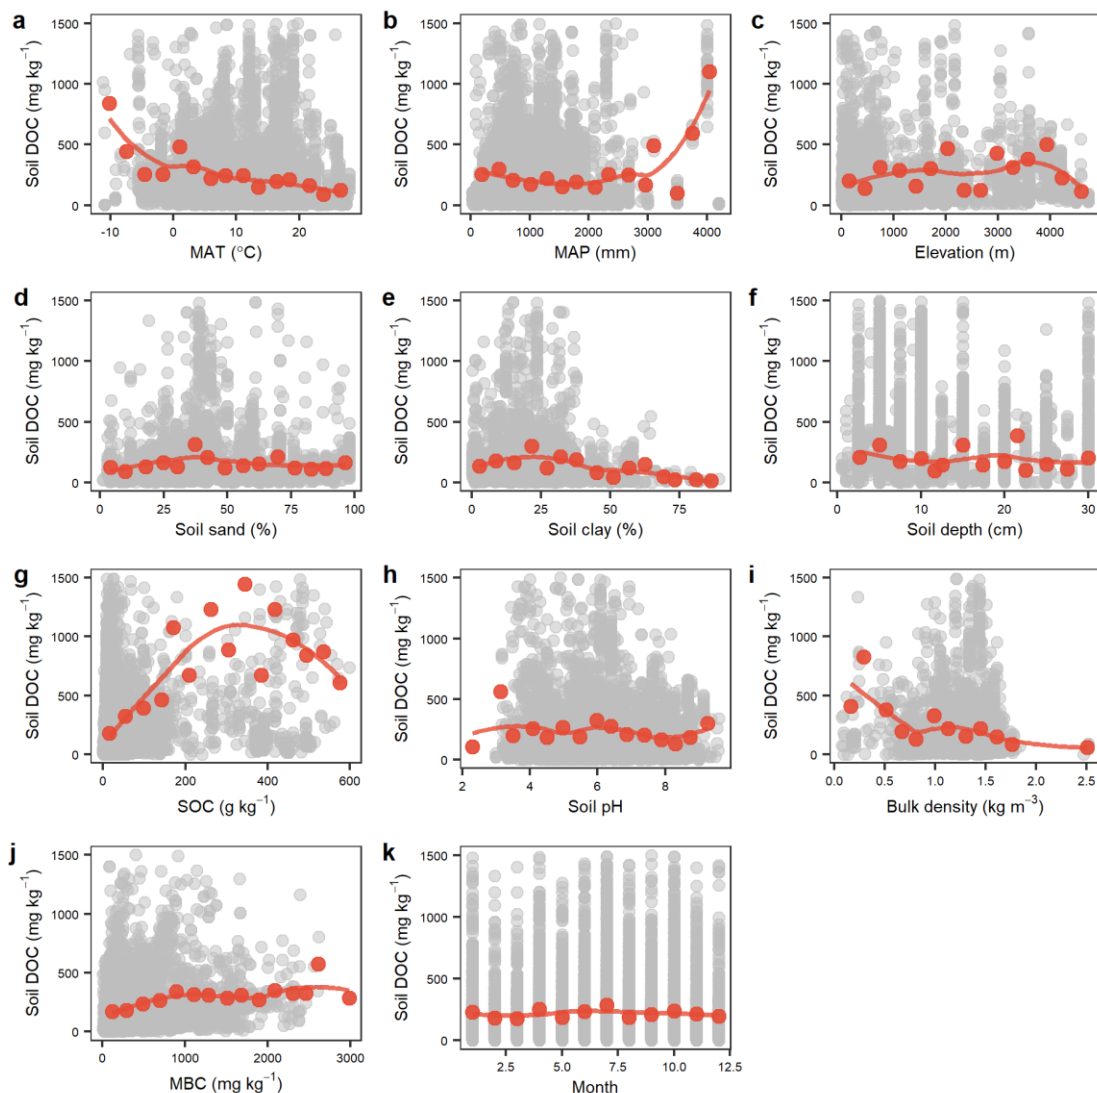

25

26

27 **Fig. S5** Standard deviation (SD) of predicted soil dissolved organic carbon concentration ( $\text{mg kg}^{-1}$ ).

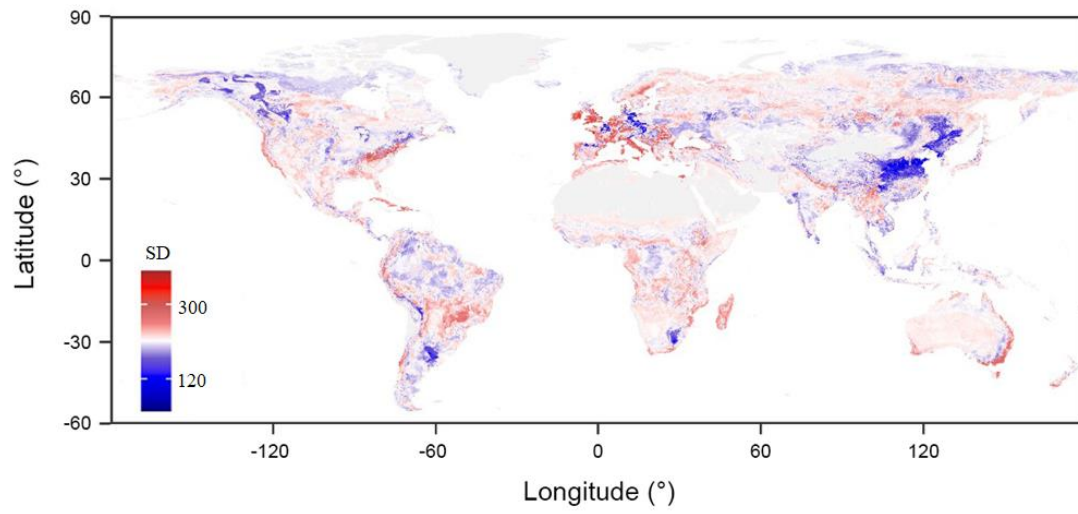

28

29

30 **Table S1.** Summary of independent variables used in this study to predict soil dissolved organic carbon  
 31 concentration.

| Groups  | Variables                 | Original resolution | Data source                                                                                               |
|---------|---------------------------|---------------------|-----------------------------------------------------------------------------------------------------------|
| Climate | Mean annual temperature   | 1 km                | <a href="http://worldclim.org/bioclim">http://worldclim.org/bioclim</a>                                   |
|         | Mean annual precipitation | 1 km                | <a href="http://worldclim.org/bioclim">http://worldclim.org/bioclim</a>                                   |
|         | Elevation                 | 1 km                | <a href="http://worldclim.org/bioclim">http://worldclim.org/bioclim</a>                                   |
| Plants  | Ecosystem                 | 1 km                | <a href="https://sedac.ciesin.columbia.edu">https://sedac.ciesin.columbia.edu</a>                         |
| Soil    | Soil organic carbon       | 250 m               | <a href="https://openlandmap.org">https://openlandmap.org</a>                                             |
|         | Soil pH                   | 250 m               | <a href="https://openlandmap.org">https://openlandmap.org</a>                                             |
|         | Sand                      | 250 m               | <a href="https://openlandmap.org">https://openlandmap.org</a>                                             |
|         | Cay                       | 250 m               | <a href="https://openlandmap.org">https://openlandmap.org</a>                                             |
|         | Bulk density              | 250 m               | <a href="https://openlandmap.org">https://openlandmap.org</a>                                             |
|         | Microbial biomass carbon  | 1 km                | <a href="https://doi.org/10.6084/m9.figshare.19556419">https://doi.org/10.6084/m9.figshare.19556419</a> . |
|         | Soil depth                | 10 km               | <a href="http://globalchange.bnu.edu.cn/research/data">http://globalchange.bnu.edu.cn/research/data</a>   |

32

33

34 **Table S2.** Comparison of model performance for all applied predictive models. Using the assembled  
 35 soil dissolved organic carbon concentration, seven models were applied (linear regression model, lasso  
 36 regression model, elastic net model, bagged cart model, boosted regression trees model, cubist  
 37 regression model, and random forest model). The  $R^2$  and root-mean-square error (RMSE) were  
 38 calculated from 10-fold cross-validation to assess model performance.

| Model   | RMSE | $R^2$ | Regression | Model type         |
|---------|------|-------|------------|--------------------|
| LM      | 410  | 0.108 | Linear     | Non-selective      |
| LEAPS   | 427  | 0.101 | Linear     | Variable selective |
| ENET    | 425  | 0.101 | Linear     | Variable selective |
| BAGGED  | 332  | 0.420 | Non-linear | Machine learning   |
| BOOSTED | 315  | 0.485 | Non-linear | Machine learning   |
| CUBIST  | 254  | 0.666 | Non-linear | Machine learning   |
| RF      | 250  | 0.674 | Non-linear | Machine learning   |

39  
 40  
 41



## 42 **Supplementary Text Data source references**

- 43 1 Wang, F. et al. Grazing greatly reduces the temporal stability of soil cellulolytic fungal  
44 community in a steppe on the Tibetan Plateau. *Journal of Environmental Sciences* 121, 48-57  
45 (2022).
- 46 2 Wang, L. et al. Changes in litter input exert divergent effects on the soil microbial community  
47 and function in stands of different densities. *Science of the Total Environment* 845, 157297  
48 (2022).
- 49 3 Wang, W. et al. Biocrust as a nature-based strategy (NbS) to restore the functionality of  
50 degraded soils in semiarid rainfed alfalfa (*Medicago sativa* L.) field. *Journal of Cleaner*  
51 *Production* 336, 130378 (2022).
- 52 4 Wang, Z. et al. Correlative distribution of DOM and heavy metals in the soils of the Zhangxi  
53 watershed in Ningbo city, East of China. *Environmental Pollution* 299, 118811 (2022).
- 54 5 Yang, J. et al. The effects of plastic film mulching and straw mulching on licorice root yield and  
55 soil organic carbon content in a dryland farming. *Science of The Total Environment* 826, 154113  
56 (2022).
- 57 6 Yu, S. et al. Delayed wet season increases soil net N mineralization in a seasonally dry tropical  
58 forest. *Science of The Total Environment* 823, 153314 (2022).
- 59 7 Wu, D. et al. Molecular linkages between chemodiversity and MCPA complexation behavior of  
60 dissolved organic matter in paddy soil: Effects of land conversion. *Environmental Pollution* 311,  
61 119949 (2022).
- 62 8 Zhang, D. et al. Dissimilar evolution of soil dissolved organic matter chemical properties during  
63 revegetation with arbor and shrub in desertified land of the Mu Us Desert. *Science of The Total*  
64 *Environment* 815, 152904 (2022).
- 65 9 Zhang, H. et al. Land-use-driven change in soil labile carbon affects microbial community  
66 composition and function. *Geoderma* 426, 116056 (2022).
- 67 10 Zhang, Y., Huang, X., Zhang, Z., Blewett, J. & Naafs, B. D. A. Spatiotemporal dynamics of  
68 dissolved organic carbon in a subtropical wetland and their implications for methane emissions.  
69 *Geoderma* 419, 115876 (2022).
- 70 11 Straathof, A. L., Chincarini, R., Comans, R. N. & Hoffland, E. Dynamics of soil dissolved  
71 organic carbon pools reveal both hydrophobic and hydrophilic compounds sustain microbial  
72 respiration. *Soil Biology and Biochemistry* 79, 109-116 (2014).
- 73 12 Ghani, A., Dexter, M., Carran, R. & Theobald, P. Dissolved organic nitrogen and carbon in  
74 pastoral soils: the New Zealand experience. *European Journal of Soil Science* 58, 832-843  
75 (2007).
- 76 13 Curtin, D., Beare, M. H., Chantigny, M. H. & Greenfield, L. G. Controls on the extractability of  
77 soil organic matter in water over the 20 to 80 C temperature range. *Soil Science Society of*  
78 *America Journal* 75, 1423-1430 (2011).
- 79 14 Cook, B. D. & Allan, D. L. Dissolved organic carbon in old field soils: total amounts as a  
80 measure of available resources for soil mineralization. *Soil Biology and Biochemistry* 24,  
81 585-594 (1992).
- 82 15 Neff, J. C. & Hooper, D. U. Vegetation and climate controls on potential CO<sub>2</sub>, DOC and DON  
83 production in northern latitude soils. *Global Change Biology* 8, 872-884 (2002).
- 84 16 Lundquist, E. J., Jackson, L. & Scow, K. Wet-dry cycles affect dissolved organic carbon in two  
85 California agricultural soils. *Soil Biology and Biochemistry* 31, 1031-1038 (1999).

- 86 17 Dou, F., Wright, A. L. & Hons, F. M. Sensitivity of labile soil organic carbon to tillage in wheat-  
87 based cropping systems. *Soil Science Society of America Journal* 72, 1445-1453 (2008).
- 88 18 Liu, Z., Clay, S. A., Clay, D. E. & Harper, S. S. Ammonia fertilizer influences atrazine  
89 adsorption-desorption characteristics. *Journal of Agricultural and Food Chemistry* 43, 815-819  
90 (1995).
- 91 19 Michaelson, G., Ping, C., Kling, G. & Hobbie, J. The character and bioactivity of dissolved  
92 organic matter at thaw and in the spring runoff waters of the arctic tundra north slope, Alaska.  
93 *Journal of Geophysical Research: Atmospheres* 103, 28939-28946 (1998).
- 94 20 Amador, J. A., Görres, J. H. & Savin, M. C. Carbon and nitrogen dynamics in *Lumbricus*  
95 *terrestris* (L.) burrow soil: relationship to plant residues and macropores. *Soil Science Society of*  
96 *America Journal* 67, 1755-1762 (2003).
- 97 21 Chang, C. H. et al. Effects of simulated warming on soil DOC and DON concentrations in the  
98 alpine forest of western Sichuan based on altitudinal gradient experiment. *Ying Yong Sheng tai*  
99 *xue bao= The Journal of Applied Ecology* 27, 663-671 (2016).
- 100 22 Lan, J. et al. Dissolution rate under soil in karst areas and the influencing factors of different  
101 land use patterns. *Acta Ecologica Sinica* 33, 3205-3212 (2013).
- 102 23 Zhong, X.-l. et al. Physical protection by soil aggregates stabilizes soil organic carbon under  
103 simulated N deposition in a subtropical forest of China. *Geoderma* 285, 323-332 (2017).
- 104 24 Liu, D., Song, C., Wang, L., Wang, L. & Li, Y. Exogenous nitrogen enrichment impact on the  
105 carbon mineralization and DOC of the freshwater marsh soil. *Huan Jing ke Xue= Huanjing*  
106 *Kexue* 29, 3525-3530 (2008).
- 107 25 WANG, Q.-k., WANG, S.-l., YU, X.-j., ZHANG, J. & LIU, Y.-x. Soil carbon mineralization  
108 potential and its effect on soil active organic carbon in evergreen broadleaved forest and Chinese  
109 fir plantation. *Chinese Journal of Ecology* 26, 1918 (2007).
- 110 26 Qi, Y.-C. et al. Responses of soil total organic carbon and dissolved organic carbon to simulated  
111 nitrogen deposition in temperate typical steppe in Inner Mongolia, China. *Huan Jing ke Xue=*  
112 *Huanjing Kexue* 35, 3073-3082 (2014).
- 113 27 Wu, H. et al. Accumulation of nitrate and dissolved organic nitrogen at depth in a red soil  
114 Critical Zone. *Geoderma* 337, 1175-1185 (2019).
- 115 28 Xi, M. et al. Assessment of the content, structure, and source of soil dissolved organic matter in  
116 the coastal wetlands of Jiaozhou Bay, China. *Physics and Chemistry of the Earth, Parts A/b/c*  
117 103, 35-44 (2018).
- 118 29 Xiao-yan, Y. et al. Effects of extraction conditions on topsoil dissolved organic carbon  
119 concentration of black soil. *Journal of Beijing Forestry University* 35, 68-72 (2013).
- 120 30 Zhou, Z. et al. Changes in soil physicochemical properties and bacterial communities among  
121 different soil depths after long-term straw mulching under a no-till system. *SOIL Discussions*  
122 2021, 1-33 (2021).
- 123 31 Zhang, J. et al. Different responses of soil respiration and its components to nitrogen and  
124 phosphorus addition in a subtropical secondary forest. *Forest Ecosystems* 8, 1-13 (2021).
- 125 32 Sun, X. et al. Organic mulching promotes soil organic carbon accumulation to deep soil layer in  
126 an urban plantation forest. *Forest Ecosystems* 8, 1-11 (2021).
- 127 33 Li, W.-y., Guo, Z., Li, J. & Han, J.-c. Effects of different proportions of soft rock additions on  
128 organic carbon pool and bacterial community structure of sandy soil. *Scientific Reports* 11, 4624  
129 (2021).

- 130 34 Ghosh, M. et al. Short-term carbon sequestration and changes of soil organic carbon pools in  
131 rice under integrated nutrient management in India. *Agriculture* 11, 348 (2021).
- 132 35 Che, Q., Li, M. & Zhang, Z. Effects of biochar application on soil organic carbon in degraded  
133 saline-sodic wetlands of Songnen Plain, Northeast China. *Chinese Geographical Science* 31,  
134 877-887 (2021).
- 135 36 Anning, D. K. et al. Divergent Accumulation of Microbial Residues and Amino Sugars in Loess  
136 Soil after Six Years of Different Inorganic Nitrogen Enrichment Scenarios. *Applied Sciences* 11,  
137 5788 (2021).
- 138 37 Zhang, L. et al. Soil labile organic carbon fractions and soil enzyme activities after 10 years of  
139 continuous fertilization and wheat residue incorporation. *Scientific Reports* 10, 11318 (2020).
- 140 38 Walkiewicz, A., Brzezińska, M., Bieganski, A., Sas-Paszt, L. & Frąc, M. Early response of  
141 soil microbial biomass and activity to biofertilizer application in degraded brunic arenosol and  
142 abruptic luvisol of contrasting textures. *Agronomy* 10, 1347 (2020).
- 143 39 Li, P. et al. Effects of straw and its biochar applications on the abundance and community  
144 structure of CO<sub>2</sub>-fixing bacteria in a sandy agricultural soil. *Journal of soils and sediments* 20,  
145 2225-2235 (2020).
- 146 40 Han, Y. et al. Effects of straw-return method for the maize–rice rotation system on soil  
147 properties and crop yields. *Agronomy* 10, 461 (2020).
- 148 41 Fan, W. & Wu, J. Short-term effects of returning granulated straw on soil microbial community  
149 and organic carbon fractions in dryland farming. *Journal of Microbiology* 58, 657-667 (2020).
- 150 42 Fan, D. et al. Nitrogen deep placement mitigates methane emissions by regulating methanogens  
151 and methanotrophs in no-tillage paddy fields. *Biology and fertility of soils* 56, 711-727 (2020).
- 152 43 Abd El-Azeim, M., Sherif, M., Hussien, M. & Haddad, S. Temporal impacts of different  
153 fertilization systems on soil health under arid conditions of potato monocropping. *Journal of*  
154 *Soil Science and Plant Nutrition* 20, 322-334 (2020).
- 155 44 Zhou, Z. et al. Long-term straw mulch effects on crop yields and soil organic carbon fractions at  
156 different depths under a no-till system on the Chengdu Plain, China. *Journal of soils and*  
157 *sediments* 19, 2143-2152 (2019).
- 158 45 Yang, S., Sun, X., Ding, J., Jiang, Z. & Xu, J. Effects of biochar addition on the NEE and soil  
159 organic carbon content of paddy fields under water-saving irrigation. *Environmental Science*  
160 *and Pollution Research* 26, 8303-8311 (2019).
- 161 46 Karimi, A., Moezzi, A., Chorom, M. & Enayatizamir, N. Chemical fractions and availability of  
162 Zn in a calcareous soil in response to biochar amendments. *Journal of Soil Science and Plant*  
163 *Nutrition* 19, 851-864 (2019).
- 164 47 Irfan, M. et al. Response of soil microbial biomass and enzymatic activity to biochar  
165 amendment in the organic carbon deficient arid soil: a 2-year field study. *Arabian Journal of*  
166 *Geosciences* 12, 1-9 (2019).
- 167 48 Azeem, M. et al. Effects of biochar and NPK on soil microbial biomass and enzyme activity  
168 during 2 years of application in the arid region. *Arabian Journal of Geosciences* 12, 1-13 (2019).
- 169 49 Yang, X. et al. Labile organic carbon fractions and carbon pool management index in a 3-year  
170 field study with biochar amendment. *Journal of soils and sediments* 18, 1569-1578 (2018).
- 171 50 Li, J. et al. Response of soil organic carbon fractions, microbial community composition and  
172 carbon mineralization to high-input fertilizer practices under an intensive agricultural system.  
173 *PLoS One* 13, e0195144 (2018).

- 174 51 Chen, Z., Wang, Q., Wang, H., Bao, L. & Zhou, J. Crop yields and soil organic carbon fractions  
175 as influenced by straw incorporation in a rice–wheat cropping system in southeastern China.  
176 *Nutrient Cycling in Agroecosystems* 112, 61-73 (2018).
- 177 52 Páraga-Aguado, I., Alcoba-Gómez, P. & Conesa, H. M. Suitability of a municipal solid waste as  
178 organic amendment for agricultural and metal (loid)-contaminated soils: effects on soil  
179 properties, plant growth and metal (loid) allocation in *Zea mays* L. *Journal of Soils and*  
180 *Sediments* 17, 2469-2480 (2017).
- 181 53 Liu, M. et al. Improved nutrient status affects soil microbial biomass, respiration, and functional  
182 diversity in a Lei bamboo plantation under intensive management. *Journal of Soils and*  
183 *Sediments* 17, 917-926 (2017).
- 184 54 Liu, H. et al. Responses of soil methanogens, methanotrophs, and methane fluxes to land-use  
185 conversion and fertilization in a hilly red soil region of southern China. *Environmental Science*  
186 *and Pollution Research* 24, 8731-8743 (2017).
- 187 55 Gebhardt, M., Fehmi, J. S., Rasmussen, C. & Gallery, R. E. Soil amendments alter plant  
188 biomass and soil microbial activity in a semi-desert grassland. *Plant and soil* 419, 53-70 (2017).
- 189 56 Zou, H. et al. Effects of straw return in deep soils with urea addition on the soil organic carbon  
190 fractions in a semi-arid temperate cornfield. *PloS one* 11, e0153214 (2016).
- 191 57 Zhang, L. et al. Changes in soil carbon and enzyme activity as a result of different long-term  
192 fertilization regimes in a greenhouse field. *PloS one* 10, e0118371 (2015).
- 193 58 Wang, Y. et al. 23-year manure and fertilizer application increases soil organic carbon  
194 sequestration of a rice–barley cropping system. *Biology and Fertility of Soils* 51, 583-591  
195 (2015).
- 196 59 An, T. et al. Dynamics and distribution of <sup>13</sup>C-labeled straw carbon by microorganisms as  
197 affected by soil fertility levels in the Black Soil region of Northeast China. *Biology and Fertility*  
198 *of Soils* 51, 605-613 (2015).
- 199 60 Zhu, L., Hu, N., Yang, M., Zhan, X. & Zhang, Z. Effects of different tillage and straw return on  
200 soil organic carbon in a rice-wheat rotation system. *PLOS one* 9, e88900 (2014).
- 201 61 Tian, J., Lu, S., Fan, M., Li, X. & Kuzyakov, Y. Integrated management systems and N  
202 fertilization: effect on soil organic matter in rice-rapeseed rotation. *Plant and soil* 372, 53-63  
203 (2013).
- 204 62 Liu, B. et al. 14 year applications of chemical fertilizers and crop straw effects on soil labile  
205 organic carbon fractions, enzyme activities and microbial community in rice-wheat rotation of  
206 middle China. *Science of the Total Environment* 841, 156608 (2022).
- 207 63 Liu, E., Yan, C., Mei, X., Zhang, Y. & Fan, T. Long-term effect of manure and fertilizer on soil  
208 organic carbon pools in dryland farming in northwest China. *Plos one* 8, e56536 (2013).
- 209 64 Lin, S. et al. Nitrous oxide emissions from yellow brown soil as affected by incorporation of  
210 crop residues with different carbon-to-nitrogen ratios: a case study in central China. *Archives of*  
211 *environmental contamination and toxicology* 65, 183-192 (2013).
- 212 65 Liang, Q. et al. Effects of 15 years of manure and inorganic fertilizers on soil organic carbon  
213 fractions in a wheat-maize system in the North China Plain. *Nutrient Cycling in Agroecosystems*  
214 92, 21-33 (2012).
- 215 66 Zhu, H., Gong, L., Ding, Z. & Li, Y. Effects of litter and root manipulations on soil carbon and  
216 nitrogen in a Schrenk's spruce (*Picea schrenkiana*) forest. *PLoS One* 16, e0247725 (2021).
- 217 67 Xiao, Q. et al. Long-term manuring increases microbial carbon use efficiency and mitigates

218 priming effect via alleviated soil acidification and resource limitation. *Biology and Fertility of*  
219 *Soils* 57, 925-934 (2021).

220 68 Wang, D. et al. Nitrogen fertilization overweighs intercropping in promotion of dissolved  
221 organic carbon concentration and complexity in potato-cropped soil. *Plant and Soil* 462,  
222 273-284 (2021).

223 69 Chen, Q. et al. Quantitative and Qualitative Responses of Soil Water-Extractable Organic Matter  
224 to Carbon and Nitrogen Management Practices in Loess Soil. *Agronomy* 11, 2025 (2021).

225 70 Bizimana, F. et al. Effects of long-term nitrogen fertilization on N<sub>2</sub>O, N<sub>2</sub> and their  
226 yield-scaled emissions in a temperate semi-arid agro-ecosystem. *Journal of Soils and Sediments*  
227 21, 1659-1671 (2021).

228 71 Tang, H. et al. Short-term responses of soil organic carbon and its labile fractions to different  
229 manure Nitrogen input in a double-cropping rice field. *The Journal of Agricultural Science* 158,  
230 119-127 (2020).

231 72 Song, D. et al. Effects of straw mulching practices on soil nematode communities under walnut  
232 plantation. *Scientific Reports* 10, 15351 (2020).

233 73 Liu, X., Feng, Z., Zhou, Y., Zhu, H. & Yao, Q. Plant Species-Dependent Effects of Liming and  
234 Plant Residue Incorporation on Soil Bacterial Community and Activity in an Acidic Orchard  
235 Soil. *Applied Sciences* 10, 5681 (2020).

236 74 Liu, J. et al. Variation of soil dissolved organic carbon under long-term different fertilizations  
237 and its correlation with maize yields. *Journal of Soils and Sediments* 20, 2761-2770 (2020).

238 75 Li, Z. et al. Green manure incorporation with reductions in chemical fertilizer inputs improves  
239 rice yield and soil organic matter accumulation. *Journal of Soils and Sediments* 20, 2784-2793  
240 (2020).

241 76 Bah, H., Ren, X., Wang, Y., Tang, J. & Zhu, B. Characterizing greenhouse gas emissions and  
242 global warming potential of wheat-maize cropping systems in response to organic amendments  
243 in eutric regosols, China. *Atmosphere* 11, 614 (2020).

244 77 Mohamed, W. S. & Hammam, A. A. Poultry manure-derived biochar as a soil amendment and  
245 fertilizer for sandy soils under arid conditions. *Egyptian Journal of Soil Science* 59, 1-14 (2019).

246 78 Liu, Y. et al. Effects of water and organic manure coupling on the immobilization of cadmium  
247 by sepiolite. *Journal of soils and sediments* 19, 798-808 (2019).

248 79 Kim, S. U. et al. Nitrous oxide emission from upland soil amended with different animal  
249 manures. *Applied biological chemistry* 62, 1-8 (2019).

250 80 Chen, T. et al. Seasonal variations in N<sub>2</sub> and N<sub>2</sub>O emissions from a wheat–maize cropping  
251 system. *Biology and fertility of soils* 55, 539-551 (2019).

252 81 Peng, C., Hong-Yan, W., Zheng, R.-L., Zhang, B. & Guo-Xin, S. Long-term effects of biochar  
253 on rice production and stabilisation of cadmium and arsenic levels in contaminated paddy soils.  
254 *Earth and Environmental Science Transactions of The Royal Society of Edinburgh* 109, 415-420  
255 (2018).

256 82 Xu, P. et al. Structure and biodegradability of dissolved organic matter from Ultisol treated with  
257 long-term fertilizations. *Journal of soils and sediments* 18, 1865-1872 (2018).

258 83 Xiao, Y. et al. Effect of biochar amendment on methane emissions from paddy field under  
259 water-saving irrigation. *Sustainability* 10, 1371 (2018).

260 84 Liu, Z., Nan, Z., Zhao, C. & Yang, Y. Potato absorption and phytoavailability of Cd, Ni, Cu, Zn  
261 and Pb in sierozem soils amended with municipal sludge compost. *Journal of Arid Land* 10,

262 638-652 (2018).

263 85 Conti, L. D. et al. Aluminum species and activity in sandy soil solution with pig slurry addition.  
264 Pesquisa Agropecuária Brasileira 52, 914-922 (2017).

265 86 Chen, A. et al. Rapid decrease of soil carbon after abandonment of subtropical paddy fields.  
266 Plant and Soil 415, 203-214 (2017).

267 87 Antonangelo, J. A., Ferrari, J., Crusciol, C. A. C. & Alleoni, L. R. F. Lime and  
268 calcium-magnesium silicate in the ionic speciation of an Oxisol. Scientia Agricola 74, 317-333  
269 (2017).

270 88 Zhao, B., Zhang, J., Yu, Y., Karlen, D. L. & Hao, X. Crop residue management and fertilization  
271 effects on soil organic matter and associated biological properties. Environmental Science and  
272 Pollution Research 23, 17581-17591 (2016).

273 89 Wang, X.-g., Li, C.-s., Luo, Y., Hua, K.-k. & Zhou, M.-h. The impact of nitrogen amendment  
274 and crop growth on dissolved organic carbon in soil solution. Journal of Mountain Science 13,  
275 95-103 (2016).

276 90 Wang, X., Tang, C., Baldock, J., Butterly, C. & Gazey, C. Long-term effect of lime application  
277 on the chemical composition of soil organic carbon in acid soils varying in texture and liming  
278 history. Biology and Fertility of Soils 52, 295-306 (2016).

279 91 Strid, A., Lee, B. S. & Lajtha, K. Homogenization of detrital leachate in an old-growth  
280 coniferous forest, OR: DOC fluorescence signatures in soils undergoing long-term litter  
281 manipulations. Plant and Soil 408, 133-148 (2016).

282 92 Sánchez-García, M. et al. Compost vs biochar amendment: a two-year field study evaluating soil  
283 C build-up and N dynamics in an organically managed olive crop. Plant and Soil 408, 1-14  
284 (2016).

285 93 Liu, H. et al. Effects of land use conversion and fertilization on CH<sub>4</sub> and N<sub>2</sub>O fluxes from  
286 typical hilly red soil. Environmental Science and Pollution Research 23, 20269-20280 (2016).

287 94 Liu, C. et al. Biochar increased water holding capacity but accelerated organic carbon leaching  
288 from a sloping farmland soil in China. Environmental Science and Pollution Research 23,  
289 995-1006 (2016).

290 95 Gu, C. et al. Dynamic changes of soil surface organic carbon under different mulching practices  
291 in citrus orchards on sloping land. PLoS one 11, e0168384 (2016).

292 96 Shang, F., Ren, S., Yang, P., Li, C. & Ma, N. Effects of different fertilizer and irrigation water  
293 types, and dissolved organic matter on soil C and N mineralization in crop rotation farmland.  
294 Water, Air, & Soil Pollution 226, 1-25 (2015).

295 97 Xie, B. et al. N<sub>2</sub>O emissions from an apple orchard in the coastal area of Bohai Bay, China. The  
296 Scientific World Journal 2014, 164732 (2014).

297 98 Kim, S. Y., Pramanik, P., Bodelier, P. L. & Kim, P. J. Cattle manure enhances methanogens  
298 diversity and methane emissions compared to swine manure under rice paddy. PLoS One 9,  
299 e113593 (2014).

300 99 Blair, R. M., Savin, M. C. & Chen, P. Composted and formulated poultry litters promote soil  
301 nutrient availability but not plant uptake or edamame quality. Agronomy for sustainable  
302 development 34, 849-856 (2014).

303 100 Bajgai, Y., Kristiansen, P., Hulugalle, N. & McHenry, M. Changes in soil carbon fractions due to  
304 incorporating corn residues in organic and conventional vegetable farming systems. Soil  
305 research 52, 244-252 (2014).

- 306 101 Lee, C. H. et al. Different response of silicate fertilizer having electron acceptors on methane  
307 emission in rice paddy soil under green manuring. *Biology and Fertility of Soils* 48, 435-442  
308 (2012).
- 309 102 Zambrosi, F. C. B., Alleoni, L. R. F. & Caires, E. F. Liming and ionic speciation of an Oxisol  
310 under no-till system. *Scientia Agricola* 65, 190-203 (2008).
- 311 103 Kalbitz, K., Meyer, A., Yang, R. & Gerstberger, P. Response of dissolved organic matter in the  
312 forest floor to long-term manipulation of litter and throughfall inputs. *Biogeochemistry* 86,  
313 301-318 (2007).
- 314 104 Shand, C. & Coutts, G. The effects of sheep faeces on soil solution composition. *Plant and Soil*  
315 285, 135-148 (2006).
- 316 105 Yano, Y., Lajtha, K., Sollins, P. & Caldwell, B. A. Chemistry and dynamics of dissolved organic  
317 matter in a temperate coniferous forest on andic soils: effects of litter quality. *Ecosystems* 8,  
318 286-300 (2005).
- 319 106 Lajtha, K. et al. Detrital controls on soil solution N and dissolved organic matter in soils: a field  
320 experiment. *Biogeochemistry* 76, 261-281 (2005).
- 321 107 Park, J.-H. & Matzner, E. Controls on the release of dissolved organic carbon and nitrogen from  
322 a deciduous forest floor investigated by manipulations of aboveground litter inputs and water  
323 flux. *Biogeochemistry* 66, 265-286 (2003).
- 324 108 Yavitt, J. B. & Fahey, T. J. Peat and solution chemistry responses to CaCO<sub>3</sub> application in  
325 wetlands next to Woods Lake, New York. *Experimental Watershed Liming Study*, 103-121  
326 (1996).
- 327 109 Geary, R. J. & Driscoll, C. T. Forest soil solutions: acid/base chemistry and response to calcite  
328 treatment. *Experimental Watershed Liming Study*, 53-78 (1996).
- 329 110 Smolander, A., Kitunen, V., Priha, O. & Mäkkönen, E. Nitrogen transformations in limed and  
330 nitrogen fertilized soil in Norway spruce stands. *Plant and Soil* 172, 107-115 (1995).
- 331 111 Kreuzer, K. in *Nutrient Uptake and Cycling in Forest Ecosystems: Proceedings of the*  
332 *CEC/IUFRO Symposium Nutrient Uptake and Cycling in Forest Ecosystems Halmstad, Sweden,*  
333 *June, 7–10, 1993.* 447-470 (Springer).
- 334 112 ULLAH, B. Soil Nitrous Oxide Emission as Affected by Application of Phosphorus, 华中农业  
335 大学, (2016).
- 336 113 Hung, C.-Y., Ejack, L. & Whalen, J. K. Fall-applied manure with cover crop did not increase  
337 nitrous oxide emissions during spring freeze-thaw periods. *Applied Soil Ecology* 158, 103786  
338 (2021).
- 339 114 Munera-Echeverri, J. L., Martinsen, V., Strand, L. T., Cornelissen, G. & Mulder, J. Effect of  
340 conservation farming and biochar addition on soil organic carbon quality, nitrogen  
341 mineralization, and crop productivity in a light textured Acrisol in the sub-humid tropics. *PLoS*  
342 *one* 15, e0228717 (2020).
- 343 115 Akley, K. E. Impacts of cropping systems on soil health and microbial ecology, Kansas State  
344 University, (2015).
- 345 116 Omari, R. A. et al. Influence of organic inputs with mineral fertilizer on maize yield and soil  
346 microbial biomass dynamics in different seasons in a tropical Acrisol. *Environmental*  
347 *Sustainability* 3, 45-57 (2020).
- 348 117 Ansong Omari, R. et al. Nitrogen mineralization and microbial biomass dynamics in different  
349 tropical soils amended with contrasting organic resources. *Soil Systems* 2, 63 (2018).

- 350 118 Zhang, Y. et al. Long-Term Fertilization Alters the Chemical Composition of Dissolved Organic  
351 Carbon via Regulating Soil Physicochemical Factors. (2021).
- 352 119 Ohno, T., Griffin, T. S., Liebman, M. & Porter, G. A. Chemical characterization of soil  
353 phosphorus and organic matter in different cropping systems in Maine, USA. *Agriculture,*  
354 *ecosystems & environment* 105, 625-634 (2005).
- 355 120 Gao, J., Liu, L., Shi, Z. & Lv, J. Characteristics of Fluorescent Dissolved Organic Matter in  
356 Paddy Soil Amended With Crop Residues After Column (0–40 cm) Leaching. *Frontiers in*  
357 *Environmental Science* 10, 766795 (2022).
- 358 121 Zheng, H. et al. Field-aged biochar enhances soil organic carbon by increasing recalcitrant  
359 organic carbon fractions and making microbial communities more conducive to carbon  
360 sequestration. *Agriculture, Ecosystems & Environment* 340, 108177 (2022).
- 361 122 Sun, X., Liu, J., Liu, S. & Gao, W. Soil organic carbon fractions comparison after 40-year  
362 long-term fertilisation in a wheat-corn rotation field. *Soil & Water Research* 17 (2022).
- 363 123 Xu, Y. et al. Dissolved N and C leaching losses mitigated by optimized fertilization management  
364 in intensive greenhouse system: insights from DOM characteristics via EEM-PARAFAC.  
365 *Journal of Soils and Sediments* 23, 657-671 (2023).
- 366 124 Ma, F. et al. Impacts of elevated atmospheric CO<sub>2</sub> and N fertilization on N<sub>2</sub>O emissions and  
367 dynamics of associated soil labile C components and mineral N in a maize field in the North  
368 China plain. *Agronomy* 12, 432 (2022).
- 369 125 Zhang, Z. et al. Cover crops and N fertilization affect soil ammonia volatilization and N<sub>2</sub>O  
370 emission by regulating the soil labile carbon and nitrogen fractions. *Agriculture, Ecosystems &*  
371 *Environment* 340, 108188 (2022).
- 372 126 Wang, X., Jian, S., Gamage, L. & Li, J. Effect of nitrogen fertilization on central tendency and  
373 spatial heterogeneity of soil moisture, pH and dissolved organic carbon and nitrogen in two  
374 bioenergy croplands#. *Journal of Plant Nutrition and Soil Science* 185, 355-369 (2022).
- 375 127 Wang, D. et al. Compost amendment maintains soil structure and carbon storage by increasing  
376 available carbon and microbial biomass in agricultural soil—A six-year field study. *Geoderma*  
377 427, 116117 (2022).
- 378 128 Chen, K. et al. Biochar-induced changes in the soil diazotroph community abundance and  
379 structure in a peanut field trial. *Biochar* 4, 26 (2022).
- 380 129 Wang, C., Du, S. & Nishimura, O. Rice rusk-derived biochar suppressed N<sub>2</sub>O emission from  
381 acidic arable soil by inhibiting nitrate reduction. *Journal of Soil Science and Plant Nutrition* 22,  
382 3189-3199 (2022).
- 383 130 Xu, P. et al. Prior nitrogen fertilization stimulated N<sub>2</sub>O emission from rice cultivation season  
384 under a rapeseed-rice production system. *Plant and Soil*, 1-12 (2022).
- 385 131 Yang, Y., Liu, H. & Lv, J. Response of N<sub>2</sub>O emission and denitrification genes to different  
386 inorganic and organic amendments. *Scientific Reports* 12, 3940 (2022).
- 387 132 Fan, D., Cao, C. & Li, C. Integrated organic-inorganic nitrogen fertilization mitigates nitrous  
388 oxide emissions by regulating ammonia-oxidizing bacteria in purple caitai fields. *Agriculture* 12,  
389 723 (2022).
- 390 133 Maslov, M., Astaykina, A. & Pozdnyakov, L. Earthworm *Lumbricus terrestris* contributes  
391 nitrous oxide emission from temperate agricultural soil regardless of applied mineral nitrogen  
392 fertilizer doses. *Agronomy* 12, 2745 (2022).
- 393 134 Xu, Y. et al. Long-term successive biochar amendments Alter the composition and  $\alpha$ -diversity of



394 bacterial Community of Paddy Soil in Rice-wheat rotation. *Frontiers in Environmental Science*  
395 10, 921766 (2022).

396 135 Huang, R. et al. Biochar Application Increases Labile Carbon and Inorganic Nitrogen Supply in  
397 a Continuous Monocropping Soil. *Land* 11, 473 (2022).

398 136 Lin, H. et al. How do soil organic carbon pool, stock and their stability respond to crop residue  
399 incorporation in subtropical calcareous agricultural soils? *Agriculture, Ecosystems &*  
400 *Environment* 332, 107927 (2022).

401 137 Gu, Y.-J., Han, C.-L., Kong, M., Siddique, K. H. & Li, F.-M. Film Mulching with Low  
402 Phosphorus Application Improves Soil Organic Carbon and Its Decomposability in a Semiarid  
403 Agroecosystem. *Agriculture* 12, 816 (2022).

404 138 Al-Graiti, T. et al. The composition of dissolved organic matter in arable lands: does soil  
405 management practice matter? *Agronomy* 12, 2797 (2022).

406 139 Xu, P. et al. Methane emission from rice cultivation regulated by soil hydrothermal condition  
407 and available carbon and nitrogen under a rice–wheat rotation system. *Plant and Soil* 480,  
408 283-294 (2022).

409 140 Bal k, J. et al. The impact of the long-term application of mineral nitrogen and sewage sludge  
410 fertilizers on the quality of soil organic matter. *Chemical and Biological Technologies in*  
411 *Agriculture* 9, 86 (2022).

412 141 Cao, B. et al. Long-term nitrogen and straw application improves wheat production and soil  
413 organic carbon sequestration. *Journal of Soil Science and Plant Nutrition* 22, 3364-3376 (2022).

414 142 Bai, J. et al. Effects of sewage sludge application on plant growth and soil characteristics at a  
415 *Pinus sylvestris* var. *mongolica* plantation in Horqin sandy land. *Forests* 13, 984 (2022).

416 143 Ji, C. et al. Reductive soil disinfestation with biochar amendment modified microbial  
417 community composition in soils under plastic greenhouse vegetable production. *Soil and Tillage*  
418 *Research* 218, 105323 (2022).

419 144 Abagandura, G. O. et al. Soil labile carbon and nitrogen fractions after eleven years of manure  
420 and mineral fertilizer applications. *Archives of Agronomy and Soil Science* 69, 875-890 (2023).

421 145 Chen, K. et al. Effects of applying maize stover on soil diazotroph community diminish with  
422 depth. *Applied Soil Ecology* 179, 104573 (2022).

423 146 Chen, M. et al. Effects of organic fertilization on phosphorus availability and crop growth:  
424 Evidence from a 7-year fertilization experiment. *Archives of Agronomy and Soil Science* 69,  
425 2092-2103 (2023).

426 147 Du, L. et al. Fertilization regime shifts the molecular diversity and chlorine reactivity of soil  
427 dissolved organic matter from tropical croplands. *Water Research* 225, 119106 (2022).

428 148 Jiang, N. et al. Effects of straw and biochar amendment on hydrological fluxes of dissolved  
429 organic carbon in a subtropical montane agricultural landscape. *Environmental Pollution* 296,  
430 118751 (2022).

431 149 Jiang, S. et al. Field-scale fluorescence fingerprints of biochar-derived dissolved organic matter  
432 (DOM) provide an effective way to trace biochar migration and the downward co-migration of  
433 Pb, Cu and As in soil. *Chemosphere* 301, 134738 (2022).

434 150 Li, K. et al. Unveiling the role of dissolved organic matter on phosphorus sorption and  
435 availability in a 5-year manure amended paddy soil. *Science of the Total Environment* 838,  
436 155892 (2022).

437 151 Li, Y. et al. Biochar incorporation increases winter wheat (*Triticum aestivum* L.) production

438 with significantly improving soil enzyme activities at jointing stage. *Catena* 211, 105979 (2022).

439 152 Lin, S. et al. Combined slag and biochar amendments to subtropical paddy soils lead to a  
440 short-term change of bacteria community structure and rise of soil organic carbon. *Applied Soil*  
441 *Ecology* 179, 104593 (2022).

442 153 Liu, X. et al. Effects of nitrogen-enriched biochar on subtropical paddy soil organic carbon pool  
443 dynamics. *Science of The Total Environment* 851, 158322 (2022).

444 154 Rombolà A. G. et al. Effect of biochar amendment on organic matter and dissolved organic  
445 matter composition of agricultural soils from a two-year field experiment. *Science of The Total*  
446 *Environment* 812, 151422 (2022).

447 155 Wang, H. et al. Variation in Soil Denitrification among Fertilization Regimes and Its Microbial  
448 Mechanism. *Geomicrobiology Journal* 39, 722-730 (2022).

449 156 Issah, G., Schoenau, J. & Knight, J. Landscape position, sampling time, and tillage, but not  
450 legume species, affect labile carbon and nitrogen fractions in a 4-yr-old rejuvenated grazed  
451 pasture. *Canadian Journal of Soil Science* 101, 641-653 (2021).

452 157 Kobierski, M., Lemanowicz, J., Wojewódzki, P. & Kondratowicz-Maciejewska, K. The effect of  
453 organic and conventional farming systems with different tillage on soil properties and enzymatic  
454 activity. *Agronomy* 10, 1809 (2020).

455 158 Chen, J., Zhu, R., Zhang, Q., Kong, X. & Sun, D. Reduced-tillage management enhances soil  
456 properties and crop yields in a alfalfa-corn rotation: Case study of the Songnen Plain, China.  
457 *Scientific Reports* 9, 17064 (2019).

458 159 Ghimire, R., Norton, J. B., Stahl, P. D. & Norton, U. Soil microbial substrate properties and  
459 microbial community responses under irrigated organic and reduced-tillage crop and forage  
460 production systems. *PloS one* 9, e103901 (2014).

461 160 Dong, W., Hu, C., Chen, S. & Zhang, Y. Tillage and residue management effects on soil carbon  
462 and CO<sub>2</sub> emission in a wheat-corn double-cropping system. *Nutrient Cycling in*  
463 *Agroecosystems* 83, 27-37 (2009).

464 161 Virk, A. L. et al. Effects of diversified cropping sequences and tillage practices on soil organic  
465 carbon, nitrogen, and associated fractions in the North China Plain. *Journal of Soil Science and*  
466 *Plant Nutrition* 21, 1201-1212 (2021).

467 162 Qiu, Q. et al. Variability and controls of soil CO<sub>2</sub> fluxes under different tillage and crop residue  
468 managements in a wheat-maize double-cropping system. *Environmental Science and Pollution*  
469 *Research* 27, 45722-45736 (2020).

470 163 Debska, B., Jaskulska, I. & Jaskulski, D. Method of tillage with the factor determining the  
471 quality of organic matter. *Agronomy* 10, 1250 (2020).

472 164 Rieder, Á. et al. Soil organic matter alteration velocity due to land-use change: A case study  
473 under conservation agriculture. *Sustainability* 10, 943 (2018).

474 165 Sun, B., Hallett, P. D., Caul, S., Daniell, T. J. & Hopkins, D. W. Distribution of soil carbon and  
475 microbial biomass in arable soils under different tillage regimes. *Plant and Soil* 338, 17-25  
476 (2011).

477 166 Elmi, A. A., Madramootoo, C., Hamel, C. & Liu, A. Denitrification and nitrous oxide to nitrous  
478 oxide plus dinitrogen ratios in the soil profile under three tillage systems. *Biology and Fertility*  
479 *of Soils* 38, 340-348 (2003).

480 167 Tang, H. et al. Impacts of short-term tillage and crop residue incorporation managements on soil  
481 microbial community in a double-cropping rice field. *Scientific Reports* 12, 2093 (2022).

- 482 168 Mchunu, C. N., Lorentz, S., Jewitt, G., Manson, A. & Chaplot, V. No-till impact on soil and soil  
483 organic carbon erosion under crop residue scarcity in Africa. *Soil Science Society of America*  
484 *Journal* 75, 1503-1512 (2011).
- 485 169 Mubekaphi, C. Soil organic carbon, glomalin related soil protein and related physical properties  
486 after 15 years of different management practices in a subtropical region of South Africa, (2019).
- 487 170 Rahmati, M. et al. Changes in soil organic carbon fractions and residence time five years after  
488 implementing conventional and conservation tillage practices. *Soil and Tillage Research* 200,  
489 104632 (2020).
- 490 171 Hao, Q., Cheng, B. & Jiang, C. Long-term tillage effects on soil organic carbon and dissolved  
491 organic carbon in a purple paddy soil of Southwest China. *Acta Ecologica Sinica* 33, 260-265  
492 (2013).
- 493 172 Si, P. et al. Effect of no-tillage with straw mulch and conventional tillage on soil organic carbon  
494 pools in Northern China. *Archives of Agronomy and Soil Science* 64, 398-408 (2018).
- 495 173 Hurisso, T. T., Norton, J. B. & Norton, U. Soil profile carbon and nitrogen in prairie, perennial  
496 grass-legume mixture and wheat-fallow production in the central High Plains, USA. *Agriculture,*  
497 *ecosystems & environment* 181, 179-187 (2013).
- 498 174 Carrillo-Gonzalez, R., Gonzalez-Chavez, M., Aitkenhead-Peterson, J., Hons, F. & Loeppert, R.  
499 Extractable DOC and DON from a dry-land long-term rotation and cropping system in Texas,  
500 USA. *Geoderma* 197, 79-86 (2013).
- 501 175 Gao, Y. et al. Effect of tillage practices on soil CO<sub>2</sub> emissions, microbial C-fixation, and  
502 C-degradation functional gene abundance in Northeast China. *Journal of Soils and Sediments* 23,  
503 446-458 (2023).
- 504 176 Jia, L. et al. Keystone microbiome in the rhizosphere soil reveals the effect of long-term  
505 conservation tillage on crop growth in the Chinese Loess Plateau. *Plant and Soil* 473, 457-472  
506 (2022).
- 507 177 Fisk, L., Barton, L., Maccarone, L., Jenkins, S. & Murphy, D. Seasonal dynamics of  
508 ammonia-oxidizing bacteria but not archaea influence soil nitrogen cycling in a semi-arid  
509 agricultural soil. *Scientific Reports* 12, 7299 (2022).
- 510 178 Sarker, M. R. et al. Conservation tillage and residue management improve soil health and crop  
511 productivity—Evidence from a rice-maize cropping system in Bangladesh. *Frontiers in*  
512 *Environmental Science* 10, 969819 (2022).
- 513 179 Li, N., Lei, W., Sheng, M., Long, J. & Han, Z. Straw amendment and soil tillage alter soil  
514 organic carbon chemical composition and are associated with microbial community structure.  
515 *European Journal of Soil Biology* 110, 103406 (2022).
- 516 180 Cui, J. et al. Nutrient availability is a dominant predictor of soil bacterial and fungal community  
517 composition after nitrogen addition in subtropical acidic forests. *PLoS One* 16, e0246263  
518 (2021).
- 519 181 Zhou, J. et al. Nitrogen addition affects soil respiration primarily through changes in microbial  
520 community structure and biomass in a subtropical natural forest. *Forests* 10, 435 (2019).
- 521 182 Zhang, H., Liu, Y., Zhou, Z. & Zhang, Y. Inorganic nitrogen addition affects soil respiration and  
522 belowground organic carbon fraction for a *Pinus tabuliformis* forest. *Forests* 10, 369 (2019).
- 523 183 Song, Y. et al. Short-term response of the soil microbial abundances and enzyme activities to  
524 experimental warming in a boreal peatland in Northeast China. *Sustainability* 11, 590 (2019).
- 525 184 Li, Y. et al. Divergent responses of soil carbon and nitrogen pools to short-term nitrogen

526 addition between two plantations in Northeast China. *International Journal of Agricultural and*  
527 *Biological Engineering* 12, 82-90 (2019).

528 185 Dong, D., Shi, C., Yan, S. & Ashraf, M. Effects of elevated atmospheric CO<sub>2</sub>, O<sub>3</sub> and soil  
529 phenanthrene on soil enzyme activities and microbial biomass. *Applied Ecology and*  
530 *Environmental Research* 17, 8501-8512 (2019).

531 186 Chen, L. et al. Differential responses of net N mineralization and nitrification to throughfall  
532 reduction in a *Castanopsis hystrix* plantation in southern China. *Forest Ecosystems* 6, 1-11  
533 (2019).

534 187 Zhou, S., Xiang, Y., Tie, L., Han, B. & Huang, C. Simulated nitrogen deposition significantly  
535 reduces soil respiration in an evergreen broadleaf forest in western China. *PLoS One* 13,  
536 e0204661 (2018).

537 188 Yue, P. et al. Impact of elevated precipitation, nitrogen deposition and warming on soil  
538 respiration in a temperate desert. *Biogeosciences* 15, 2007-2019 (2018).

539 189 Olatunji, O. A. et al. The responses of soil microbial community and enzyme activities of  
540 *Phoebe zhennan* cultivated under different soil moisture conditions to phosphorus addition.  
541 *iForest-Biogeosciences and Forestry* 11, 751 (2018).

542 190 Ma, J., Kang, F., Cheng, X. & Han, H. Response of soil organic carbon and nitrogen to nitrogen  
543 deposition in a *Larix principis-rupprechtii* plantation. *Scientific Reports* 8, 8638 (2018).

544 191 Lv, F., Xue, S., Wang, G. & Zhang, C. Nitrogen addition shifts the microbial community in the  
545 rhizosphere of *Pinus tabulaeformis* in Northwestern China. *PLoS One* 12, e0172382 (2017).

546 192 Hu, Y. et al. Climate change affects soil labile organic carbon fractions in a Tibetan alpine  
547 meadow. *Journal of Soils and Sediments* 17, 326-339 (2017).

548 193 van Gestel, N. C., Dhungana, N., Tissue, D. T. & Zak, J. C. Seasonal microbial and nutrient  
549 responses during a 5-year reduction in the daily temperature range of soil in a Chihuahuan  
550 Desert ecosystem. *Oecologia* 180, 265-277 (2016).

551 194 Chen, D. et al. Response of soil carbon and nitrogen to 15-year experimental warming in two  
552 alpine habitats (*kobresia* meadow and *potentilla* shrubland) on the Qinghai-Tibetan Plateau.  
553 *Polish Journal of Environmental Studies* 25, 2305-2313 (2016).

554 195 Song, Y. et al. Short-term effect of nitrogen addition on litter and soil properties in  
555 *Calamagrostis angustifolia* freshwater marshes of Northeast China. *Wetlands* 33, 505-513  
556 (2013).

557 196 Song, B. et al. Light and heavy fractions of soil organic matter in response to climate warming  
558 and increased precipitation in a temperate steppe. *PloS one* 7, e33217 (2012).

559 197 Li, L.-J., Zeng, D.-H., Yu, Z.-Y., Fan, Z.-P. & Mao, R. Soil microbial properties under N and P  
560 additions in a semi-arid, sandy grassland. *Biology and Fertility of Soils* 46, 653-658 (2010).

561 198 Carol Adair, E. & Burke, I. C. Plant phenology and life span influence soil pool dynamics:  
562 *Bromus tectorum* invasion of perennial C<sub>3</sub>-C<sub>4</sub> grass communities. *Plant and soil* 335, 255-269  
563 (2010).

564 199 Liu, Y. et al. Nitrogen addition promotes soil phosphorus availability in the subalpine forest of  
565 eastern Tibetan Plateau. *Journal of Soils and Sediments*, 1-11 (2022).

566 200 Wu, Y. et al. Nitrous oxide emissions from an alpine grassland as affected by nitrogen addition.  
567 *Atmosphere* 12, 976 (2021).

568 201 Dai, Y. et al. Response of soil bacterial communities to nitrogen and phosphorus additions in an  
569 age-sequence of subtropical forests. *iForest-Biogeosciences and Forestry* 14, 71 (2021).

- 570 202 Wang, J.-J. et al. Long-term nitrogen addition alters the composition of soil-derived dissolved  
571 organic matter. *ACS Earth and Space Chemistry* 4, 189-201 (2019).
- 572 203 Liu, X., Lamb, E. G. & Zhang, S. Nitrogen addition impacts on soil microbial stoichiometry are  
573 driven by changes in plant resource stoichiometry not by the composition of main microbial  
574 groups in an alpine meadow. *Biology and fertility of soils* 56, 261-271 (2020).
- 575 204 Choma, M. et al. Bacteria but not fungi respond to soil acidification rapidly and consistently in  
576 both a spruce and beech forest. *FEMS Microbiology Ecology* 96, fiae174 (2020).
- 577 205 Ataka, M., Sun, L., Nakaji, T., Katayama, A. & Hiura, T. Five-year nitrogen addition affects fine  
578 root exudation and its correlation with root respiration in a dominant species, *Quercus crispula*,  
579 of a cool temperate forest, Japan. *Tree physiology* 40, 367-376 (2020).
- 580 206 Phillips, C. A., Elberling, B. & Michelsen, A. Soil carbon and nitrogen stocks and turnover  
581 following 16 years of warming and litter addition. *Ecosystems* 22, 110-124 (2019).
- 582 207 Yuan, X. et al. Effects of short-term warming and nitrogen addition on the quantity and quality  
583 of dissolved organic matter in a subtropical *Cunninghamia lanceolata* plantation. *Plos one* 13,  
584 e0191403 (2018).
- 585 208 Jung, K., Kwak, J.-H., Gilliam, F. S. & Chang, S. X. Simulated N and S deposition affected soil  
586 chemistry and understory plant communities in a boreal forest in western Canada. *Journal of*  
587 *plant ecology* 11, 511-523 (2018).
- 588 209 Gong, Y., Wu, J., Vogt, J., Le, T. B. & Yuan, T. Combination of warming and vegetation  
589 composition change strengthens the environmental controls on N<sub>2</sub>O fluxes in a boreal peatland.  
590 *Atmosphere* 9, 480 (2018).
- 591 210 Chen, G.-t., Tu, L.-h., Chen, G.-s., Hu, J.-y. & Han, Z.-l. Effect of six years of nitrogen additions  
592 on soil chemistry in a subtropical *Pleiblastus amarus* forest, Southwest China. *Journal of*  
593 *forestry research* 29, 1657-1664 (2018).
- 594 211 Zhang, K. et al. Impact of nitrogen fertilization on soil–Atmosphere greenhouse gas exchanges  
595 in eucalypt plantations with different soil characteristics in southern China. *Plos one* 12,  
596 e0172142 (2017).
- 597 212 Wang, Y., Wang, H., He, J.-S. & Feng, X. Iron-mediated soil carbon response to water-table  
598 decline in an alpine wetland. *Nature communications* 8, 15972 (2017).
- 599 213 Ritson, J. P. et al. The effect of drought on dissolved organic carbon (DOC) release from  
600 peatland soil and vegetation sources. *Biogeosciences* 14, 2891-2902 (2017).
- 601 214 Niboyet, A., Bardoux, G., Barot, S. & Bloor, J. M. Elevated CO<sub>2</sub> mediates the short-term  
602 drought recovery of ecosystem function in low-diversity grassland systems. *Plant and soil* 420,  
603 289-302 (2017).
- 604 215 Lei, Z., Sun, H., Li, Q., Zhang, J. & Song, X. Effects of nitrogen deposition on soil dissolved  
605 organic carbon and nitrogen in Moso bamboo plantations strongly depend on management  
606 practices. *Forests* 8, 452 (2017).
- 607 216 Jia, X., Liu, T., Zhao, Y., He, Y. & Yang, M. Elevated atmospheric CO<sub>2</sub> affected photosynthetic  
608 products in wheat seedlings and biological activity in rhizosphere soil under cadmium stress.  
609 *Environmental Science and Pollution Research* 23, 514-526 (2016).
- 610 217 He, D. et al. Composition of the soil fungal community is more sensitive to phosphorus than  
611 nitrogen addition in the alpine meadow on the Qinghai-Tibetan Plateau. *Biology and Fertility of*  
612 *Soils* 52, 1059-1072 (2016).
- 613 218 Hasegawa, S., Macdonald, C. A. & Power, S. A. Elevated carbon dioxide increases soil nitrogen

614 and phosphorus availability in a phosphorus-limited Eucalyptus woodland. *Global Change*  
615 *Biology* 22, 1628-1643 (2016).

616 219 Carrillo, Y., Dijkstra, F. A., LeCain, D. & Pendall, E. Mediation of soil C decomposition by  
617 arbuscular mycorrhizal fungi in grass rhizospheres under elevated CO<sub>2</sub>. *Biogeochemistry* 127,  
618 45-55 (2016).

619 220 Cai, Y., Chang, S. X., Ma, B. & Bork, E. W. Watering increased DOC concentration but  
620 decreased N<sub>2</sub>O emission from a mixed grassland soil under different defoliation regimes.  
621 *Biology and Fertility of Soils* 52, 987-996 (2016).

622 221 Gao, Y., Zeng, X., Xie, Q. & Ma, X. Release of carbon and nitrogen from alpine soils during  
623 thawing periods in the eastern Qinghai-Tibet Plateau. *Water, Air, & Soil Pollution* 226, 1-9  
624 (2015).

625 222 Fang, H. et al. Elevated atmospheric carbon dioxide concentration stimulates soil microbial  
626 activity and impacts water-extractable organic carbon in an agricultural soil. *Biogeochemistry*  
627 122, 253-267 (2015).

628 223 Xu, M. et al. Low-level nitrogen addition promotes net methane uptake in a boreal forest across  
629 the Great Xing'an Mountain Region, China. *Forest Science* 60, 973-981 (2014).

630 224 Li, T., Tao, Q., Liang, C. & Yang, X. Elevated CO<sub>2</sub> concentration increase the mobility of Cd  
631 and Zn in the rhizosphere of hyperaccumulator *Sedum alfredii*. *Environmental science and*  
632 *pollution research* 21, 5899-5908 (2014).

633 225 Kane, E. S. et al. Peat porewater dissolved organic carbon concentration and lability increase  
634 with warming: a field temperature manipulation experiment in a poor-fen. *Biogeochemistry* 119,  
635 161-178 (2014).

636 226 Huang, J., Richard, H. & Zheng, S. Effects of nitrogen fertilization on soil labile carbon  
637 fractions of freshwater marsh soil in Northeast China. *International Journal of Environmental*  
638 *Science and Technology* 11, 2009-2014 (2014).

639 227 Delarue, F. et al. Indirect effects of experimental warming on dissolved organic carbon content  
640 in subsurface peat. *Journal of soils and sediments* 14, 1800-1805 (2014).

641 228 Lu, X. et al. Long-term nitrogen addition decreases carbon leaching in a nitrogen-rich forest  
642 ecosystem. *Biogeosciences* 10, 3931-3941 (2013).

643 229 Lovett, G. M., Arthur, M. A., Weathers, K. C., Fitzhugh, R. D. & Templer, P. H. Nitrogen  
644 addition increases carbon storage in soils, but not in trees, in an eastern US deciduous forest.  
645 *Ecosystems* 16, 980-1001 (2013).

646 230 Haei, M., Öquist, M. G., Ilstedt, U. & Laudon, H. The influence of soil frost on the quality of  
647 dissolved organic carbon in a boreal forest soil: combining field and laboratory experiments.  
648 *Biogeochemistry* 107, 95-106 (2012).

649 231 Carrillo, Y., Dijkstra, F. A., Pendall, E., Morgan, J. A. & Blumenthal, D. M. Controls over soil  
650 nitrogen pools in a semiarid grassland under elevated CO<sub>2</sub> and warming. *Ecosystems* 15,  
651 761-774 (2012).

652 232 Cusack, D. F., Silver, W. L., Torn, M. S. & McDowell, W. H. Effects of nitrogen additions on  
653 above-and belowground carbon dynamics in two tropical forests. *Biogeochemistry* 104, 203-225  
654 (2011).

655 233 Helliwell, R., Britton, A., Gibbs, S., Fisher, J. & Potts, J. Interactive effects of N deposition, land  
656 management and weather patterns on soil solution chemistry in a Scottish alpine heath.  
657 *Ecosystems* 13, 696-711 (2010).

- 658 234 Hagedorn, F. et al. Short-term responses of ecosystem carbon fluxes to experimental soil  
659 warming at the Swiss alpine treeline. *Biogeochemistry* 97, 7-19 (2010).
- 660 235 Junod, J. et al. Effect of irrigation levels on dissolved organic carbon soil distribution and the  
661 depth mobility of chlorpyrifos. *Chilean journal of agricultural research* 69, 435-444 (2009).
- 662 236 Fang, Y. et al. Large loss of dissolved organic nitrogen from nitrogen-saturated forests in  
663 subtropical China. *Ecosystems* 12, 33-45 (2009).
- 664 237 Kim, S.-Y. & Kang, H. Effects of elevated CO<sub>2</sub> on below-ground processes in temperate marsh  
665 microcosms. *Hydrobiologia* 605, 123-130 (2008).
- 666 238 Waldrop, M. P. & Zak, D. R. Response of oxidative enzyme activities to nitrogen deposition  
667 affects soil concentrations of dissolved organic carbon. *Ecosystems* 9, 921-933 (2006).
- 668 239 Scheuner, E. T. & Makeschin, F. Impact of atmospheric nitrogen deposition on carbon dynamics  
669 in two Scots pine forest soils of Northern Germany. *Plant and soil* 275, 43-54 (2005).
- 670 240 Marsh, A. S., Rasse, D. P., Drake, B. G. & Patrick Megonigal, J. Effect of elevated CO<sub>2</sub> on  
671 carbon pools and fluxes in a brackish marsh. *Estuaries* 28, 694-704 (2005).
- 672 241 Pregitzer, K. S., Zak, D. R., Burton, A. J., Ashby, J. A. & MacDonald, N. W. Chronic nitrate  
673 additions dramatically increase the export of carbon and nitrogen from northern hardwood  
674 ecosystems. *Biogeochemistry* 68, 179-197 (2004).
- 675 242 King, J. et al. Fine-root biomass and fluxes of soil carbon in young stands of paper birch and  
676 trembling aspen as affected by elevated atmospheric CO<sub>2</sub> and tropospheric O<sub>3</sub>. *Oecologia* 128,  
677 237-250 (2001).
- 678 243 Magill, A. H. et al. Long-term nitrogen additions and nitrogen saturation in two temperate  
679 forests. *Ecosystems* 3, 238-253 (2000).
- 680 244 Lamontagne, S. & Schiff, S. L. The Response of a Heterogeneous Upland Boreal Shield  
681 Catchment to a Short Term NO<sub>3</sub>-Addition. *Ecosystems* 2, 460-473 (1999).
- 682 245 McDowell, W. H., Currie, W. S., Aber, J. D. & Yang, Y. in *Biogeochemical Investigations at  
683 Watershed, Landscape, and Regional Scales: Refereed papers from BIOGEMON, The Third  
684 International Symposium on Ecosystem Behavior; Co-Sponsored by Villanova University and  
685 the Czech Geological Survey; held at Villanova University, Villanova Pennsylvania, USA, June  
686 21–25, 1997. 175-182 (Springer).*
- 687 246 Currie, W. S., Aber, J. D., McDowell, W. H., Boone, R. D. & Magill, A. H. Vertical transport of  
688 dissolved organic C and N under long-term N amendments in pine and hardwood forests.  
689 *Biogeochemistry* 35, 471-505 (1996).
- 690 247 Voigt, C. et al. Warming of subarctic tundra increases emissions of all three important  
691 greenhouse gases—carbon dioxide, methane, and nitrous oxide. *Global Change Biology* 23,  
692 3121-3138 (2017).
- 693 248 Basiliko, N., Moore, T. R., Jeannotte, R. & Bubier, J. L. Nutrient input and carbon and microbial  
694 dynamics in an ombrotrophic bog. *Geomicrobiology Journal* 23, 531-543 (2006).
- 695 249 Hu, Y.-L., Jung, K., Zeng, D.-H. & Chang, S. X. Nitrogen-and sulfur-deposition-altered soil  
696 microbial community functions and enzyme activities in a boreal mixedwood forest in western  
697 Canada. *Canadian Journal of Forest Research* 43, 777-784 (2013).
- 698 250 Strack, M., Munir, T. M. & Khadka, B. Shrub abundance contributes to shifts in dissolved  
699 organic carbon concentration and chemistry in a continental bog exposed to drainage and  
700 warming. *Ecohydrology* 12, e2100 (2019).
- 701 251 Fouché J., Keller, C., Allard, M. & Ambrosi, J. P. Increased CO<sub>2</sub> fluxes under warming tests

702 and soil solution chemistry in Histic and Turbic Cryosols, Salluit, Nunavik, Canada. *Soil*  
703 *Biology and Biochemistry* 68, 185-199 (2014).

704 252 Peplau, T., Schroeder, J., Gregorich, E. & Poeplau, C. Long-term geothermal warming reduced  
705 stocks of carbon but not nitrogen in a subarctic forest soil. *Global Change Biology* 27,  
706 5341-5355 (2021).

707 253 Gong, Y., Wu, J., Sey, A. A. & Le, T. B. Nitrogen addition (NH<sub>4</sub>NO<sub>3</sub>) mitigates the positive  
708 effect of warming on methane fluxes in a coastal bog. *Catena* 203, 105356 (2021).

709 254 Schleuss, P.-M. et al. Stoichiometric controls of soil carbon and nitrogen cycling after long-term  
710 nitrogen and phosphorus addition in a mesic grassland in South Africa. *Soil Biology and*  
711 *Biochemistry* 135, 294-303 (2019).

712 255 Widdig, M. et al. Microbial carbon use efficiency in grassland soils subjected to nitrogen and  
713 phosphorus additions. *Soil Biology and Biochemistry* 146, 107815 (2020).

714 256 Spohn, M. & Schleuss, P.-M. Addition of inorganic phosphorus to soil leads to desorption of  
715 organic compounds and thus to increased soil respiration. *Soil Biology and Biochemistry* 130,  
716 220-226 (2019).

717 257 Oulehle, F. et al. Soil–solution partitioning of DOC in acid organic soils: results from a UK field  
718 acidification and alkalization experiment. *European Journal of Soil Science* 64, 787-796 (2013).

719 258 Hagedorn, F., Kammer, A., Schmidt, M. W. & Goodale, C. L. Nitrogen addition alters  
720 mineralization dynamics of 13 C-depleted leaf and twig litter and reduces leaching of older  
721 DOC from mineral soil. *Global Change Biology* 18, 1412-1427 (2012).

722 259 Seifert-Monson, L. et al. Effects of sulfate deposition on pore water dissolved organic carbon,  
723 nutrients, and microbial enzyme activities in a northern peatland. *Soil Biology and Biochemistry*  
724 79, 91-99 (2014).

725 260 Wang, M. et al. Long-term warming increased microbial carbon use efficiency and turnover rate  
726 under conservation tillage system. *Soil Biology and Biochemistry* 172, 108770 (2022).

727 261 Niu, G. et al. Do long-term high nitrogen inputs change the composition of soil dissolved  
728 organic matter in a primary tropical forest? *Environmental Research Letters* 17, 095015 (2022).

729 262 Querejeta, J. I. et al. Lower relative abundance of ectomycorrhizal fungi under a warmer and  
730 drier climate is linked to enhanced soil organic matter decomposition. *New Phytologist* 232,  
731 1399-1413 (2021).

732 263 Wang, H. et al. Effects of simulated nitrogen deposition on soil active carbon fractions in a wet  
733 meadow in the Qinghai-Tibet Plateau. *Journal of Soil Science and Plant Nutrition* 22, 2943-2954  
734 (2022).

735 264 Yuan, X. et al. Effects of nitrogen addition on the concentration and composition of soil-based  
736 dissolved organic matter in subtropical *Pinus taiwanensis* forests. *Journal of Soils and Sediments*  
737 22, 1924-1937 (2022).

738 265 Zhang, J. et al. Ten years of warming increased plant-derived carbon accumulation in an East  
739 Asian monsoon forest. *Plant and Soil* 481, 349-365 (2022).

740 266 Lu, F. et al. Long-term phosphorus addition strongly weakens the carbon sink function of a  
741 temperate peatland. *Ecosystems* 26, 201-216 (2023).

742 267 Yang, Y. et al. Soil enzyme activity regulates the response of soil C fluxes to N fertilization in a  
743 temperate cultivated grassland. *Atmosphere* 13, 777 (2022).

744 268 Weng, X., Sui, X., Liu, Y., Yang, L. & Zhang, R. Effect of nitrogen addition on the carbon  
745 metabolism of soil microorganisms in a *Calamagrostis angustifolia* wetland of the Sanjiang



746 Plain, northeastern China. *Annals of Microbiology* 72, 18 (2022).

747 269 Dong, L., Berg, B., Gu, W., Wang, Z. & Sun, T. Effects of different forms of nitrogen addition  
748 on microbial extracellular enzyme activity in temperate grassland soil. *Ecological Processes* 11,  
749 36 (2022).

750 270 Li, L. et al. Joint control by soil moisture, functional genes and substrates on response of N<sub>2</sub>O  
751 flux to climate extremes in a semiarid grassland. *Agricultural and Forest Meteorology* 316,  
752 108854 (2022).

753 271 Liao, L. et al. Differential effects of nitrogen addition on the organic carbon fractions of  
754 rhizosphere and bulk soil based on a pot experiment. *Journal of Soils and Sediments* 23,  
755 103-117 (2023).

756 272 Wang, Y., Hu, Z., Liu, C., Wu, Z. & Chen, S. Methane emissions in japonica rice paddy fields  
757 under different elevated CO<sub>2</sub> concentrations. *Nutrient Cycling in Agroecosystems* 122, 173-189  
758 (2022).

759 273 Oestmann, J., Dettmann, U., Düvel, D. & Tiemeyer, B. Experimental warming increased  
760 greenhouse gas emissions of a near-natural peatland and Sphagnum farming sites. *Plant and Soil*  
761 480, 85-104 (2022).

762 274 Chen, W. et al. Divergent responses of soil microbial functional groups to long-term high  
763 nitrogen presence in the tropical forests. *Science of The Total Environment* 821, 153251 (2022).

764 275 Chen, Y. et al. The stimulatory effect of elevated CO<sub>2</sub> on soil respiration is unaffected by N  
765 addition. *Science of The Total Environment* 813, 151907 (2022).

766 276 Guo, Y. et al. Effects of nitrogen and water addition on N<sub>2</sub>O emissions in temperate grasslands,  
767 northern China. *Applied Soil Ecology* 177, 104548 (2022).

768 277 Li, N. et al. Combined livestock grazing-exclusion and global warming decreases nitrogen  
769 mineralization by changing soil microbial community in a Tibetan alpine meadow. *Catena* 219,  
770 106589 (2022).

771 278 Li, N. et al. Response of cbbL-harboring microorganisms to precipitation changes in a  
772 naturally-restored grassland. *Science of The Total Environment* 838, 156191 (2022).

773 279 Luo, L. et al. Effects of mycorrhiza and hyphae on the response of soil microbial community to  
774 warming in eastern Tibetan Plateau. *Science of The Total Environment* 837, 155498 (2022).

775 280 Wang, T. et al. Simultaneous Measurements of Dissolved Organic Carbon and Soil Respiration  
776 Reveal Reduced Soil Carbon Loss Under Nitrogen Addition in a Montane Forest. *Journal of*  
777 *Geophysical Research: Biogeosciences* 127, e2022JG006829 (2022).

778 281 Wu, G. et al. Effects of soil warming and straw return on soil organic matter and greenhouse gas  
779 fluxes in winter wheat seasons in the North China Plain. *Journal of Cleaner Production* 356,  
780 131810 (2022).

781 282 Yuan, X. et al. Relationship between soil bacterial communities and dissolved organic matter in  
782 a subtropical *Pinus taiwanensis* forest after short-term nitrogen addition. *Forest Ecology and*  
783 *Management* 512, 120165 (2022).

784 283 Wang, M. et al. Dissolved organic matter characteristics and important site factors in a  
785 subtropical mountain forest in central China. *Forest Science* 66, 49-57 (2020).

786 284 Teng, Z., Fan, W., Wang, H., Cao, X. & Xu, X. Monitoring soil microorganisms with  
787 community-level physiological profiles using Biolog EcoPlates™ in Chaohu lakeside wetland,  
788 East China. *Eurasian Soil Science* 53, 1142-1153 (2020).

789 285 Rousset, C., Clough, T. J., Grace, P. R., Rowlings, D. W. & Scheer, C. Soil type, bulk density

790 and drainage effects on relative gas diffusivity and N<sub>2</sub>O emissions. *Soil Research* 58, 726-736  
791 (2020).

792 286 Qin, X.-q. et al. Characterizing soil dissolved organic matter in typical soils from China using  
793 fluorescence EEM-PARAFAC and UV-visible absorption. *Aquatic Geochemistry* 26, 71-88  
794 (2020).

795 287 Lu, T., Wang, X. & Zhang, W. Total and dissolved soil organic and inorganic carbon and their  
796 relationships in typical loess cropland of Fengu Basin. *Geoscience Letters* 7, 1-13 (2020).

797 288 Kouchou, A. et al. Evaluation of the environmental and human health risk related to metallic  
798 contamination in agricultural soils in the Mediterranean semi-arid area (Saiss plain, Morocco).  
799 *Environmental earth sciences* 79, 1-22 (2020).

800 289 Kholodov, V. et al. Optical properties of the extractable organic matter fractions in typical  
801 chernozems of long-term field experiments. *Eurasian Soil Science* 53, 739-748 (2020).

802 290 Kharitonova, G. V., Kot, F. S. & Krutikova, V. O. Carbonate and concomitant microaggregation  
803 in irrigated Mediterranean soils of Israel. *Irrigation Science* 38, 431-447 (2020).

804 291 Jeanneau, L. et al. Water table dynamics control carbon losses from the destabilization of soil  
805 organic matter in a small, lowland agricultural catchment. *Soil Systems* 4, 2 (2019).

806 292 Imran, M. et al. Soil selenium transformation across different parent materials in Pothwar  
807 uplands of Pakistan. *Arabian Journal of Geosciences* 13, 1-16 (2020).

808 293 Ide, J. i. et al. Molecular composition of soil dissolved organic matter in recently-burned and  
809 long-unburned boreal forests. *International Journal of Wildland Fire* 29, 541-547 (2020).

810 294 Hailegnaw, N. S. et al. The role of biochar and soil properties in determining the available  
811 content of Al, Cu, Zn, Mn, and Cd in soil. *Agronomy* 10, 885 (2020).

812 295 Gök, G. & Gürbüz, O. A. Application of geostatistics for grid and random sampling schemes for  
813 a grassland in Nigde, Turkey. *Environmental monitoring and assessment* 192, 1-12 (2020).

814 296 Fovet, O., Cooper, D. M., Jones, D. L., Jones, T. G. & Evans, C. D. Dynamics of dissolved  
815 organic matter in headwaters: comparison of headwater streams with contrasting DOM and  
816 nutrient composition. *Aquatic sciences* 82, 1-12 (2020).

817 297 Curtin, D. et al. Exchangeable cation effects on hot water extractable carbon and nitrogen in  
818 agricultural soils. *Soil research* 58, 356-363 (2020).

819 298 Croat, S., DeSutter, T., Casey, F. & O'Brien, P. Phosphorus sorption and desorption in soils  
820 treated by thermal desorption. *Water, Air, & Soil Pollution* 231, 1-9 (2020).

821 299 Connolly, C. T., Cardenas, M. B., Burkart, G. A., Spencer, R. G. & McClelland, J. W.  
822 Groundwater as a major source of dissolved organic matter to Arctic coastal waters. *Nature*  
823 *Communications* 11, 1479 (2020).

824 300 Chibuikwe, G. et al. Denitrification capacity of hill country wet and dry area soils as influenced  
825 by dissolved organic carbon concentration and chemistry. *Wetlands* 40, 681-691 (2020).

826 301 Azam, A. et al. Changes in soil organic carbon fractions across a loess toposequence. *Journal of*  
827 *Soil Science and Plant Nutrition* 20, 1193-1202 (2020).

828 302 Zhang, H., Li, Y., Pang, M., Xi, M. & Kong, F. Responses of contents and structure of DOM to  
829 *Spartina alterniflora* invasion in Yanghe estuary wetland of Jiaozhou Bay, China. *Wetlands* 39,  
830 729-741 (2019).

831 303 Zeh, L., Limpens, J., Erhagen, B., Bragazza, L. & Kalbitz, K. Plant functional types and  
832 temperature control carbon input via roots in peatland soils. *Plant and Soil* 438, 19-38 (2019).

833 304 Wang, T., Zhao, X., Wang, C., Huang, Z. & Liu, S. Analysis of three-dimensional fluorescence

834 spectrum characteristics of water extractable organic matter in Mollisols after different years of  
835 cultivation. *Applied Ecology & Environmental Research* 17 (2019).

836 305 Thieme, L. et al. Dissolved organic matter characteristics of deciduous and coniferous forests  
837 with variable management: different at the source, aligned in the soil. *Biogeosciences* 16,  
838 1411-1432 (2019).

839 306 Stutz, K. P. et al. Lignin from white-rotted European beech deadwood and soil functions.  
840 *Biogeochemistry* 145, 81-105 (2019).

841 307 Ritson, J. et al. Sources of dissolved organic carbon (DOC) in a mixed land use catchment (Exe,  
842 UK). *Science of the total environment* 666, 165-175 (2019).

843 308 Pintaldi, E., Viglietti, D., D'Amico, M. E., Magnani, A. & Freppaz, M. Abiotic Parameters and  
844 pedogenesis as controlling factors for soil C and N cycling along an elevational gradient in a  
845 Subalpine Larch Forest (NW Italy). *Forests* 10, 614 (2019).

846 309 Petrash, D. A. et al. Spatially resolved soil solution chemistry in a central European  
847 atmospherically polluted high-elevation catchment. *Soil* 5, 205-221 (2019).

848 310 Peach, M. E., Ogden, L. A., Mora, E. A. & Friedland, A. J. Building houses and managing lawns  
849 could limit yard soil carbon for centuries. *Carbon balance and management* 14, 1-14 (2019).

850 311 Nie, X. et al. Effects of water erosion on soil organic carbon stability in the subtropical China.  
851 *Journal of soils and sediments* 19, 3564-3575 (2019).

852 312 Liu, J. et al. Rice-paddy field acts as a buffer system to decrease the terrestrial characteristics of  
853 dissolved organic matter exported from a typical small agricultural watershed in the Three  
854 Gorges Reservoir Area, China. *Environmental Science and Pollution Research* 26, 23873-23885  
855 (2019).

856 313 Li, S. et al. Compositional and chemical characteristics of dissolved organic matter in various  
857 types of cropped and natural Chinese soils. *Chemical and biological technologies in agriculture*  
858 6, 1-11 (2019).

859 314 Hunziker, M., Arnalds, O. & Kuhn, N. J. Evaluating the carbon sequestration potential of  
860 volcanic soils in southern Iceland after birch afforestation. *Soil* 5, 223-238 (2019).

861 315 Fu, J. et al. Dissolved organic carbon leaching from montane grasslands under contrasting  
862 climate, soil and management conditions. *Biogeochemistry* 145, 47-61 (2019).

863 316 Freppaz, M., Viglietti, D., Balestrini, R., Lonati, M. & Colombo, N. Climatic and pedoclimatic  
864 factors driving C and N dynamics in soil and surface water in the alpine tundra (NW-Italian  
865 Alps). *Nature Conservation* 34, 67-90 (2019).

866 317 Faghih, F., Emadi, M., Sadegh-Zadeh, F. & Bahmanyar, M. A. Long-term charcoal-induced  
867 changes to soil properties in temperate regions of northern Iran. *Journal of forestry research* 30,  
868 1063-1071 (2019).

869 318 Dublet, G. et al. Colloidal size and redox state of uranium species in the porewater of a pristine  
870 mountain wetland. *Environmental science & technology* 53, 9361-9369 (2019).

871 319 Drozdova, O. Y. et al. Organic Matter Transformation in the Conjugate Series of Surface Water  
872 in Northern Karelia. *Water resources* 46, 52-58 (2019).

873 320 Dalmagro, H. J. et al. Streams with riparian forest buffers versus impoundments differ in  
874 discharge and DOM characteristics for pasture catchments in Southern Amazonia. *Water* 11, 390  
875 (2019).

876 321 Chiu, T.-P., Huang, W.-S., Chen, T.-C. & Yeh, Y.-L. Fluorescence characteristics of dissolved  
877 organic matter (DOM) in percolation water and lateral seepage affected by soil solution (SS) in

878 a lysimeter test. *Sensors* 19, 4016 (2019).

879 322 Cao, Z. et al. Past aridity's effect on carbon mineralization potentials in grassland soils.  
880 *Biogeosciences* 16, 3605-3619 (2019).

881 323 Balestrini, R. et al. Dynamic of nitrogen and dissolved organic carbon in an alpine forested  
882 catchment: atmospheric deposition and soil solution trends. *Nature Conservation* 34, 41-66  
883 (2019).

884 324 Xiaodong Zheng, X. C., Chengming Liang, Y. H. & Jinshui Wu, Y. S. Influence of extractants  
885 and filter materials in the extraction of dissolved organic matter (DOM) from subtropical  
886 agricultural soil. *Emirates Journal of Food and Agriculture*, 165-172 (2018).

887 325 Zhang, Y., Duan, P., Zhang, P. & Li, M. Variations in cyanobacterial and algal communities and  
888 soil characteristics under biocrust development under similar environmental conditions. *Plant  
889 and soil* 429, 241-251 (2018).

890 326 Yang, Y. et al. Effects of different land types on soil enzyme activity in the Qinghai Lake region.  
891 *Wetlands* 38, 711-721 (2018).

892 327 Xu, B., Wang, J., Wu, N., Wu, Y. & Shi, F. Seasonal and interannual dynamics of soil microbial  
893 biomass and available nitrogen in an alpine meadow in the eastern part of Qinghai–Tibet Plateau,  
894 China. *Biogeosciences* 15, 567-579 (2018).

895 328 Wu, Y., Shaaban, M., Peng, Q. a., Zhou, A. q. & Hu, R. Impacts of earthworm activity on the  
896 fate of straw carbon in soil: a microcosm experiment. *Environmental Science and Pollution  
897 Research* 25, 11054-11062 (2018).

898 329 Song, G., Novotny, E. H., Richards, K. G. & Hayes, M. H. Characteristics of hydrophobic and  
899 hydrophilic acid fractions in drainage waters of undisturbed soil lysimeters. *Journal of soils and  
900 sediments* 18, 3197-3214 (2018).

901 330 Shen, Y. et al. Labile organic carbon pools and enzyme activities of *Pinus massoniana* plantation  
902 soil as affected by understory vegetation removal and thinning. *Scientific reports* 8, 573 (2018).

903 331 Rosa, E. & Debska, B. Seasonal changes in the content of dissolved organic matter in arable  
904 soils. *Journal of Soils and Sediments* 18, 2703-2714 (2018).

905 332 Nygaard, P. H., Strand, L. T. & Stuanes, A. O. Gap formation and dynamics after long-term  
906 steady state in an old-growth *Picea abies* stand in Norway: Above-and belowground interactions.  
907 *Ecology and evolution* 8, 462-476 (2018).

908 333 Nakhavali, M. et al. Representation of dissolved organic carbon in the JULES land surface  
909 model (vn4. 4\_JULES-DOCM). *Geoscientific Model Development* 11, 593-609 (2018).

910 334 Li, D. et al. Cadmium bioavailability well assessed by DGT and factors influencing cadmium  
911 accumulation in rice grains from paddy soils of three parent materials. *Journal of soils and  
912 sediments* 18, 2552-2561 (2018).

913 335 Kov, R. et al. A farm-scale investigation of the organic matter composition and soil chemistry of  
914 Andisols as influenced by land use and management. *Biogeochemistry* 140, 65-79 (2018).

915 336 Kobierski, M., Kondratowicz-Maciejewska, K., Banach-Szott, M., Wojewódzki, P. & Peñas  
916 Castejón, J. M. Humic substances and aggregate stability in rhizospheric and non-rhizospheric  
917 soil. *Journal of Soils and Sediments* 18, 2777-2789 (2018).

918 337 Homyak, P. M. et al. Effects of altered dry season length and plant inputs on soluble soil carbon.  
919 *Ecology* 99, 2348-2362 (2018).

920 338 Guo, Y., Song, C., Tan, W., Wang, X. & Lu, Y. Hydrological processes and permafrost regulate  
921 magnitude, source and chemical characteristics of dissolved organic carbon export in a peatland

922 catchment of northeastern China. *Hydrology and Earth System Sciences* 22, 1081-1093 (2018).

923 339 Glina, B., Bogacz, A., Mendyk, Ł., Bojko, O. & Nowak, M. Effectiveness of restoration of a  
924 degraded shallow mountain fen after five years. (2018).

925 340 Costa, E. N. D. d., Landim de Souza, M. F., Lima Marrocos, P. C., Lobao, D. & Lopes da Silva,  
926 D. M. Soil organic matter and CO<sub>2</sub> fluxes in small tropical watersheds under forest and cacao  
927 agroforestry. *PloS one* 13, e0200550 (2018).

928 341 Barcellos, D., O'Connell, C. S., Silver, W., Meile, C. & Thompson, A. Hot spots and hot  
929 moments of soil moisture explain fluctuations in iron and carbon cycling in a humid tropical  
930 forest soil. *Soil Systems* 2, 59 (2018).

931 342 Banach-Szott, M., Kondratowicz-Maciejewska, K. & Kobierski, M. Humic substances in  
932 Fluvisols of the Lower Vistula floodplain, North Poland. *Environmental Science and Pollution*  
933 *Research* 25, 23992-24002 (2018).

934 343 AlMulla, A. A., Jones, D. & Roberts, P. Substrate influences temperature sensitivity of dissolved  
935 organic carbon (DOC) and nitrogen (DON) mineralization in arid agricultural soils. *Soil*  
936 *Systems* 2, 28 (2018).

937 344 Wang, J., Song, C., Hou, A. & Xi, F. Methane emission potential from freshwater marsh soils of  
938 Northeast China: response to simulated freezing-thawing cycles. *Wetlands* 37, 437-445 (2017).

939 345 Wang, C., Tong, C., Chambers, L. G. & Liu, X. Identifying the salinity thresholds that impact  
940 greenhouse gas production in subtropical tidal freshwater marsh soils. *Wetlands* 37, 559-571  
941 (2017).

942 346 Tang, J., Zhang, Y., Zha, Y., Li, X. & Fan, S. Oxalate enhances desorption of perfluorooctane  
943 sulfonate from soils and sediments. *Water, Air, & Soil Pollution* 228, 1-11 (2017).

944 347 Sanderman, J. & Kramer, M. G. Dissolved organic matter retention in volcanic soils with  
945 contrasting mineralogy: a column sorption experiment. *Biogeochemistry* 135, 293-306 (2017).

946 348 Raudina, T. V. et al. Dissolved organic carbon and major and trace elements in peat porewater of  
947 sporadic, discontinuous, and continuous permafrost zones of western Siberia. *Biogeosciences* 14,  
948 3561-3584 (2017).

949 349 Qiu, J. & Turner, M. G. Effects of non-native Asian earthworm invasion on temperate forest and  
950 prairie soils in the Midwestern US. *Biological Invasions* 19, 73-88 (2017).

951 350 Puissant, J. et al. Climate change effects on the stability and chemistry of soil organic carbon  
952 pools in a subalpine grassland. *Biogeochemistry* 132, 123-139 (2017).

953 351 Morling, K., Raeke, J., Kamjunke, N., Reemtsma, T. & Tittel, J. Tracing aquatic priming effect  
954 during microbial decomposition of terrestrial dissolved organic carbon in chemostat experiments.  
955 *Microbial ecology* 74, 534-549 (2017).

956 352 McDonald, G. et al. A survey of total and dissolved organic carbon in alkaline soils of southern  
957 Australia. *Soil Research* 55, 617-629 (2017).

958 353 Li, Z. et al. Effects of moso bamboo (*Phyllostachys edulis*) invasions on soil nitrogen cycles  
959 depend on invasion stage and warming. *Environmental Science and Pollution Research* 24,  
960 24989-24999 (2017).

961 354 Li, Y., Wang, Y., Xu, S., Hu, B. & Wang, Z.-L. Effects of mariculture and solar-salt production  
962 on sediment microbial community structure in a coastal wetland. *Journal of Coastal Research* 33,  
963 573-582 (2017).

964 355 Jiskra, M., Wiederhold, J. G., Skjellberg, U., Kronberg, R.-M. & Kretzschmar, R. Source tracing  
965 of natural organic matter bound mercury in boreal forest runoff with mercury stable isotopes.

966 Environmental Science: Processes & Impacts 19, 1235-1248 (2017).

967 356 Jiang, X. et al. Colloid-bound and dissolved phosphorus species in topsoil water extracts along a  
968 grassland transect from Cambisol to Stagnosol. *Biogeosciences* 14, 1153-1164 (2017).

969 357 Ide, J. i. et al. Spatial variations in the molecular diversity of dissolved organic matter in water  
970 moving through a boreal forest in eastern Finland. *Scientific reports* 7, 42102 (2017).

971 358 Cuske, M., Karczewska, A. & Gałka, B. Speciation of Cu, Zn, and Pb in Soil Solutions  
972 Extracted from Strongly Polluted Soils Treated with Organic Materials. *Polish Journal of  
973 Environmental Studies* 26 (2017).

974 359 Conner, L. G., Gill, R. A. & Harvey, J. T. Earlier snowmelt accompanied by warmer soil  
975 temperatures in mid-latitude aspen forest and subalpine meadow: Implications for soil carbon.  
976 *Plant and Soil* 417, 275-285 (2017).

977 360 Cheng, X., Yu, M. & Wang, G. G. Effects of thinning on soil organic carbon fractions and soil  
978 properties in *Cunninghamia lanceolata* stands in eastern China. *Forests* 8, 198 (2017).

979 361 Cao, Q. et al. Factors affecting distribution patterns of organic carbon in sediments at regional  
980 and national scales in China. *Scientific reports* 7, 5497 (2017).

981 362 Broder, T., Knorr, K.-H. & Biester, H. Changes in dissolved organic matter quality in a peatland  
982 and forest headwater stream as a function of seasonality and hydrologic conditions. *Hydrology  
983 and Earth System Sciences* 21, 2035-2051 (2017).

984 363 Bojko, O. et al. Labile and stabile soil organic carbon fractions in surface horizons of mountain  
985 soils—relationships with vegetation and altitude. *Journal of Mountain Science* 14, 2391-2405  
986 (2017).

987 364 Yuan, H.-Y. et al. Geographic distance and amorphous iron affect the abundance and distribution  
988 of Geobacteraceae in paddy soils in China. *Journal of Soils and Sediments* 16, 2657-2665  
989 (2016).

990 365 Yang, C., Wang, Y., Jing, Y. & Li, J. The impact of land use on riparian soil dissolved organic  
991 matter and on streamwater quality on Chongming Island, China. *Regional Environmental  
992 Change* 16, 2399-2408 (2016).

993 366 Wu, H., Xu, X., Duan, C., Li, T. & Cheng, W. Synergistic effects of dissolved organic carbon  
994 and inorganic nitrogen on methane uptake in forest soils without and with freezing treatment.  
995 *Scientific Reports* 6, 32555 (2016).

996 367 Wang, J.-J., Jiao, Y., Rhew, R. C. & Chow, A. T. Haloform formation in coastal wetlands along a  
997 salinity gradient at South Carolina, United States. *Environmental Chemistry* 13, 745-756 (2016).

998 368 Vázquez, C. et al. Land use impact on chemical and spectroscopical characteristics of soil  
999 organic matter in an arid ecosystem. *Environmental Earth Sciences* 75, 1-13 (2016).

1000 369 Thieme, L., Graeber, D., Kaupenjohann, M. & Siemens, J. Fast-freezing with liquid nitrogen  
1001 preserves bulk dissolved organic matter concentrations, but not its composition. *Biogeosciences*  
1002 13, 4697-4705 (2016).

1003 370 Supriatin, S., Weng, L. & Comans, R. N. Selenium-rich dissolved organic matter determines  
1004 selenium uptake in wheat grown on Low-selenium arable land soils. *Plant and Soil* 408, 73-94  
1005 (2016).

1006 371 Rouwane, A., Rabiet, M., Grybos, M., Bernard, G. & Guibaud, G. Effects of NO<sub>3</sub><sup>-</sup> and PO<sub>4</sub><sup>3-</sup>  
1007 on the release of geogenic arsenic and antimony in agricultural wetland soil: a field and  
1008 laboratory approach. *Environmental Science and Pollution Research* 23, 4714-4728 (2016).

1009 372 Ogrinc, N. et al. Inorganic and organic carbon dynamics in forested soils developed on

- 1010 contrasting geology in Slovenia—A stable isotope approach. *Journal of soils and sediments* 16,  
1011 382-395 (2016).
- 1012 373 Mo, Q. et al. Reforestation in southern China: revisiting soil N mineralization and nitrification  
1013 after 8 years restoration. *Scientific Reports* 6, 19770 (2016).
- 1014 374 Ma, W. et al. Stability of soil organic carbon and potential carbon sequestration at eroding and  
1015 deposition sites. *Journal of Soils and Sediments* 16, 1705-1717 (2016).
- 1016 375 Liao, S. et al. Water, rather than temperature, dominantly impacts how soil fauna affect  
1017 dissolved carbon and nitrogen release from fresh litter during early litter decomposition. *Forests*  
1018 7, 249 (2016).
- 1019 376 Klimek, B., Chodak, M., Jaźwa, M. & Niklińska, M. Functional diversity of soil microbial  
1020 communities in boreal and temperate Scots pine forests. *European Journal of Forest Research*  
1021 135, 731-742 (2016).
- 1022 377 Karl, A. D., Merwin, I. A., Brown, M. G., Hervieux, R. A. & Heuvel, J. E. V. Under-vine  
1023 management impacts soil properties and leachate composition in a New York State Vineyard.  
1024 *HortScience* 51, 941-949 (2016).
- 1025 378 Julian, P., Gu, B. & Wright, A. L. Mercury stoichiometric relationships in a subtropical peatland.  
1026 *Water, Air, & Soil Pollution* 227, 1-16 (2016).
- 1027 379 Jones, T. G., Evans, C. D., Jones, D. L., Hill, P. W. & Freeman, C. Transformations in DOC  
1028 along a source to sea continuum; impacts of photo-degradation, biological processes and mixing.  
1029 *Aquatic Sciences* 78, 433-446 (2016).
- 1030 380 Joly, F.-X., Fromin, N., Kiikkilä O. & Hätenschwiler, S. Diversity of leaf litter leachates from  
1031 temperate forest trees and its consequences for soil microbial activity. *Biogeochemistry* 129,  
1032 373-388 (2016).
- 1033 381 Hu, Z. et al. A comparison of methane emissions following rice paddies conversion to crab-fish  
1034 farming wetlands in southeast China. *Environmental Science and Pollution Research* 23,  
1035 1505-1515 (2016).
- 1036 382 Hofmann, K., Lamprecht, A., Pauli, H. & Illmer, P. Distribution of prokaryotic abundance and  
1037 microbial nutrient cycling across a high-alpine altitudinal gradient in the Austrian Central Alps  
1038 is affected by vegetation, temperature, and soil nutrients. *Microbial ecology* 72, 704-716 (2016).
- 1039 383 Hanan, E. J., D'Antonio, C. M., Roberts, D. A. & Schimel, J. P. Factors regulating nitrogen  
1040 retention during the early stages of recovery from fire in coastal chaparral ecosystems.  
1041 *Ecosystems* 19, 910-926 (2016).
- 1042 384 Gómez-Gener, L. et al. When water vanishes: magnitude and regulation of carbon dioxide  
1043 emissions from dry temporary streams. *Ecosystems* 19, 710-723 (2016).
- 1044 385 Gerschlauser, F. et al. Gross nitrogen turnover of natural and managed tropical ecosystems at Mt.  
1045 Kilimanjaro, Tanzania. *Ecosystems* 19, 1271-1288 (2016).
- 1046 386 Fuss, C. B. et al. Nitrate and dissolved organic carbon mobilization in response to soil freezing  
1047 variability. *Biogeochemistry* 131, 35-47 (2016).
- 1048 387 Dunn, C., Jones, T. G., Roberts, S. & Freeman, C. Plant species effects on the carbon storage  
1049 capabilities of a blanket bog complex. *Wetlands* 36, 47-58 (2016).
- 1050 388 Burger, M., Haden, V. R., Chen, H., Six, J. & Horwath, W. R. Stand age affects emissions of N<sub>2</sub>  
1051 O in flood-irrigated alfalfa: a comparison of field measurements, DNDC model simulations and  
1052 IPCC Tier 1 estimates. *Nutrient Cycling in Agroecosystems* 106, 335-345 (2016).
- 1053 389 Wei, H. et al. Are variations in heterotrophic soil respiration related to changes in substrate

- 1054 availability and microbial biomass carbon in the subtropical forests? *Scientific Reports* 5, 18370  
1055 (2015).
- 1056 390 Wang, G. et al. Distribution of dissolved organic carbon and KMnO<sub>4</sub>-oxidizable carbon along  
1057 the low-to-high intertidal gradient in a mangrove forest. *Journal of Soils and Sediments* 15,  
1058 2199-2209 (2015).
- 1059 391 Tsai, C.-W., Tian, G. & Chiu, C.-Y. Great fraction of dissolved organic C and N in the primary  
1060 per-humid *Chamaecyparis* forest soil. *Botanical Studies* 56, 1-9 (2015).
- 1061 392 Tong, C., Huang, J. & Jia, Y. Small-scale spatial variability of soil methane production potential  
1062 and porewater characteristics in an estuarine *Phragmites australis* marsh. *Journal of Coastal*  
1063 *Research* 31, 994-1004 (2015).
- 1064 393 Tirado-Corbalán R., Anderson, R. G., Wang, D. & Ayars, J. E. Soil carbon and nitrogen stocks of  
1065 different Hawaiian sugarcane cultivars. *Agronomy* 5, 239-261 (2015).
- 1066 394 Rákosy, M. & Filep, T. Factors determining Cd, Co, Cr, Cu, Ni, Mn, Pb and Zn mobility in  
1067 uncontaminated arable and forest surface soils in Hungary. *Environmental Earth Sciences* 74,  
1068 6805-6817 (2015).
- 1069 395 Pu, X. et al. Responses of soil carbon and nitrogen to successive land use conversion in  
1070 seasonally frozen zones. *Plant and soil* 387, 117-130 (2015).
- 1071 396 Liao, S. et al. Soil fauna affects dissolved carbon and nitrogen in foliar litter in alpine forest and  
1072 alpine meadow. *Plos one* 10, e0139099 (2015).
- 1073 397 Levia, D. F. et al. Calcium and aluminum cycling in a temperate broadleaved deciduous forest of  
1074 the eastern USA: relative impacts of tree species, canopy state, and flux type. *Environmental*  
1075 *monitoring and assessment* 187, 1-13 (2015).
- 1076 398 KOCINIEWSKA, K. Soil quality assessment of Phaeozems and Luvisols from the Kujawy  
1077 region (central Poland). *Soil Science Annual* 66, 111-118 (2015).
- 1078 399 Kaňa, J., Tahovská, K., Kopáček, J. & Šantrůčková, H. Excess of organic carbon in mountain  
1079 spruce forest soils after bark beetle outbreak altered microbial N transformations and mitigated  
1080 N-saturation. *PLoS One* 10, e0134165 (2015).
- 1081 400 Chávez-Vergara, B. M., González-Rodríguez, A., Etchevers, J. D., Oyama, K. & García-Oliva, F.  
1082 Foliar nutrient resorption constrains soil nutrient transformations under two native oak species  
1083 in a temperate deciduous forest in Mexico. *European Journal of Forest Research* 134, 803-817  
1084 (2015).
- 1085 401 Bradová M. et al. The variations of aluminium species in mountainous forest soils and its  
1086 implications to soil acidification. *Environmental Science and Pollution Research* 22,  
1087 16676-16687 (2015).
- 1088 402 Armstrong, A., Waldron, S., Ostle, N. J., Richardson, H. & Whitaker, J. Biotic and abiotic  
1089 factors interact to regulate northern peatland carbon cycling. *Ecosystems* 18, 1395-1409 (2015).
- 1090 403 Zhang, S. et al. Changes in pH, dissolved organic matter and Cd species in the rhizosphere soils  
1091 of Cd phytostabilizer *Athyrium wardii* (Hook.) Makino involved in Cd tolerance and  
1092 accumulation. *Environmental Science and Pollution Research* 21, 4605-4613 (2014).
- 1093 404 Yuan, J., Ding, W., Liu, D., Xiang, J. & Lin, Y. Methane production potential and methanogenic  
1094 archaea community dynamics along the *Spartina alterniflora* invasion chronosequence in a  
1095 coastal salt marsh. *Applied microbiology and biotechnology* 98, 1817-1829 (2014).
- 1096 405 Ukonmaanaho, L., Starr, M., Lindroos, A.-J. & Nieminen, T. M. Long-term changes in acidity  
1097 and DOC in throughfall and soil water in Finnish forests. *Environmental monitoring and*



1098 assessment 186, 7733-7752 (2014).

1099 406 Tiemeyer, B. & Kahle, P. Nitrogen and dissolved organic carbon (DOC) losses from an  
1100 artificially drained grassland on organic soils. *Biogeosciences* 11, 4123-4137 (2014).

1101 407 Scheibe, A. & Gleixner, G. Influence of litter diversity on dissolved organic matter release and  
1102 soil carbon formation in a mixed beech forest. *PloS one* 9, e114040 (2014).

1103 408 Ohno, T. et al. Molecular composition and biodegradability of soil organic matter: a case study  
1104 comparing two new England forest types. *Environmental science & technology* 48, 7229-7236  
1105 (2014).

1106 409 Liu, T.-Z., Liu, C.-Q., Lang, Y.-C. & Ding, H. Dissolved organic carbon and its carbon isotope  
1107 compositions in hill slope soils of the karst area of southwest China: Implications for carbon  
1108 dynamics in limestone soil. *Geochemical Journal* 48, 277-285 (2014).

1109 410 Liu, D., Ding, W., Yuan, J., Xiang, J. & Lin, Y. Substrate and/or substrate-driven changes in the  
1110 abundance of methanogenic archaea cause seasonal variation of methane production potential in  
1111 species-specific freshwater wetlands. *Applied microbiology and biotechnology* 98, 4711-4721  
1112 (2014).

1113 411 He, D. & Ruan, H. Long term effect of land reclamation from lake on chemical composition of  
1114 soil organic matter and its mineralization. *Plos one* 9, e99251 (2014).

1115 412 Gao, J., Zhang, X., Lei, G. & Wang, G. Soil organic carbon and its fractions in relation to  
1116 degradation and restoration of wetlands on the Zoigê Plateau, China. *Wetlands* 34, 235-241  
1117 (2014).

1118 413 Franchini, A. G., Erny, I. & Zeyer, J. Spatial variability of methane emissions from Swiss alpine  
1119 fens. *Wetlands ecology and management* 22, 383-397 (2014).

1120 414 Fink, J. R. et al. Chemical and mineralogical changes in a Brazilian Rhodic Paleudult under  
1121 different land use and managements. *Revista Brasileira de Ciência do Solo* 38, 1304-1314  
1122 (2014).

1123 415 Ding, Y., Cawley, K. M., Da Cunha, C. N. & Jaffé R. Environmental dynamics of dissolved  
1124 black carbon in wetlands. *Biogeochemistry* 119, 259-273 (2014).

1125 416 Lim Kim Choo, L. N. & Ahmed, O. H. Partitioning carbon dioxide emission and assessing  
1126 dissolved organic carbon leaching of a drained peatland cultivated with pineapple at Saratok,  
1127 Malaysia. *The Scientific World Journal* 2014, 906021 (2014).

1128 417 Bhadha, J. H., Lang, T. A. & Daroub, S. H. Seasonal delivery of organic matter and metals to  
1129 farm canals: effect on sediment phosphorus storage capacity. *Journal of soils and sediments* 14,  
1130 991-1003 (2014).

1131 418 Xu, J., Yang, S., Peng, S., Wei, Q. & Gao, X. Solubility and leaching risks of organic carbon in  
1132 paddy soils as affected by irrigation managements. *The Scientific World Journal* 2013, 546750  
1133 (2013).

1134 419 Wei, S. & Twardowska, I. Main rhizosphere characteristics of the Cd hyperaccumulator *Rorippa*  
1135 *globosa* (Turcz.) Thell. *Plant and soil* 372, 669-681 (2013).

1136 420 Wang, F. et al. Seedling growth and soil nutrient availability in exotic and native tree species:  
1137 implications for afforestation in southern China. *Plant and Soil* 364, 207-218 (2013).

1138 421 Salek-Gilani, S., Raiesi, F., Tahmasebi, P. & Ghorbani, N. Soil organic matter in restored  
1139 rangelands following cessation of rainfed cropping in a mountainous semi-arid landscape.  
1140 *Nutrient cycling in agroecosystems* 96, 215-232 (2013).

1141 422 Marañón-Jiménez, S. & Castro, J. Effect of decomposing post-fire coarse woody debris on soil

- 1142 fertility and nutrient availability in a Mediterranean ecosystem. *Biogeochemistry* 112, 519-535  
 1143 (2013).
- 1144 423 Knorr, K.-H. DOC-dynamics in a small headwater catchment as driven by redox fluctuations  
 1145 and hydrological flow paths—are DOC exports mediated by iron reduction/oxidation cycles?  
 1146 *Biogeosciences* 10, 891-904 (2013).
- 1147 424 Huang, W. et al. Dissolved organic carbon in headwater streams and riparian soil organic carbon  
 1148 along an altitudinal gradient in the Wuyi Mountains, China. *PLoS One* 8, e78973 (2013).
- 1149 425 Farrell, M. et al. Oligopeptides represent a preferred source of organic N uptake: a global  
 1150 phenomenon? *Ecosystems* 16, 133-145 (2013).
- 1151 426 De Marco, A., Arena, C., Giordano, M. & Virzo De Santo, A. Impact of the invasive tree black  
 1152 locust on soil properties of Mediterranean stone pine-holm oak forests. *Plant and soil* 372,  
 1153 473-486 (2013).
- 1154 427 Bolan, N., Kunhikrishnan, A. & Gibbs, J. Rhizoreduction of arsenate and chromate in Australian  
 1155 native grass, shrub and tree vegetation. *Plant and soil* 367, 615-625 (2013).
- 1156 428 Bi, R., Lu, Q., Yu, W., Yuan, Y. & Zhou, S. Electron transfer capacity of soil dissolved organic  
 1157 matter and its potential impact on soil respiration. *Journal of Soils and Sediments* 13, 1553-1560  
 1158 (2013).
- 1159 429 Bhattacharyya, P. et al. Net ecosystem CO<sub>2</sub> exchange and carbon cycling in tropical lowland  
 1160 flooded rice ecosystem. *Nutrient cycling in agroecosystems* 95, 133-144 (2013).
- 1161 430 Yang, Y. et al. Dissolved organic carbon in association with water soluble nutrients and metals in  
 1162 soils from Lake Okeechobee Watershed, South Florida. *Water, Air, & Soil Pollution* 223,  
 1163 4075-4088 (2012).
- 1164 431 Wang, A. et al. Abundance and composition dynamics of soil ammonia-oxidizing archaea in an  
 1165 alpine fir forest on the eastern Tibetan Plateau of China. *Canadian Journal of Microbiology* 58,  
 1166 572-580 (2012).
- 1167 432 Qi, Y. et al. Effects of a conversion from grassland to cropland on the different soil organic  
 1168 carbon fractions in Inner Mongolia, China. *Journal of Geographical Sciences* 22, 315-328  
 1169 (2012).
- 1170 433 Liebner, S., Schwarzenbach, S. P. & Zeyer, J. Methane emissions from an alpine fen in central  
 1171 Switzerland. *Biogeochemistry* 109, 287-299 (2012).
- 1172 434 Hossain, M. et al. Spatial heterogeneity and kinetic regulation of arsenic dynamics in mangrove  
 1173 sediments: the Sundarbans, Bangladesh. *Environmental science & technology* 46, 8645-8652  
 1174 (2012).
- 1175 435 Ginzburg, O. & Steinberger, Y. Effects of forest wildfire on soil microbial-community activity  
 1176 and chemical components on a temporal-seasonal scale. *Plant and soil* 360, 243-257 (2012).
- 1177 436 Fasching, C. & Battin, T. J. Exposure of dissolved organic matter to UV-radiation increases  
 1178 bacterial growth efficiency in a clear-water Alpine stream and its adjacent groundwater. *Aquatic  
 1179 Sciences* 74, 143-153 (2012).
- 1180 437 Tu, C.-L., Liu, C.-Q., Lu, X.-H., Yuan, J. & Lang, Y.-C. Sources of dissolved organic carbon in  
 1181 forest soils: evidences from the differences of organic carbon concentration and isotope  
 1182 composition studies. *Environmental Earth Sciences* 63, 723-730 (2011).
- 1183 438 Senga, Y. et al. Vertical profiles of DIN, DOC, and microbial activities in the wetland soil of  
 1184 Kushiro Mire, northeastern Japan. *Limnology* 12, 17-23 (2011).
- 1185 439 Löffgren, S. et al. Recovery of soil water, groundwater, and streamwater from acidification at the

- 1186 Swedish Integrated Monitoring catchments. *Ambio* 40, 836-856 (2011).
- 1187 440 Liu, D., Ding, W., Jia, Z. & Cai, Z. Relation between methanogenic archaea and methane  
1188 production potential in selected natural wetland ecosystems across China. *Biogeosciences* 8,  
1189 329-338 (2011).
- 1190 441 Kunhikrishnan, A., Bolan, N. S. & Naidu, R. Phytoavailability of copper in the presence of  
1191 recycled water sources. *Plant and soil* 348, 425-438 (2011).
- 1192 442 Hur, J. Microbial changes in selected operational descriptors of dissolved organic matters from  
1193 various sources in a watershed. *Water, Air, & Soil Pollution* 215, 465-476 (2011).
- 1194 443 Groffman, P. M. et al. Snow depth, soil freezing and nitrogen cycling in a northern hardwood  
1195 forest landscape. *Biogeochemistry* 102, 223-238 (2011).
- 1196 444 B árcenas-Moreno, G., Garc á-Orenes, F., Mataix-Solera, J., Mataix-Beneyto, J. & B áãth, E. Soil  
1197 microbial recolonisation after a fire in a Mediterranean forest. *Biology and Fertility of soils* 47,  
1198 261-272 (2011).
- 1199 445 Yu, X., Zhang, Y., Zhao, H., Lu, X. & Wang, G. Freeze-thaw effects on sorption/desorption of  
1200 dissolved organic carbon in wetland soils. *Chinese Geographical Science* 20, 209-217 (2010).
- 1201 446 Wu, Y., Clarke, N. & Mulder, J. Dissolved organic nitrogen concentrations and ratios of  
1202 dissolved organic carbon to dissolved organic nitrogen in throughfall and soil waters in Norway  
1203 spruce and Scots pine forest stands throughout Norway. *Water, Air, & Soil Pollution* 210,  
1204 171-186 (2010).
- 1205 447 Tejneck ý, V. et al. Seasonal variation of water extractable aluminium forms in acidified forest  
1206 organic soils under different vegetation cover. *Biogeochemistry* 101, 151-163 (2010).
- 1207 448 Schmidt, B. H., Wang, C.-P., Chang, S.-C. & Matzner, E. High precipitation causes large fluxes  
1208 of dissolved organic carbon and nitrogen in a subtropical montane *Chamaecyparis* forest in  
1209 Taiwan. *Biogeochemistry* 101, 243-256 (2010).
- 1210 449 Roux-Michollet, D., Dudal, Y., Jocteur-Monrozier, L. & Czarnes, S. Steam treatment of surface  
1211 soil: how does it affect water-soluble organic matter, C mineralization, and bacterial community  
1212 composition? *Biology and fertility of soils* 46, 607-616 (2010).
- 1213 450 Oyanagi, N. & Nakata, M. Dynamics of dissolved ions in the soil of abandoned terraced paddy  
1214 fields in Sado Island, Japan. *Paddy and Water Environment* 8, 121-129 (2010).
- 1215 451 Cloutier-Hurteau, B., Turmel, M.-C., Sauv é S. & Courchesne, F. The speciation of  
1216 water-soluble Al and Zn in the rhizosphere of forest soils. *Journal of Environmental Monitoring*  
1217 12, 1274-1286 (2010).
- 1218 452 Chu, H. & Grogan, P. Soil microbial biomass, nutrient availability and nitrogen mineralization  
1219 potential among vegetation-types in a low arctic tundra landscape. *Plant and soil* 329, 411-420  
1220 (2010).
- 1221 453 Chen, D., Zhang, Y., Lin, Y., Zhu, W. & Fu, S. Changes in belowground carbon in *Acacia*  
1222 *crassicarpa* and *Eucalyptus urophylla* plantations after tree girdling. *Plant and Soil* 326, 123-135  
1223 (2010).
- 1224 454 Zaccone, C., D'Orazio, V., Shotyk, W. & Miano, T. M. Chemical and spectroscopic  
1225 investigation of porewater and aqueous extracts of corresponding peat samples throughout a bog  
1226 core (Jura Mountains, Switzerland). *Journal of Soils and Sediments* 9, 443-456 (2009).
- 1227 455 Xu, X. & Kazuyuki, I. Soil acidification stimulates the emission of ethylene from temperate  
1228 forest soils. *Advances in Atmospheric Sciences* 26, 1253-1261 (2009).
- 1229 456 Stutter, M. I., Langan, S. J. & Lumsdon, D. G. Vegetated buffer strips can lead to increased

- 1230 release of phosphorus to waters: a biogeochemical assessment of the mechanisms.  
 1231 Environmental science & technology 43, 1858-1863 (2009).
- 1232 457 Sleutel, S. et al. Patterns of dissolved organic carbon and nitrogen fluxes in deciduous and  
 1233 coniferous forests under historic high nitrogen deposition. Biogeosciences 6, 2743-2758 (2009).
- 1234 458 Roberts, P., Newsham, K. K., Bardgett, R. D., Farrar, J. F. & Jones, D. L. Vegetation cover  
 1235 regulates the quantity, quality and temporal dynamics of dissolved organic carbon and nitrogen  
 1236 in Antarctic soils. Polar Biology 32, 999-1008 (2009).
- 1237 459 Fujii, K., Funakawa, S., Hayakawa, C., Sukartiningih & Kosaki, T. Quantification of proton  
 1238 budgets in soils of cropland and adjacent forest in Thailand and Indonesia. Plant and Soil 316,  
 1239 241-255 (2009).
- 1240 460 Aanderud, Z. T. & Richards, J. H. Hydraulic redistribution may stimulate decomposition.  
 1241 Biogeochemistry 95, 323-333 (2009).
- 1242 461 Prokushkin, A., Tokareva, I., Prokushkin, S., Abaimov, A. & Guggenberger, H. Fluxes of  
 1243 dissolved organic matter in larch forests in the cryolithozone of central Siberia. Russian Journal  
 1244 of Ecology 39, 151-159 (2008).
- 1245 462 Menyailo, O. The effect of afforestation on mineralization of soil organic matter. Russian  
 1246 Journal of Ecology 39, 21-25 (2008).
- 1247 463 Fiedler, S. et al. Particulate organic carbon (POC) in relation to other pore water carbon  
 1248 fractions in drained and rewetted fens in Southern Germany. Biogeosciences 5, 1615-1623  
 1249 (2008).
- 1250 464 Fellman, J. B., D'Amore, D. V., Hood, E. & Boone, R. D. Fluorescence characteristics and  
 1251 biodegradability of dissolved organic matter in forest and wetland soils from coastal temperate  
 1252 watersheds in southeast Alaska. Biogeochemistry 88, 169-184 (2008).
- 1253 465 Åkerblom, S. et al. Partitioning of Hg between solid and dissolved organic matter in the humus  
 1254 layer of boreal forests. Water, air, and soil pollution 189, 239-252 (2008).
- 1255 466 Zambrosi, F. C. B., Alleoni, L. R. F. & Caires, E. F. Nutrient concentration in soil water extracts  
 1256 and soybean nutrition in response to lime and gypsum applications to an acid Oxisol under  
 1257 no-till system. Nutrient Cycling in Agroecosystems 79, 169-179 (2007).
- 1258 467 Zalamea, M., González, G., Ping, C.-L. & Michaelson, G. Soil organic matter dynamics under  
 1259 decaying wood in a subtropical wet forest: effect of tree species and decay stage. Plant and Soil  
 1260 296, 173-185 (2007).
- 1261 468 Wickland, K. P., Neff, J. C. & Aiken, G. R. Dissolved organic carbon in Alaskan boreal forest:  
 1262 Sources, chemical characteristics, and biodegradability. Ecosystems 10, 1323-1340 (2007).
- 1263 469 Ward, S. E., Bardgett, R. D., McNamara, N. P., Adamson, J. K. & Ostle, N. J. Long-term  
 1264 consequences of grazing and burning on northern peatland carbon dynamics. Ecosystems 10,  
 1265 1069-1083 (2007).
- 1266 470 Vink, S., Ford, P., Bormans, M., Kelly, C. & Turley, C. Contrasting nutrient exports from a  
 1267 forested and an agricultural catchment in south-eastern Australia. Biogeochemistry 84, 247-264  
 1268 (2007).
- 1269 471 Peichl, M. et al. Concentrations and fluxes of dissolved organic carbon in an age-sequence of  
 1270 white pine forests in Southern Ontario, Canada. Biogeochemistry 86, 1-17 (2007).
- 1271 472 Park, J.-H., Day, T. A., Strauss, S. & Ruhland, C. T. Biogeochemical pools and fluxes of carbon  
 1272 and nitrogen in a maritime tundra near penguin colonies along the Antarctic Peninsula. Polar  
 1273 Biology 30, 199-207 (2007).

- 1274 473 Pampura, T., Groenenberg, J., Lofts, S. & Pripulina, I. Validation of transfer functions predicting  
1275 Cd and Pb free metal ion activity in soil solution as a function of soil characteristics and reactive  
1276 metal content. *Water, air, and soil pollution* 184, 217-234 (2007).
- 1277 474 Ngao, J., Longdoz, B., Granier, A. & Epron, D. Estimation of autotrophic and heterotrophic  
1278 components of soil respiration by trenching is sensitive to corrections for root decomposition  
1279 and changes in soil water content. *Plant and soil* 301, 99-110 (2007).
- 1280 475 Montañón, N. M., García-Oliva, F. & Jaramillo, V. J. Dissolved organic carbon affects soil  
1281 microbial activity and nitrogen dynamics in a Mexican tropical deciduous forest. *Plant and Soil*  
1282 295, 265-277 (2007).
- 1283 476 McGee, G. G., Mitchell, M. J., Leopold, D. J. & Raynal, D. J. Comparison of soil nutrient fluxes  
1284 from tree-fall gap zones of an old-growth northern hardwood forest<sup>1</sup>. *The Journal of the Torrey*  
1285 *Botanical Society* 134, 269-280 (2007).
- 1286 477 Giesler, R. et al. Production of dissolved organic carbon and low-molecular weight organic acids  
1287 in soil solution driven by recent tree photosynthate. *Biogeochemistry* 84, 1-12 (2007).
- 1288 478 Vinther, F. P., Hansen, E. M. & Eriksen, J. Leaching of soil organic carbon and nitrogen in sandy  
1289 soils after cultivating grass-clover swards. *Biology and Fertility of Soils* 43, 12-19 (2006).
- 1290 479 Tao, S., Xu, F., Liu, W., Cui, Y. & Coveney, R. M. A chemical extraction method for mimicking  
1291 bioavailability of polycyclic aromatic hydrocarbons to wheat grown in soils containing various  
1292 amounts of organic matter. *Environmental science & technology* 40, 2219-2224 (2006).
- 1293 480 Marchand, C., Albéric, P., Lallier-Vergès, E. & Baltzer, F. Distribution and characteristics of  
1294 dissolved organic matter in mangrove sediment pore waters along the coastline of French  
1295 Guiana. *Biogeochemistry* 81, 59-75 (2006).
- 1296 481 Lee, R. Y. & Joye, S. B. Seasonal patterns of nitrogen fixation and denitrification in oceanic  
1297 mangrove habitats. *Marine Ecology Progress Series* 307, 127-141 (2006).
- 1298 482 Jones, D. L. & Willett, V. B. Experimental evaluation of methods to quantify dissolved organic  
1299 nitrogen (DON) and dissolved organic carbon (DOC) in soil. *Soil Biology and biochemistry* 38,  
1300 991-999 (2006).
- 1301 483 Frøberg, M., Berggren, D., Bergkvist, B., Bryant, C. & Mulder, J. Concentration and fluxes of  
1302 dissolved organic carbon (DOC) in three Norway spruce stands along a climatic gradient in  
1303 Sweden. *Biogeochemistry* 77, 1-23 (2006).
- 1304 484 Brenner, R. E., Boone, R. D., Jones, J. B., Lajtha, K. & Ruess, R. W. Successional and physical  
1305 controls on the retention of nitrogen in an undisturbed boreal forest ecosystem. *Oecologia* 148,  
1306 602-611 (2006).
- 1307 485 Asano, Y., Compton, J. E. & Church, M. R. Hydrologic flowpaths influence inorganic and  
1308 organic nutrient leaching in a forest soil. *Biogeochemistry* 81, 191-204 (2006).
- 1309 486 Aitkenhead-Peterson, J. A. et al. Linking foliar chemistry to forest floor solid and solution phase  
1310 organic C and N in *Picea abies* [L.] Karst stands in northern Bohemia. *Plant and soil* 283,  
1311 187-201 (2006).
- 1312 487 Weintraub, M. N. & Schimel, J. P. The seasonal dynamics of amino acids and other nutrients in  
1313 Alaskan Arctic tundra soils. *Biogeochemistry* 73, 359-380 (2005).
- 1314 488 Schwendenmann, L. & Veldkamp, E. The role of dissolved organic carbon, dissolved organic  
1315 nitrogen, and dissolved inorganic nitrogen in a tropical wet forest ecosystem. *Ecosystems* 8,  
1316 339-351 (2005).
- 1317 489 Schulze, W. X. et al. A proteomic fingerprint of dissolved organic carbon and of soil particles.

- 1318 Oecologia 142, 335-343 (2005).
- 1319 490 Opsahl, S. P. Organic carbon composition and oxygen metabolism across a gradient of  
1320 seasonally inundated limesink and riparian wetlands in the southeast Coastal Plain, USA.  
1321 Biogeochemistry 76, 47-68 (2005).
- 1322 491 Kaiser, K. & Guggenberger, G. Dissolved organic sulphur in soil water under *Pinus sylvestris* L.  
1323 and *Fagus sylvatica* L. stands in northeastern Bavaria, Germany variations with seasons and soil  
1324 depth. Biogeochemistry 72, 337-364 (2005).
- 1325 492 Fröberg, M., Kleja, D. B., Bergkvist, B., Tipping, E. & Mulder, J. Dissolved organic carbon  
1326 leaching from a coniferous forest floor--a field manipulation experiment. Biogeochemistry 75,  
1327 271-287 (2005).
- 1328 493 Fang, C. & Moncrieff, J. B. The variation of soil microbial respiration with depth in relation to  
1329 soil carbon composition. Plant and Soil 268, 243-253 (2005).
- 1330 494 Lu, Y., Watanabe, A. & Kimura, M. Contribution of plant photosynthates to dissolved organic  
1331 carbon in a flooded rice soil. Biogeochemistry 71, 1-15 (2004).
- 1332 495 Cory, R., Green, S. & Pregitzer, K. Dissolved organic matter concentration and composition in  
1333 the forests and streams of Olympic National Park, WA. Biogeochemistry 67, 269-288 (2004).
- 1334 496 Ciglasch, H., Lilienfein, J., Kaiser, K. & Wilcke, W. Dissolved organic matter under native  
1335 Cerrado and *Pinus caribaea* plantations in the Brazilian savanna. Biogeochemistry 67, 157-182  
1336 (2004).
- 1337 497 Bohlen, P. J., Pelletier, D. M., Groffman, P. M., Fahey, T. J. & Fisk, M. C. Influence of  
1338 earthworm invasion on redistribution and retention of soil carbon and nitrogen in northern  
1339 temperate forests. Ecosystems 7, 13-27 (2004).
- 1340 498 Lindroos, A.-J., Brügger, T., Derome, J. & Derome, K. The weathering of mineral soil by natural  
1341 soil solutions. Water, Air, and Soil Pollution 149, 269-279 (2003).
- 1342 499 Yu, Z. et al. Contribution of amino compounds to dissolved organic nitrogen in forest soils.  
1343 Biogeochemistry 61, 173-198 (2002).
- 1344 500 Ross, D. et al. Afforestation of pastures with *Pinus radiata* influences soil carbon and nitrogen  
1345 pools and mineralisation and microbial properties. Soil Research 40, 1303-1318 (2002).
- 1346 501 Qualls, R., Haines, B., Swank, W. & Tyler, S. Retention of soluble organic nutrients by a  
1347 forested ecosystem. Biogeochemistry 61, 135-171 (2002).
- 1348 502 Menyailo, O. V., Hungate, B. A. & Zech, W. Tree species mediated soil chemical changes in a  
1349 Siberian artificial afforestation experiment. Plant and Soil 242, 171-182 (2002).
- 1350 503 Jacinthe, P.-A., Dick, W. & Owens, L. Overwinter soil denitrification activity and mineral  
1351 nitrogen pools as affected by management practices. Biology and fertility of soils 36, 1-9  
1352 (2002).
- 1353 504 Solinger, S., Kalbitz, K. & Matzner, E. Controls on the dynamics of dissolved organic carbon  
1354 and nitrogen in a Central European deciduous forest. Biogeochemistry 55, 327-349 (2001).
- 1355 505 Ross, D. J., Scott, N. A., Tate, K. R., Rodda, N. J. & Townsend, J. A. Root effects on soil carbon  
1356 and nitrogen cycling in a *Pinus radiata* D. Don plantation on a coastal sand. Soil Research 39,  
1357 1027-1039 (2001).
- 1358 506 Fitzhugh, R. D. et al. Effects of soil freezing disturbance on soil solution nitrogen, phosphorus,  
1359 and carbon chemistry in a northern hardwood ecosystem. Biogeochemistry 56, 215-238 (2001).
- 1360 507 Zeller, V., Bahn, M., Aichner, M. & Tappeiner, U. Impact of land-use change on nitrogen  
1361 mineralization in subalpine grasslands in the Southern Alps. Biology and Fertility of Soils 31,

1362 441-448 (2000).

1363 508 McDowell, W. H. Internal nutrient fluxes in a Puerto Rican rain forest. *Journal of Tropical*  
1364 *Ecology* 14, 521-536 (1998).

1365 509 Johnson, C. E., Driscoll, C. T., Siccama, T. G. & Likens, G. E. Element fluxes and landscape  
1366 position in a northern hardwood forest watershed ecosystem. *Ecosystems* 3, 159-184 (2000).

1367 510 Markewitz, D. & Richter, D. D. The bio in aluminum and silicon geochemistry.  
1368 *Biogeochemistry* 42, 235-252 (1998).

1369 511 Zabowski, D., Rygielwicz, P. & Skinner, M. Site disturbance effects on a clay soil under radiata  
1370 pine: I. Soil solutions and clay mineral stability. *Plant and soil* 186, 343-351 (1996).

1371 512 Dai, K. O. H., David, M. B. & Vance, G. F. Characterization of solid and dissolved carbon in a  
1372 spruce-fir Spodosol. *Biogeochemistry* 35, 339-365 (1996).

1373 513 Schaaf, W. Effects of Mg (OH) 2-fertilization on nutrient cycling in a heavily damaged Norway  
1374 spruce ecosystem (NE Bavaria/FRG). *Plant and Soil* 168, 505-511 (1995).

1375 514 贾韦德. Impacts of Different Land Uses on Carbon Fluxes from Subtropical Soils in Central  
1376 China: Implications for Carbon Sequestration, 华中农业大学, (2009).

1377 515 Zhao, R., He, M., Jiang, C. & Liu, F. Soil microbial stoichiometry and community structure  
1378 responses to long-term natural forest conversion to plantations in a subtropical region.  
1379 *Environmental Science and Pollution Research* 29, 27560-27570 (2022).

1380 516 Zhang, L. et al. Alpine meadow degradation depresses soil nitrogen fixation by regulating plant  
1381 functional groups and diazotrophic community composition. *Plant and Soil*, 1-17 (2022).

1382 517 Yang, R. et al. The content, composition, and influencing factors of organic carbon in the  
1383 sediments of two types of constructed wetlands. *Environmental Science and Pollution Research*  
1384 28, 49206-49219 (2021).

1385 518 Yang, H., Xie, Y., Zhu, T. & Zhou, M. Reduced organic carbon content during the evolvement of  
1386 calcareous soils in karst region. *Forests* 12, 221 (2021).

1387 519 Xiao, Y., Huang, Z., Li, Y., Ling, Y. & Xiao, H. Dynamics variation of soil labile organic carbon  
1388 fractions in different wetland types of dongting lake under seasonal water level fluctuation.  
1389 *Sustainability* 13, 13836 (2021).

1390 520 Shannon, V., Vanguelova, E., Morison, J., Shaw, L. & Clark, J. The contribution of deadwood to  
1391 soil carbon dynamics in contrasting temperate forest ecosystems. *European Journal of Forest*  
1392 *Research* 141, 241-252 (2022).

1393 521 Na, M., Sun, X., Zhang, Y., Sun, Z. & Rousk, J. Higher stand densities can promote soil carbon  
1394 storage after conversion of temperate mixed natural forests to larch plantations. *European*  
1395 *Journal of Forest Research* 140, 373-386 (2021).

1396 522 Lynn, T. M. et al. Effect of land use on soil properties, microbial abundance and diversity of four  
1397 different crop lands in central Myanmar. *3 Biotech* 11, 154 (2021).

1398 523 Liu, T., Peng, D., Tan, Z., Guo, J. & Zhang, Y. Effects of stand density on soil respiration and  
1399 labile organic carbon in different aged *Larix principis-rupprechtii* plantations. *Ecological*  
1400 *Processes* 10, 1-15 (2021).

1401 524 Liu, M., Li, P., Liu, M., Wang, J. & Chang, Q. The trend of soil organic carbon fractions related  
1402 to the successions of different vegetation types on the tableland of the Loess Plateau of China.  
1403 *Journal of Soils and Sediments* 21, 203-214 (2021).

1404 525 Kurganova, I., Telesnina, V., Lopes de Gerenyu, V., Lichko, V. & Karavanova, E. The dynamics  
1405 of carbon pools and biological activity of retic albic podzols in southern taiga during the

1406 postagrogenic evolution. *Eurasian Soil Science* 54, 337-351 (2021).

1407 526 Fan, S. et al. Variations in soil enzyme activities and microbial communities along an altitudinal  
1408 gradient on the eastern Qinghai–Tibetan plateau. *Forests* 12, 681 (2021).

1409 527 Čapek, P., Kasanke, C. P., Starke, R., Zhao, Q. & Tahovská, K. Biochemical inhibition of acid  
1410 phosphatase activity in two mountain spruce forest soils. *Biology and Fertility of Soils* 57,  
1411 991-1005 (2021).

1412 528 Xiao, S. et al. Soil organic carbon sequestration and active carbon component changes following  
1413 different vegetation restoration ages on severely eroded red soils in subtropical China. *Forests*  
1414 11, 1304 (2020).

1415 529 Xu, Z. et al. Plant functional traits determine latitudinal variations in soil microbial function:  
1416 evidence from forests in China. *Biogeosciences* 16, 3333-3349 (2019).

1417 530 Hui-Juan, X. et al. Relative importance of urban and non-urban land-use types for potential  
1418 denitrification derived N<sub>2</sub>O: insights from a regional study. *Earth and Environmental Science*  
1419 *Transactions of the Royal Society of Edinburgh* 109, 453-460 (2018).

1420 531 Sokołowska, J., Józefowska, A., Woźnica, K. & Zaleski, T. Interrelationship between soil depth  
1421 and soil properties of Pieniny National Park forest (Poland). *Journal of Mountain Science* 16,  
1422 1534-1545 (2019).

1423 532 Gerzabek, M. H. et al. Agriculture changes soil properties on the Galápagos Islands—two case  
1424 studies. *Soil Research* 57, 201-214 (2019).

1425 533 Wei, H. et al. Variation in soil methane fluxes and comparison between two forests in China.  
1426 *Forests* 9, 204 (2018).

1427 534 Huo, L. et al. Effect of wetland reclamation on soil organic carbon stability in peat mire soil  
1428 around Xingkai Lake in Northeast China. *Chinese Geographical Science* 28, 325-336 (2018).

1429 535 Jiang, Q., Xu, Z., Hao, Y. & Dong, H. Dynamics of soil labile carbon and nitrogen pools in  
1430 riparian zone of Wyaralong Dam in Southeast Queensland, Australia. *Journal of Soils and*  
1431 *Sediments* 17, 1030-1044 (2017).

1432 536 Che, R. et al. Increase in ammonia-oxidizing microbe abundance during degradation of alpine  
1433 meadows may lead to greater soil nitrogen loss. *Biogeochemistry* 136, 341-352 (2017).

1434 537 Bonnett, S. A. F., Maltby, E. & Freeman, C. Hydrological legacy determines the type of enzyme  
1435 inhibition in a peatlands chronosequence. *Scientific Reports* 7, 9948 (2017).

1436 538 Song, H. et al. Changing roles of ammonia-oxidizing bacteria and archaea in a continuously  
1437 acidifying soil caused by over-fertilization with nitrogen. *Environmental Science and Pollution*  
1438 *Research* 23, 11964-11974 (2016).

1439 539 Gao, S.-J. et al. Spectroscopic characteristics of dissolved organic matter in afforestation forest  
1440 soil of Miyun District, Beijing. *Journal of analytical methods in chemistry* 2016, 1480857  
1441 (2016).

1442 540 Jia, G.-M., Zhang, B.-L., Niu, J.-T., Wang, L.-M. & Chen, F.-Q. Soil labile organic carbon  
1443 fractions in rhizosphere soil in citrus plantations in the Three Gorges Reservoir Area.  
1444 *Agroforestry systems* 89, 1097-1105 (2015).

1445 541 Cusack, D. F., Lee, J. K., McCleery, T. L. & LeCroy, C. S. Exotic grasses and nitrate enrichment  
1446 alter soil carbon cycling along an urban–rural tropical forest gradient. *Global change biology* 21,  
1447 4481-4496 (2015).

1448 542 Wang, Q., Xiao, F., Zhang, F. & Wang, S. Labile soil organic carbon and microbial activity in  
1449 three subtropical plantations. *Forestry* 86, 569-574 (2013).



- 1450 543 Almagro, M., Querejeta, J. I., Boix-Fayos, C. & Martínez-Mena, M. Links between vegetation  
1451 patterns, soil C and N pools and respiration rate under three different land uses in a dry  
1452 Mediterranean ecosystem. *Journal of Soils and Sediments* 13, 641-653 (2013).
- 1453 544 Song, Y. et al. Changes in labile organic carbon fractions and soil enzyme activities after  
1454 marshland reclamation and restoration in the Sanjiang Plain in Northeast China. *Environmental*  
1455 *management* 50, 418-426 (2012).
- 1456 545 Potthast, K., Hamer, U. & Makeschin, F. Land-use change in a tropical mountain rainforest  
1457 region of southern Ecuador affects soil microorganisms and nutrient cycling. *Biogeochemistry*  
1458 111, 151-167 (2012).
- 1459 546 Zhang, G. Changes of soil labile organic carbon in different land uses in Sanjiang Plain,  
1460 Heilongjiang Province. *Chinese Geographical Science* 20, 139-143 (2010).
- 1461 547 Schütz, K., Kandeler, E., Nagel, P., Scheu, S. & Ruesch, L. Functional microbial community  
1462 response to nutrient pulses by artificial groundwater recharge practice in surface soils and  
1463 subsoils. *FEMS microbiology ecology* 72, 445-455 (2010).
- 1464 548 Bárta, J., Melichová, T., Vaněk, D., Pícek, T. & Šantrůčková, H. Effect of pH and dissolved  
1465 organic matter on the abundance of nirK and nirS denitrifiers in spruce forest soil.  
1466 *Biogeochemistry* 101, 123-132 (2010).
- 1467 549 Montaño, N. M., Sandoval-Pérez, A. L., García-Oliva, F., Larsen, J. & Gavito, M. E. Microbial  
1468 activity in contrasting conditions of soil C and N availability in a tropical dry forest. *Journal of*  
1469 *tropical ecology* 25, 401-413 (2009).
- 1470 550 Zou, J. & Osborne, B. Spatially related sampling uncertainty in the assessment of labile soil  
1471 carbon and nitrogen in an Irish forest plantation. *Applied Sciences* 11, 2139 (2021).
- 1472 551 Zhang, X. et al. Soil profile rather than reclamation time drives the mudflat soil microbial  
1473 community in the wheat-maize rotation system of Nantong, China. *Journal of Soils and*  
1474 *Sediments* 21, 1672-1687 (2021).
- 1475 552 Zhang, W. et al. Soil water content, carbon, and nitrogen determine the abundances of  
1476 methanogens, methanotrophs, and methane emission in the Zoige alpine wetland. *Journal of*  
1477 *Soils and Sediments*, 1-12 (2022).
- 1478 553 Wan Mohd Zamri, W. M. I. et al. Assessment of Aqueous Extraction Methods on Extractable  
1479 Organic Matter and Hydrophobic/Hydrophilic Fractions of Virgin Forest Soils. *Molecules* 26,  
1480 2480 (2021).
- 1481 554 Yao, L. et al. Variations of soil organic matters and plant cuticular waxes along an altitude  
1482 gradient in Qinghai-Tibet Plateau. *Plant and Soil* 458, 41-58 (2021).
- 1483 555 Xu, J., Han, C., Jiang, Y. & Zhong, W. Spatial distribution and co-occurrence of aerobic  
1484 ammonia oxidation and anaerobic ammonium oxidation activities in the water-soil interface,  
1485 bulk, and rhizosphere regions of paddy soil. *Plant and Soil* 466, 557-568 (2021).
- 1486 556 Škerlep, M. et al. Spruce forest afforestation leading to increased Fe mobilization from soils.  
1487 *Biogeochemistry*, 1-18 (2022).
- 1488 557 Rupp, H., Tauchnitz, N. & Meissner, R. The effects of soil drying out and rewetting on nitrogen  
1489 and carbon leaching—results of a long-term lysimeter experiment. *Water* 13, 2601 (2021).
- 1490 558 Kupka, D., Kania, M. & Gruba, P. The proximity of a highway increases CO<sub>2</sub> respiration in  
1491 forest soil and decreases the stability of soil organic matter. *Scientific Reports* 11, 21605 (2021).
- 1492 559 Jeong, Y.-J. et al. Land use types with different fertilization management affected isotope ratios  
1493 of bulk and water-extractable C and N of soils in an intensive agricultural area. *Journal of Soils*

1494 and Sediments, 1-14 (2022).

1495 560 Freppaz, M. et al. Characterization of organic-rich mineral debris revealed by rapid glacier  
1496 retreat, Indren Glacier, European Alps. *Journal of Mountain Science* 18, 1521-1536 (2021).

1497 561 Farrell, M. & Prober, S. M. Keystone perennial grassland species control soil nitrogen flows.  
1498 *Ecosystems* 24, 1500-1515 (2021).

1499 562 Chibuike, G., Burkitt, L., Bretherton, M., Singh, R. & Bishop, P. Dissolved organic carbon  
1500 concentration and denitrification capacity of a New Zealand hill country soil after forage crop  
1501 establishment. *Earth Systems and Environment* 5, 419-432 (2021).

1502 563 Álvarez-López, V. et al. Evidence for nickel mobilisation in rhizosphere soils of Ni  
1503 hyperaccumulator *Odontarrhena serpyllifolia*. *Plant and Soil* 464, 89-107 (2021).

1504 564 Zhao, D. et al. Effects of contemporary land use types and conversions from wetland to paddy  
1505 field or dry land on soil organic carbon fractions. *Sustainability* 12, 2094 (2020).

1506 565 Wu, X. et al. Soil organic matter dynamics as affected by land use change from rice paddy to  
1507 wetland. *Wetlands* 40, 2199-2207 (2020).

1508 566 Wasak, K., Klimek, B. & Drewnik, M. Rapid effects of windfall on soil microbial activity and  
1509 substrate utilization patterns in the forest belt in the Tatra Mountains. *Journal of Soils and  
1510 Sediments* 20, 801-815 (2020).

1511 567 Maslov, M. N. & Maslova, O. A. Temperate peatlands use-management effects on seasonal  
1512 patterns of soil microbial activity and nitrogen availability. *Catena* 190, 104548 (2020).

1513 568 McMillan, R., Quideau, S., MacKenzie, M. & Biryukova, O. Nitrogen mineralization and  
1514 microbial activity in oil sands reclaimed boreal forest soils. *Journal of environmental quality* 36,  
1515 1470-1478 (2007).

1516 569 Sackett, T. E., Smith, S. M. & Basiliko, N. Indirect and direct effects of exotic earthworms on  
1517 soil nutrient and carbon pools in North American temperate forests. *Soil Biology and  
1518 Biochemistry* 57, 459-467 (2013).

1519 570 Zhang, L. et al. Infrared spectroscopy estimation methods for water-dissolved carbon and amino  
1520 sugars in diverse Canadian agricultural soils. *Canadian Journal of Soil Science* 98, 484-499  
1521 (2018).

1522 571 Moore, T. Dissolved organic carbon in a northern boreal landscape. *Global Biogeochemical  
1523 Cycles* 17 (2003).

1524 572 Lim, S.-S. et al. Soil organic carbon stocks in three Canadian agroforestry systems: From  
1525 surface organic to deeper mineral soils. *Forest ecology and management* 417, 103-109 (2018).

1526 573 Diochon, A., Gregorich, E. & Tarnocai, C. Evaluating the quantity and biodegradability of soil  
1527 organic matter in some Canadian Turbic Cryosols. *Geoderma* 202, 82-87 (2013).

1528 574 Oiffer, L. & Siciliano, S. D. Methyl mercury production and loss in Arctic soil. *Science of the  
1529 total environment* 407, 1691-1700 (2009).

1530 575 Löfgren, S. & Zetterberg, T. Decreased DOC concentrations in soil water in forested areas in  
1531 southern Sweden during 1987–2008. *Science of the Total Environment* 409, 1916-1926 (2011).

1532 576 Kerr, J. G. & Eimers, M. C. Decreasing soil water Ca<sup>2+</sup> reduces DOC adsorption in mineral  
1533 soils: Implications for long-term DOC trends in an upland forested catchment in southern  
1534 Ontario, Canada. *Science of the Total Environment* 427, 298-307 (2012).

1535 577 Ulanowski, T. & Branfireun, B. Small-scale variability in peatland pore-water biogeochemistry,  
1536 Hudson Bay Lowland, Canada. *Science of the Total Environment* 454, 211-218 (2013).

1537 578 Edwards, K. A. & Jefferies, R. L. Inter-annual and seasonal dynamics of soil microbial biomass

1538 and nutrients in wet and dry low-Arctic sedge meadows. *Soil Biology and Biochemistry* 57,  
1539 83-90 (2013).

1540 579 Xu, W. et al. Deepened snow enhances gross nitrogen cycling among Pan-Arctic tundra soils  
1541 during both winter and summer. *Soil Biology and Biochemistry* 160, 108356 (2021).

1542 580 Enanga, E., Creed, I., Casson, N. & Beall, F. Summer storms trigger soil N<sub>2</sub>O efflux episodes in  
1543 forested catchments. *Journal of Geophysical Research: Biogeosciences* 121, 95-108 (2016).

1544 581 Ota, M. et al. Could cryoturbic diapirs be key for understanding ecological feedbacks to climate  
1545 change in high arctic polar deserts? *Journal of Geophysical Research: Biogeosciences* 125,  
1546 e2019JG005263 (2020).

1547 582 Vogt, J., Wu, J., Altdorff, D., Le, T. B. & Gong, Y. Nitrous oxide fluxes of a boreal abandoned  
1548 pasture do not significantly differ from an adjacent natural bog despite distinct environmental  
1549 conditions. *Science of The Total Environment* 714, 136648 (2020).

1550 583 Dinsmore, K. J., Skiba, U. M., Billett, M. F., Rees, R. M. & Drewer, J. Spatial and temporal  
1551 variability in CH<sub>4</sub> and N<sub>2</sub>O fluxes from a Scottish ombrotrophic peatland: Implications for  
1552 modelling and up-scaling. *Soil Biology and Biochemistry* 41, 1315-1323 (2009).

1553 584 Van Eynde, E. et al. Soil zinc fertilisation does not increase maize yields but improves  
1554 nutritional quality. (2022).

1555 585 Chaplot, V. & Cooper, M. Soil aggregate stability to predict organic carbon outputs from soils.  
1556 *Geoderma* 243, 205-213 (2015).

1557 586 Yang, N., Zou, D., Yang, M. & Lin, Z. Variations in soil microbial biomass carbon and soil  
1558 dissolved organic carbon in the re-vegetation of hilly slopes with purple soil. *PLoS One* 11,  
1559 e0166536 (2016).

1560 587 Shao, X., Yang, W. & Wu, M. Seasonal dynamics of soil labile organic carbon and enzyme  
1561 activities in relation to vegetation types in Hangzhou Bay tidal flat wetland. *PLoS One* 10,  
1562 e0142677 (2015).

1563 588 Fujii, K., Hartono, A., Funakawa, S., Uemura, M. & Kosaki, T. Fluxes of dissolved organic  
1564 carbon in three tropical secondary forests developed on serpentine and mudstone. *Geoderma*  
1565 163, 119-126 (2011).

1566 589 Saunders, T. J., McClain, M. E. & Llerena, C. A. The biogeochemistry of dissolved nitrogen,  
1567 phosphorus, and organic carbon along terrestrial-aquatic flowpaths of a montane headwater  
1568 catchment in the Peruvian Amazon. *Hydrological Processes: An International Journal* 20,  
1569 2549-2562 (2006).

1570 590 Wu, H. et al. Modeling dissolved organic carbon in temperate forest soils: TRIPLEX-DOC  
1571 model development and validation. *Geoscientific Model Development* 7, 867-881 (2014).

1572 591 Mchunu, C. & Chaplot, V. Land degradation impact on soil carbon losses through water erosion  
1573 and CO<sub>2</sub> emissions. *Geoderma* 177, 72-79 (2012).

1574 592 Wolka, K., Biazin, B., Martinsen, V. & Mulder, J. Soil organic carbon and associated soil  
1575 properties in Enset (*Ensete ventricosum* Welw. Cheesman)-based homegardens in Ethiopia. *Soil  
1576 and Tillage Research* 205, 104791 (2021).

1577 593 Martinez-Mena, M., Lopez, J., Almagro, M., Boix-Fayos, C. & Albaladejo, J. Effect of water  
1578 erosion and cultivation on the soil carbon stock in a semiarid area of South-East Spain. *Soil and  
1579 Tillage Research* 99, 119-129 (2008).

1580 594 Qiu, S. et al. Changes in soil carbon and nitrogen pools after shifting from conventional cereal  
1581 to greenhouse vegetable production. *Soil and Tillage Research* 107, 80-87 (2010).

- 1582 595 Rizinjirabake, F., Tenenbaum, D. E. & Pilesjö, P. Sources of soil dissolved organic carbon in a  
1583 mixed agricultural and forested watershed in Rwanda. *Catena* 181, 104085 (2019).
- 1584 596 Cacace, C. et al. Effects of different pioneer and exotic species on the changes of degraded soils.  
1585 *Scientific Reports* 12, 18548 (2022).
- 1586 597 Xu, X., Miao, H. & Chen, Z. The vertical distribution and their relationship of dissolved organic  
1587 carbon and exchangeable metals in Chinese old-growth forest soils. *African Journal of*  
1588 *Agricultural Research* 6, 998-1008 (2011).
- 1589 598 Brucker, E., Kernchen, S. & Spohn, M. Release of phosphorus and silicon from minerals by soil  
1590 microorganisms depends on the availability of organic carbon. *Soil Biology and Biochemistry*  
1591 143, 107737 (2020).
- 1592 599 Ciganda, V. S. et al. Soil nitrous oxide emissions from grassland: Potential inhibitor effect of  
1593 hippuric acid. *Journal of Plant Nutrition and Soil Science* 182, 40-47 (2019).
- 1594 600 Ge, P., Da, L., Wang, W. & Xu, X. Seasonal dynamics of dissolved organic carbon, nitrogen and  
1595 other nutrients in soil of *Pinus massoniana* stands after pine wilt disease disturbance. *Journal of*  
1596 *soil science and plant nutrition* 14, 75-87 (2014).
- 1597 601 Undurraga, P., Zagal, E., Sepúlveda, G. & Valderrama, N. Dissolved organic carbon and  
1598 nitrogen in Andisol for six crop rotations with different soil management intensity. *Chilean*  
1599 *Journal of Agricultural Research* 69, 445-454 (2009).
- 1600 602 Gangloff, S., Stille, P., Pierret, M.-C., Weber, T. & Chabaux, F. Characterization and evolution  
1601 of dissolved organic matter in acidic forest soil and its impact on the mobility of major and trace  
1602 elements (case of the Strengbach watershed). *Geochimica et Cosmochimica Acta* 130, 21-41  
1603 (2014).
- 1604 603 Oporto, C., Vandecasteele, C. & Smolders, E. Elevated cadmium concentrations in potato tubers  
1605 due to irrigation with river water contaminated by mining in Potosí Bolivia. *Journal of*  
1606 *environmental quality* 36, 1181-1186 (2007).
- 1607 604 Couic, E. et al. The impact of ecological restoration on biogeochemical cycling and mercury  
1608 mobilization in anoxic conditions on former mining sites in French Guiana. *Microorganisms* 9,  
1609 1702 (2021).
- 1610 605 Parsapour, M. K., Kooch, Y., Hosseini, S. M. & Alavi, S. J. Litter and topsoil in *Alnus*  
1611 *subcordata* plantation on former degraded natural forest land: a synthesis of age-sequence. *Soil*  
1612 *and Tillage Research* 179, 1-10 (2018).
- 1613 606 Dittman, J. A., Driscoll, C. T., Groffman, P. M. & Fahey, T. J. Dynamics of nitrogen and  
1614 dissolved organic carbon at the Hubbard Brook Experimental Forest. *Ecology* 88, 1153-1166  
1615 (2007).
- 1616 607 Rhoades, C. C. Soil Nitrogen Leaching in Logged Beetle-Killed Forests and Implications for  
1617 Riparian Fuel Reduction. *Journal of Environmental Quality* 48, 305-313 (2019).
- 1618 608 Rinklebe, J., Shaheen, S. M. & Yu, K. Release of As, Ba, Cd, Cu, Pb, and Sr under pre-definite  
1619 redox conditions in different rice paddy soils originating from the USA and Asia. *Geoderma* 270,  
1620 21-32 (2016).
- 1621 609 Schwaner, G. W. & Kelly, C. N. American chestnut soil carbon and nitrogen dynamics:  
1622 Implications for ecosystem response following restoration. *Pedobiologia* 75, 24-33 (2019).
- 1623 610 Patel, K. F. et al. Soil carbon and nitrogen responses to snow removal and concrete frost in a  
1624 northern coniferous forest. *Canadian Journal of Soil Science* 98, 436-447 (2018).
- 1625 611 Norton, U. et al. Moisture pulses, trace gas emissions and soil C and N in cheatgrass and native

1626 grass-dominated sagebrush-steppe in Wyoming, USA. *Soil Biology and Biochemistry* 40,  
1627 1421-1431 (2008).

1628 612 Löfgren, S., Gustafsson, J. P. & Bringmark, L. Decreasing DOC trends in soil solution along the  
1629 hillslopes at two IM sites in southern Sweden—Geochemical modeling of organic matter  
1630 solubility during acidification recovery. *Science of the Total Environment* 409, 201-210 (2010).

1631 613 Burns, K. N. et al. Vineyard soil bacterial diversity and composition revealed by 16S rRNA  
1632 genes: differentiation by geographic features. *Soil Biology and Biochemistry* 91, 232-247  
1633 (2015).

1634 614 Weintraub, M. N., Scott-Denton, L. E., Schmidt, S. K. & Monson, R. K. The effects of tree  
1635 rhizodeposition on soil exoenzyme activity, dissolved organic carbon, and nutrient availability in  
1636 a subalpine forest ecosystem. *Oecologia* 154, 327-338 (2007).

1637 615 Chambers, L. G. et al. Biogeochemical effects of simulated sea level rise on carbon loss in an  
1638 Everglades mangrove peat soil. *Hydrobiologia* 726, 195-211 (2014).

1639 616 Pschenykyj, C. M., Clark, J. M., Shaw, L. J., Griffiths, R. I. & Evans, C. D. Effects of acidity  
1640 on dissolved organic carbon in organic soil extracts, pore water and surface litters. *Science of  
1641 the Total Environment* 703, 135585 (2020).

1642 617 Spears, J. D., Holub, S., Harmon, M. & Lajtha, K. The influence of decomposing logs on soil  
1643 biology and nutrient cycling in an old-growth mixed coniferous forest in Oregon, USA.  
1644 *Canadian Journal of Forest Research* 33, 2193-2201 (2003).

1645 618 Zheng, J. et al. A long-term hybrid poplar plantation on cropland reduces soil organic carbon  
1646 mineralization and shifts microbial community abundance and composition. *Applied Soil  
1647 Ecology* 111, 94-104 (2017).

1648 619 Zhao, M., Wang, M., Zhao, Y., Jiang, M. & Wang, G. Variations in concentration and carbon  
1649 isotope composition of methanotroph biomarkers in sedge peatlands along the altitude gradient  
1650 in the Changbai Mountain, China. *Frontiers in Microbiology* 13, 892430 (2022).

1651 620 Wardinski, K. M. et al. Water-soluble organic matter from soils at the terrestrial-Aquatic  
1652 interface in Wetland-dominated landscapes. *Journal of Geophysical Research: Biogeosciences*  
1653 127, e2022JG006994 (2022).

1654 621 Wang, H., Wu, J., Li, G., Yan, L. & Wei, X. Effects of rainfall frequency on soil labile carbon  
1655 fractions in a wet meadow on the Qinghai-Tibet Plateau. *Journal of Soils and Sediments* 22,  
1656 1489-1499 (2022).

1657 622 Morgalev, S. Y. et al. Fractionation of organic C, nutrients, metals and bacteria in peat porewater  
1658 and ice after freezing and thawing. *Environmental Science and Pollution Research* 30, 823-836  
1659 (2023).

1660 623 Pintaldi, E. et al. Snowbed communities and soil C and N dynamics during a four-year  
1661 investigation in the NW-Italian Alps. *Arctic, Antarctic, and Alpine Research* 54, 368-385 (2022).

1662 624 Du, W., Wang, D., Wu, X., Zhao, L. & Zang, S. Effects of Forest Types on SOC and DOC in the  
1663 Permafrost Region of the Daxing'anling Mountains. *Processes* 10, 1293 (2022).

1664 625 Zhang, F. et al. Analysis of UV–VIS spectral characteristics and content estimation of soil DOM  
1665 under mulching practices. *Ecological Indicators* 138, 108869 (2022).

1666 626 Yang, Y. et al. Variations in the composition of tea leaves and soil microbial community. *Biology  
1667 and Fertility of Soils* 58, 167-179 (2022).

1668 627 Zhang, R. et al. Changes in the characteristics of soil dissolved organic matter over time since  
1669 inter-planting with white clover (*Trifolium repens* L.) in apple orchards on the Loess Plateau in

1670 China. *Plant and Soil*, 1-18 (2022).

1671 628 Darusman, T., Murdiyarsa, D., Impran, I., Chaniago, I. A. & Lestari, D. P. Carbon dynamics in  
1672 rewetted tropical peat swamp forests. *Climate* 10, 35 (2022).

1673 629 Aaltonen, H. et al. The effects of glucose addition and water table manipulation on peat quality  
1674 of drained peatland forests with different management practices. *Soil Science Society of  
1675 America Journal* 86, 1625-1638 (2022).

1676 630 Xiang, F. et al. Black soldier fly larvae vermicompost alters soil biochemistry and bacterial  
1677 community composition. *Applied Microbiology and Biotechnology* 106, 4315-4328 (2022).

1678 631 Garc ía, P. E., Mansilla Ferro, C. F. & Di éguéz, M. C. Characterisation of dissolved organic  
1679 matter from temperate wetlands: field dynamics and photoreactivity changes driven by natural  
1680 inputs and diagenesis along the hydroperiod. *New Zealand Journal of Marine and Freshwater  
1681 Research* 57, 480-494 (2023).

1682 632 Xiong, X. et al. Carbon and nitrogen availability drives seasonal variation in soil microbial  
1683 communities along an elevation gradient. *Forests* 13, 1657 (2022).

1684 633 Xu, W., Elberling, B. & Ambus, P. L. Pyrogenic organic matter as a nitrogen source to microbes  
1685 and plants following fire in an Arctic heath tundra. *Soil Biology and Biochemistry* 170, 108699  
1686 (2022).

1687 634 Li, X. et al. Switchgrass cropping systems affect soil carbon and nitrogen and microbial  
1688 diversity and activity on marginal lands. *GCB Bioenergy* 14(8), 918–940 (2022).

1689 635 Gong, S. et al. Effect of stand age on the temporal dynamics of soil active carbon and nitrogen  
1690 in Chinese cypress artificial forests. *Soil Science and Plant Nutrition* 68, 64-71 (2022).

1691 636 Prijac, A., Gandois, L., Jeanneau, L., Taillardat, P. & Garneau, M. Dissolved organic matter  
1692 concentration and composition discontinuity at the peat–pool interface in a boreal peatland.  
1693 *Biogeosciences* 19, 4571-4588 (2022).

1694 637 Moens, C., Dondeyne, S., Panagea, I. & Smolders, E. Depth profile of colloidal iron in the pore  
1695 water of an Albic Podzol. *European Journal of Soil Science* 73, e13305 (2022).

1696 638 Friedl, J. et al. Amplitude and frequency of wetting and drying cycles drive N<sub>2</sub> and N<sub>2</sub>O  
1697 emissions from a subtropical pasture. *Biology and Fertility of Soils* 58, 593-605 (2022).

1698 639 Huang, W.-H., Lin, T.-C., Huang, C.-M., Chen, T.-C. & Yeh, Y.-L. Copper distribution and  
1699 binding affinity of size-fractionated humic substances taken from paddy soil and correlation with  
1700 optical characteristics. *Agronomy* 12, 1689 (2022).

1701 640 Rindt, O. et al. Biogeochemical dynamics during snowmelt and in summer in the Alps.  
1702 *Biogeochemistry* 162, 257-266 (2023).

1703 641 Zhao, R., He, M. & Liu, F. Differential linkages between soil respiration components and  
1704 microbial community structures under long-term forest conversion. *Journal of Soils and  
1705 Sediments* 22, 1252-1262 (2022).

1706 642 Li, H., Yang, Y., Crabbe, M. J. C. & Chen, H. The Characteristics of Dissolved Organic Matter  
1707 and Soil Microbial Communities in the Soils of *Larix principis-rupprechtii* Mayr. Plantations in  
1708 the Qinling Mountains, China. *Sustainability* 14, 11968 (2022).

1709 643 Leogrande, R. et al. Reclaimed water use in agriculture: effects on soil chemical and biological  
1710 properties in a long-term irrigated citrus farm. *Agronomy* 12, 1317 (2022).

1711 644 Behnke, M., Fellman, J. B., D'Amore, D. V., Gomez, S. & Spencer, R. From canopy to  
1712 consumer: what makes and modifies terrestrial DOM in a temperate forest. *Biogeochemistry*  
1713 164, 185-205 (2023).

- 1714 645 Ricardo, S.-M. et al. Exploring dissolved organic carbon variations in a high elevation tropical  
1715 peatland ecosystem: Cerro de la Muerte, Costa Rica. *Frontiers in Water* 3, 742780 (2022).
- 1716 646 Eder, A. et al. Pathways and composition of dissolved organic carbon in a small agricultural  
1717 catchment during base flow conditions. *Ecohydrology & Hydrobiology* 22, 96-112 (2022).
- 1718 647 McFarland, J. W. et al. Mechanisms for retention of low molecular weight organic carbon varies  
1719 with soil depth at a coastal prairie ecosystem. *Soil Biology and Biochemistry* 168, 108601  
1720 (2022).
- 1721 648 Sokołowska, J., Józefowska, A. & Zaleski, T. Impact of natural forest succession on changes in  
1722 soil organic carbon in the polish Carpathian mountains. *Forests* 13, 744 (2022).
- 1723 649 Zhang, L. et al. Composition characteristics of dissolved organic matter at the vegetation-soil  
1724 interface under the influence of mining disturbances. *Polish Journal of Environmental Studies*  
1725 31, 439-449 (2021).
- 1726 650 de Aguiar Santiago, F. L. et al. Rehabilitation promotes rapid recovery of arbuscular mycorrhizal  
1727 fungi in iron mining areas. *Pedobiologia* 95, 150838 (2022).
- 1728 651 Guan, J. et al. Responses of soil active organic carbon fractions and enzyme activities to  
1729 freeze-thaw cycles in Wetlands. *Wetlands* 42, 36 (2022).
- 1730 652 Yates, C. A. et al. Determining patterns in the composition of dissolved organic matter in fresh  
1731 waters according to land use and management. *Biogeochemistry* 164, 143-162 (2023).
- 1732 653 Kaneko, S., Furusawa, H., Okamoto, T. & Hirano, Y. Dissolved Organic Matter (DOM) in a  
1733 Warm-Temperate Forested Watershed—A Possibility of Ultraviolet Absorbance as an Indicator  
1734 of DOM. *Forests* 13, 510 (2022).
- 1735 654 Fan, Q., Yang, Y., Geng, Y., Wu, Y. & Niu, Z. Biochemical composition and function of  
1736 subalpine shrubland and meadow soil microbiomes in the Qilian Mountains, Qinghai–Tibetan  
1737 plateau, China. *PeerJ* 10, e13188 (2022).
- 1738 655 Cui, J. et al. Correlations between dominant vegetation type and composition and diversity of  
1739 soil bacterial communities in a subtropical forest. *Soil Science Society of America Journal* 86,  
1740 1123-1137 (2022).
- 1741 656 Zhang, H., Zheng, X., Cai, Y. & Chang, S. X. Land-use change enhanced soc mineralization but  
1742 did not significantly affect its storage in the surface layer. *International Journal of*  
1743 *Environmental Research and Public Health* 19, 3020 (2022).
- 1744 657 Startsev, V. V., Yakovleva, E. V., Kutjavin, I. N. & Dymov, A. A. Fire impact on carbon pools  
1745 and basic properties of retisols in native spruce forests of the European North and Central  
1746 Siberia of Russia. *Forests* 13, 1135 (2022).
- 1747 658 Kobierski, M. & Banach-Szott, M. Organic matter in riverbank sediments and fluvisols from the  
1748 flood zones of lower vistula river. *Agronomy* 12, 536 (2022).
- 1749 659 Cui, Q. et al. Response of soil carbon fractions and enzyme activities to mowing management  
1750 on in a coastal wetland of the yellow river delta. *Frontiers in Marine Science* 9, 993181 (2022).
- 1751 660 Davis, C. J., Presley, D. R., Rivard, C. L., Griffin, J. J. & Tomlinson, P. J. Conservation systems  
1752 influence on soil properties in pumpkin production. *Soil Science Society of America Journal* 86,  
1753 435-449 (2022).
- 1754 661 Długosz, J. & Piotrowska-Długosz, A. Changes in carbon-degrading enzyme activities and  
1755 microbial biomass content—The effect of soil depth and soil-forming processes. *Applied Soil*  
1756 *Ecology* 180, 104629 (2022).
- 1757 662 Fujii, K., Funakawa, S. & Kosaki, T. Effects of forest management on soil acidification in cedar

- 1758 plantation. *Geoderma* 424, 115967 (2022).
- 1759 663 Glina, B. et al. Local weather conditions determine DOC production and losses from  
1760 agricultural fen soils affected by open-pit lignite mining. *Catena* 211, 106012 (2022).
- 1761 664 He, G. et al. Forest succession improves the complexity of soil microbial interaction and  
1762 ecological stochasticity of community assembly: Evidence from *Phoebe bournei*-dominated  
1763 forests in subtropical regions. *Frontiers in Microbiology* 13, 1021258 (2022).
- 1764 665 He, Y. et al. Drivers of soil respiration and nitrogen mineralization change after litter  
1765 management at a subtropical Chinese sweetgum tree plantation. *Soil Use and Management* 39,  
1766 92-103 (2023).
- 1767 666 Hu, L., Li, Q., Yan, J., Liu, C. & Zhong, J. Vegetation restoration facilitates belowground  
1768 microbial network complexity and recalcitrant soil organic carbon storage in southwest China  
1769 karst region. *Science of the Total Environment* 820, 153137 (2022).
- 1770 667 Kaba, M., Mesnage, V., Sakho, I., Faye, S. & Boussafir, M. Processes controlling the organic  
1771 matter degradation in a tropical coastal wetland: Mboro, Senegal. *Catena* 217, 106419 (2022).
- 1772 668 Kooch, Y., Ghorbanzadeh, N., Kuzyakov, Y., Praeg, N. & Ghaderi, E. Investigation of the effects  
1773 of the conversion of forests and rangeland to cropland on fertility and soil functions in  
1774 mountainous semi-arid landscape. *Catena* 210, 105951 (2022).
- 1775 669 Li, C. et al. Soil dissolved carbon and nitrogen dynamics along a revegetation chronosequence  
1776 of *Caragana korshinskii* plantations in the Loess hilly region of China. *Catena* 216, 106405  
1777 (2022).
- 1778 670 Li, J. et al. Characteristics of soil carbon emissions and bacterial community composition in  
1779 peatlands at different stages of vegetation succession. *Science of the Total Environment* 839,  
1780 156242 (2022).
- 1781 671 Li, J., Sun, X., Li, M., Zou, J. & Bian, H. Effects of stand age and soil organic matter quality on  
1782 soil bacterial and fungal community composition in *Larix gmelinii* plantations, Northeast China.  
1783 *Land Degradation & Development* 33, 1249-1259 (2022).
- 1784 672 Li, Y., Chen, J., Feng, H. & Siddique, K. H. Plastic mulching significantly improves soil enzyme  
1785 and microbial activities without mitigating gaseous N emissions in winter wheat-summer maize  
1786 rotations. *Field Crops Research* 286, 108630 (2022).
- 1787 673 Liang, K. et al. Changes in quantity and quality of dissolved organic carbon in purple soil: Roles  
1788 of land use and soil depth. *Land Degradation & Development* 34, 327-337 (2023).
- 1789 674 Liu, S. et al. Seasonal freeze-thaw characteristics of soil carbon pools under different vegetation  
1790 restoration types on the Longzhong Loess Plateau. *Frontiers in Ecology and Evolution* 10,  
1791 1019627 (2022).
- 1792 675 Liu, X. et al. Spatial distribution of soil iron across different plant communities along a  
1793 hydrological gradient in the Yellow River Estuary wetland. *Frontiers in Ecology and Evolution*  
1794 10, 979194 (2022).
- 1795 676 Liu, Y. et al. Changes in soil microbial metabolic activity following long-term forest succession  
1796 on the central Loess Plateau, China. *Land Degradation & Development* 34, 723-735 (2023).
- 1797 677 Mohseni, N. & Hosseinzadeh, S. R. Soil erosion progression under rill and gully erosion  
1798 processes and its effect on variations of mechanisms controlling C mineralization ratio.  
1799 *Ecohydrology & Hydrobiology* 22, 370-378 (2022).
- 1800 678 Nasonova, A., Levy, G. J., Rinot, O., Eshel, G. & Borisover, M. Organic matter in aqueous soil  
1801 extracts: Prediction of compositional attributes from bulk soil mid-IR spectra using partial least



1802 square regressions. *Geoderma* 411, 115678 (2022).

1803 679 Ren, B. et al. Appraisal of different land use systems for heterotrophic respiration in a Karst  
1804 landscape. *Environmental Research* 212, 113480 (2022).

1805 680 Wang, C., Xue, L. & Jiao, R. Stoichiometric imbalances and the dynamics of phosphatase  
1806 activity and the abundance of *phoC* and *phoD* genes with the development of *Cunninghamia*  
1807 *lanceolata* (Lamb.) Hook plantations. *Applied Soil Ecology* 173, 104373 (2022).

1808 681 Lei, B., Xu, Y., Tang, Y. & Hauptfleisch, K. Shifts in carbon stocks through soil profiles  
1809 following management change in intensive agricultural systems. *Agricultural Sciences* 6,  
1810 304-314 (2015).

1811 682 Liu, H. et al. Effects of the interaction between temperature and revegetation on the microbial  
1812 degradation of soil dissolved organic matter (DOM)—A DOM incubation experiment. *Geoderma*  
1813 337, 812-824 (2019).

1814 683 Wen-jun, Z. et al. Characteristics and influencing factors of soil dissolved organic carbon and  
1815 nitrogen in a tropical seasonal rainforest in Xishuangbanna, Southwest China. *Journal of Beijing*  
1816 *Forestry University* 38, 34-41 (2016).

1817 684 Yu-Lai, W., Chang-Ming, Y., Li-Min, Z. & Heng-Zhao, C. Spatial distribution and fluorescence  
1818 properties of soil dissolved organic carbon across a riparian buffer wetland in Chongming Island,  
1819 China. *Pedosphere* 25, 220-229 (2015).

1820 685 Liu, S. et al. The role of UV-B radiation and precipitation on straw decomposition and topsoil C  
1821 turnover. *Soil Biology and Biochemistry* 77, 197-202 (2014).

1822 686 Yao, S., Qin, J., Peng, X. & Zhang, B. The effects of vegetation on restoration of physical  
1823 stability of a severely degraded soil in China. *Ecological Engineering* 35, 723-734 (2009).

1824 687 Qiu, Q. et al. Effects of plant-derived dissolved organic matter (DOM) on soil CO<sub>2</sub> and N<sub>2</sub>O  
1825 emissions and soil carbon and nitrogen sequestrations. *Applied Soil Ecology* 96, 122-130  
1826 (2015).

1827 688 Long, G.-Q., Jiang, Y.-J. & Sun, B. Seasonal and inter-annual variation of leaching of dissolved  
1828 organic carbon and nitrogen under long-term manure application in an acidic clay soil in  
1829 subtropical China. *Soil and Tillage Research* 146, 270-278 (2015).

1830 689 Liu, T., Liu, C., Zhang, W. & Tu, C. Concentrations and migration features of dissolved organic  
1831 carbon in the soils of slope lands in Karst area. *China Environmental Science* 29, 248-253  
1832 (2009).

1833 690 Zhang, J., Song, C. & Yang, W. Seasonal dynamics of dissolved organic carbon and its impact  
1834 factors in the *Doyeuxia augustifolia* marsh soil. *Acta Scientiae Circumstantiae* 25, 1397-1402  
1835 (2005).

1836 691 Xiao, Y., Huang, Z., Wu, H. & Lv, X. Compositions and contents of active organic carbon in  
1837 different wetland soils in Sanjiang Plain, Northeast China. *Acta Ecol Sin* 23, 7625-7633 (2015).

1838 692 WANG, W., YANG, Y.-s., CHEN, G.-s., GUO, J.-f. & QIAN, W. Profile distribution and  
1839 seasonal variation of soil dissolved organic carbon in natural *Castanopsis fabric* forest in  
1840 subtropical China. *Chinese Journal of Ecology* 27, 924 (2008).

1841 693 Shu-fen, L., Yuan-chun, Y. & Sheng, H. Correlation between dissolved organic carbon and soil  
1842 factors of the forest soil in southern of China. *浙江农林大学学报* 20, 119-123 (2003).

1843 694 Lei, B., Fan, M., Chen, Q., Six, J. & Zhang, F. Conversion of wheat–maize to vegetable  
1844 cropping systems changes soil organic matter characteristics. *Soil Science Society of America*  
1845 *Journal* 74, 1320-1326 (2010).

- 1846 695 Lu, S. et al. Patterns and drivers of soil respiration and vegetation at different altitudes in  
1847 Southern China. *Applied Ecology & Environmental Research* 17 (2019).
- 1848 696 Lin, C., Larsen, E., Grace, P. & Smith, J. in *Soil solutions for a changing world: Proceedings of*  
1849 *the 19th World Congress of Soil Science.* 27-30 (International Union of Soil Sciences).
- 1850 697 Cookson, W. et al. Controls on soil nitrogen cycling and microbial community composition  
1851 across land use and incubation temperature. *Soil Biology and Biochemistry* 39, 744-756 (2007).
- 1852 698 Mavi, M. S. Evaluation of extractants to quantify dissolved organic carbon and nitrogen in  
1853 dissimilar soils. *Journal of the Indian Society of Soil Science* 66, 111-115 (2018).
- 1854 699 Kaiser, C. et al. Belowground carbon allocation by trees drives seasonal patterns of extracellular  
1855 enzyme activities by altering microbial community composition in a beech forest soil. *New*  
1856 *Phytologist* 187, 843-858 (2010).
- 1857 700 Vandenberghe, J., De Neve, S., Qualls, R. G., Sleutel, S. & Hofman, G. Comparison of  
1858 different isotherm models for dissolved organic carbon (DOC) and nitrogen (DON) sorption to  
1859 mineral soil. *Geoderma* 139, 144-153 (2007).
- 1860 701 Filep, T., Kincses, I. & Nagy, P. Dissolved organic carbon (DOC) and dissolved organic nitrogen  
1861 (DON) content of an arenosol as affected by liming in a pot experiment. *Archives of Agronomy*  
1862 *and Soil Science* 49, 111-117 (2003).
- 1863 702 Novara, A. et al. Dynamics of soil organic carbon pools after agricultural abandonment.  
1864 *Geoderma* 235, 191-198 (2014).
- 1865 703 Jaszczyński, J. The relationship between dissolved organic carbon and hydro-climatic factors in  
1866 peat-muck soil. *Journal of Water and Land Development* (2015).
- 1867 704 Cox, L. et al. Effect of exogenous carbon on movement of simazine and 2, 4-D in soils. *Soil*  
1868 *science society of America journal* 65, 1688-1695 (2001).
- 1869 705 Maxin, C. R. & Kögel-Knabner, I. Partitioning of polycyclic aromatic hydrocarbons (PAH) to  
1870 water-soluble soil organic matter. *European Journal of Soil Science* 46, 193-204 (1995).
- 1871 706 Matschonat, G. & Vogt, R. Assessment of a laboratory method to obtain the equilibrium solution  
1872 composition of forest soils. *European journal of soil science* 48, 545-552 (1997).
- 1873 707 Ludwig, B., Khanna, P. & Prenzel, J. Use of a coupled equilibrium model to describe the  
1874 buffering of protons and hydroxyl ions in some acid soils. *Zeitschrift für Pflanzenernährung und*  
1875 *Bodenkunde* 161, 547-554 (1998).
- 1876 708 Austnes, K. & Vestgarden, L. S. Prolonged frost increases release of C and N from a montane  
1877 heathland soil in southern Norway. *Soil Biology and Biochemistry* 40, 2540-2546 (2008).
- 1878 709 Sowerby, A., Emmett, B., Williams, D., Beier, C. & Evans, C. The response of dissolved organic  
1879 carbon (DOC) and the ecosystem carbon balance to experimental drought in a temperate  
1880 shrubland. *European Journal of Soil Science* 61, 697-709 (2010).
- 1881 710 Hughes, S., Reynolds, B. & Roberts, J. The influence of land management on concentrations of  
1882 dissolved organic carbon and its effects on the mobilization of aluminium and iron in podzol  
1883 soils in Mid-Wales. *Soil use and management* 6, 137-145 (1990).
- 1884 711 McDowell, W. H. & Wood, T. Podzolization: soil processes control dissolved organic carbon  
1885 concentrations in stream water. *Soil Science* 137, 23-32 (1984).
- 1886 712 Qualls, R. G. & Richardson, C. J. Factors controlling concentration, export, and decomposition  
1887 of dissolved organic nutrients in the Everglades of Florida. *Biogeochemistry* 62, 197-229  
1888 (2003).
- 1889 713 Yavitt, J. Carbon dynamics in Appalachian peatlands of west Virginia and western Maryland.

- 1890 Water, Air, and Soil Pollution 77, 271-290 (1994).
- 1891 714 Fröberg, M. et al. Low dissolved organic carbon input from fresh litter to deep mineral soils.  
1892 Soil Science Society of America Journal 71, 347-354 (2007).
- 1893 715 Yang, G. et al. Responses of CO<sub>2</sub> emission and pore water DOC concentration to soil warming  
1894 and water table drawdown in Zoige Peatlands. Atmospheric Environment 152, 323-329 (2017).
- 1895 716 Ying, C., Shaoqiang, W., Jingyuan, W., Peichl, M. & Falahatar, S. Dissolved organic carbon  
1896 dynamics and controls of planted slash pine forest soil in subtropical region in southern China.  
1897 Journal of Resources and Ecology 4, 105-114 (2013).
- 1898 717 Pesántez, J., Mosquera, G. M., Crespo, P., Breuer, L. & Windhorst, D. Effect of land cover and  
1899 hydro-meteorological controls on soil water DOC concentrations in a high-elevation tropical  
1900 environment. Hydrological Processes 32, 2624-2635 (2018).
- 1901 718 Panneer Selvam, B., Laudon, H., Guillemette, F. & Berggren, M. Influence of soil frost on the  
1902 character and degradability of dissolved organic carbon in boreal forest soils. Journal of  
1903 Geophysical Research: Biogeosciences 121, 829-840 (2016).
- 1904 719 Andreasson, F., Bergkvist, B. & Bååh, E. Bioavailability of DOC in leachates, soil matrix  
1905 solutions and soil water extracts from beech forest floors. Soil Biology and Biochemistry 41,  
1906 1652-1658 (2009).
- 1907 720 Ågren, A. M., Haei, M., Blomkvist, P., Nilsson, M. B. & Laudon, H. Soil frost enhances stream  
1908 dissolved organic carbon concentrations during episodic spring snow melt from boreal mires.  
1909 Global Change Biology 18, 1895-1903 (2012).
- 1910 721 Raastad, I. A. & Mulder, J. Dissolved organic matter (DOM) in acid forest soils at Gådsjön  
1911 (Sweden): natural variabilities and effects of increased input of nitrogen and of reversal of  
1912 acidification. Water, air and soil pollution 114, 199 (1999).
- 1913 722 Shafiquzzaman, M. et al. Identification and characterization of dissolved organic matter sources  
1914 in Kushiro river impacted by a wetland. Ecological engineering 70, 459-464 (2014).
- 1915 723 Kawahigashi, M., Sumida, H. & Yamamoto, K. Seasonal changes in organic compounds in soil  
1916 solutions obtained from volcanic ash soils under different land uses. Geoderma 113, 381-396  
1917 (2003).
- 1918 724 Funakawa, S., Hirai, H. & Kyuma, K. Soil-forming processes under natural forest north of  
1919 Kyoto in relation to soil solution composition. Soil Science and Plant Nutrition 38, 101-112  
1920 (1992).
- 1921 725 Stumpe, B. & Marschner, B. Dissolved organic carbon from sewage sludge and manure can  
1922 affect estrogen sorption and mineralization in soils. Environmental Pollution 158, 148-154  
1923 (2010).
- 1924 726 Macdonald, A., Murphy, D., Mahieu, N. & Fillery, I. Labile soil organic matter pools under a  
1925 mixed grass/lucerne pasture and adjacent native bush in Western Australia. Soil Research 45,  
1926 333-343 (2007).
- 1927 727 Camino-Serrano, M. et al. ORCHIDEE-SOM: modeling soil organic carbon (SOC) and  
1928 dissolved organic carbon (DOC) dynamics along vertical soil profiles in Europe. Geoscientific  
1929 Model Development 11, 937-957 (2018).
- 1930 728 Marques, J. D. d. O., Luiz ão, F. J., Teixeira, W. G. & Ferreira, S. J. F. Variations of dissolved  
1931 organic carbon and soil physical properties under different land uses in Central Amazônia.  
1932 Volume 36, Número 2, Pags. 611-622 (2012).
- 1933 729 Lu, Y., Wassmann, R., Neue, H.-U. & Huang, C. Dynamics of dissolved organic carbon and

- 1934 methane emissions in a flooded rice soil. *Soil Science Society of America Journal* 64,  
1935 2011-2017 (2000).
- 1936 730 Oosterwoud, M., Temminghoff, E. & van der Zee, S. Quantification of DOC concentrations in  
1937 relation with soil properties of soils in tundra and taiga of Northern European Russia.  
1938 *Biogeosciences Discussions* 7, 3189-3226 (2010).
- 1939 731 Buckeridge, K. M., Cen, Y.-P., Layzell, D. B. & Grogan, P. Soil biogeochemistry during the  
1940 early spring in low arctic mesic tundra and the impacts of deepened snow and enhanced nitrogen  
1941 availability. *Biogeochemistry* 99, 127-141 (2010).
- 1942 732 Fang, H. et al. Experimental nitrogen deposition alters the quantity and quality of soil dissolved  
1943 organic carbon in an alpine meadow on the Qinghai-Tibetan Plateau. *Applied Soil Ecology* 81,  
1944 1-11 (2014).
- 1945 733 Fang, H. et al. Changes in soil heterotrophic respiration, carbon availability, and microbial  
1946 function in seven forests along a climate gradient. *Ecological Research* 29, 1077-1086 (2014).
- 1947 734 Iqbal, J. et al. Microbial biomass, and dissolved organic carbon and nitrogen strongly affect soil  
1948 respiration in different land uses: A case study at Three Gorges Reservoir Area, South China.  
1949 *Agriculture, Ecosystems & Environment* 137, 294-307 (2010).
- 1950 735 Jones, D., Hughes, L., Murphy, D. & Healey, J. Dissolved organic carbon and nitrogen  
1951 dynamics in temperate coniferous forest plantations. *European journal of soil science* 59,  
1952 1038-1048 (2008).
- 1953 736 Li, W. et al. Soil available nitrogen, dissolved organic carbon and microbial biomass content  
1954 along altitudinal gradient of the eastern slope of Gongga Mountain. *Acta Ecologica Sinica* 33,  
1955 266-271 (2013).
- 1956 737 Liu, C. P. & Sheu, B. H. Dissolved organic carbon in precipitation, throughfall, stemflow, soil  
1957 solution, and stream water at the Guandaushi subtropical forest in Taiwan. *Forest Ecology and*  
1958 *Management* 172, 315-325 (2003).
- 1959 738 Linghong Z. Effects of Winter Green Manure Crops with and Without Chicken Grazing on CH<sub>4</sub>  
1960 and CO<sub>2</sub> Emissions, Soil Nutrients and Yield in a Double-Crop Rice Paddy Field in South  
1961 China. 2017. (In Chinese)
- 1962 739 Shan L. The study on N<sub>2</sub>O flux from different land uses in three gorges reservoir area. 2011. (In  
1963 Chinese)
- 1964 740 Guo, K. Effect of Biochars Prepared from Different Feedstocks and Pyrolysis Temperatures on  
1965 the Structure and Function of Microbial Communities in a Bamboo (*Phyllostachys Praecox*)  
1966 Plantation Soil. 2021. (In Chinese)
- 1967 741 Yuan, Q. Study on soil organic carbon fractions in different land use types. 2013. (In Chinese)
- 1968 742 Yin, Y. Effects of biochars addition on the mineralization of soil organic carbon under different  
1969 incubation conditions. 2018. (In Chinese)
- 1970 743 Ai, N. Nitrogen immobilization by soil microbial biomass and its control in different soils. 2008.  
1971 (In Chinese)
- 1972 744 Li, L. Effects of different N level on soil organic carbon stability in meadow chernozemic soil.  
1973 2014. (In Chinese)
- 1974 745 Liang, H. Effect of different fertilization on CO<sub>2</sub> emission for a paddy-upland rotation purple  
1975 soil under wheat. 2011. (In Chinese)
- 1976 746 Chen, J. Effects of different fertilizer sources and tillage practices on GHG emissions and soil  
1977 carbon pool in paddy fields. 2016. (In Chinese)

- 1978 747 Wang, Q. Effects of different ways of straw returning on soil greenhouse gas emissions in  
1979 sloping cropland. 2016. (In Chinese)
- 1980 748 Zhou, W. Temperature Sensitivity and Driving Factors Analysis of Soil Organic Carbon  
1981 Decomposition across Chinese Typical Cropland. 2020. (In Chinese)
- 1982 749 Pei, X. Effect of long-term fertilization on diversity of soil microbial community structure under  
1983 different cropping systems. 2010. (In Chinese)
- 1984 750 Yin, C. Responses of N<sub>2</sub>O Emission and Reduction as well as Associated Microbes to  
1985 Temperature and Different Fertilization Regimes in Arable Soils. 2017. (In Chinese)
- 1986 751 Gao, Z. Contents and characteristics of soluble organic carbon, nitrogen in the arable soil. 2009.  
1987 (In Chinese)
- 1988 752 Liu, Y. Effects of Organic Fertilizer Substituting Mineral Nitrogen Fertilizer on Soil Carbon and  
1989 753 Absorbed Nutrient in Spring Wheat. 2021. (In Chinese)
- 1990 753 Zhang, L. Intergrative effects of green manure and straw incorporation on greenhouse gas  
1991 emissions and environmental performance under the typical rice cropping systems in southern  
1992 china. 2018. (In Chinese)
- 1993 754 Zhou, G. The Characteristics of Carbon and Nitrogen Transformation under the  
1994 Co-incorporation of Rice Straw and Leguminous Green Manures in Double Rice Field in  
1995 Southern China. 2017. (In Chinese)
- 1996 755 Wu, L. Effects of land-use conversion from double-rice to vegetable cultivation on net  
1997 ecosystem carbon budget and greenhouse gas emissions. 2018. (In Chinese)
- 1998 756 Cheng, H. Responses of soil active organic carbon, nitrogen and rice yield to Chinese milk vetch  
1999 application rates. 2020. (In Chinese)
- 2000 757 Yu, J. Study on the effect of fertilizing management on carbon and nitrogen of black soil. 2010.  
2001 (In Chinese)
- 2002 758 Wang, Y. Effects of water and fertilizer treatments based on vetch and *oryzophragmus*  
2003 *violaceus* on soil fertility and composition of active organic carbon. 2020. (In Chinese)
- 2004 759 Guo, Y. Effects of exogenous carbon addition on organic carbon mineralization, humification  
2005 and enzyme activities in agricultural soils. 2020. (In Chinese)
- 2006 760 Li, Y. Effects of multi-year application of biochar on carbon cycle of tobacco-growing soils in  
2007 Henan Province. 2019. (In Chinese)
- 2008 761 Zhu, W. Effect of combined amendment of wheat and huai bean straws on soil organic carbon  
2009 sequestration. 2018. (In Chinese)
- 2010 762 Chang, D. Characteristics of Soil Dissolved Organic Matter in Main Green Manure Plantation  
2011 Systems in China. 2015. (In Chinese)
- 2012 763 Zhang, W. Effects of amendments on soil organic carbon fractions and microbial in upland red  
2013 soil. 2017. (In Chinese)
- 2014 764 Deng, B. Effects of ameliorant application on greenhouse gas emissions from *camellia oleifera*  
2015 plantation soil under nitrogen fertilization. 2020. (In Chinese)
- 2016 765 Zhu, J. Study on the change of soil organic carbon and the prediction model of total organic  
2017 carbon based on hyperspectral after biochar addition. 2017. (In Chinese)
- 2018 766 Yang, X. Study of application nitrogen fertilizer rate on soil labile pools and their effects in  
2019 different managements condition. 2016. (In Chinese)
- 2020 767 Pu, D. Effects of application of biogas slurry and biochar on soil active organic carbon and  
2021 nitrogen in poplar forest. 2015. (In Chinese)

- 2022 768 Xu, Y. Application of rice straw and engineered bacteria on the biochemical properties of cu and  
2023 cd-polluted soil. 2011. (In Chinese)
- 2024 769 Yu, P. Characteristics and mechanisms of organic matter mineralization influenced by  
2025 fertilization and land use in red soil and paddy soil. 2021. (In Chinese)
- 2026 770 Chen, W. Fertilization effects on active organic carbons and soil structure in black soil farmland  
2027 with different soil organic matter contents. 2013. (In Chinese)
- 2028 771 Liu, S. Preliminary mechanism study on the effect of fertilization on reactive minerals and their  
2029 carbon sequestration in upland red soil. 2016. (In Chinese)
- 2030 772 Sun, D. Effect of fertilization practice on the constitution and bioavailability of dissolved  
2031 organic carbon in red paddy soil. 2014. (In Chinese)
- 2032 773 Ji, X. Effects of Combined Application of Organic and Inorganic Fertilizers on Carbon and  
2033 Nitrogen Characteristics and Bacterial Community Structure of Purple Soil. 2020. (In Chinese)
- 2034 774 Xu, L. Effects of Liquid Organic Fertilizer Application on Soil Biological Properties and Active  
2035 Organic Carbon Components in Navel Orange Orchard. 2021. (In Chinese)
- 2036 775 Sun, H. Effect of Organic Fertilizer and Inorganic Fertilizer Application on N<sub>2</sub>O and NO  
2037 Emissions from Fluvo-aquic Soil in the North China Plain. 2020. (In Chinese)
- 2038 776 Liu, R. Study on the mechanism of the improvement of soil organic matter under simulated  
2039 maize straw and biochar returning in a black soil. 2021. (In Chinese)
- 2040 777 Yang, J. Dynamic and leaching characteristics of soluble organic nitrogen compositions in  
2041 paddy soil under different fertilization treatments during rice growth period. 2018. (In Chinese)
- 2042 778 Shen, Z. CO<sub>2</sub> and N<sub>2</sub>O Emission Characteristics and Impact Factors in Farmland under Biogas  
2043 Slurry Irrigation. 2015. (In Chinese)
- 2044 779 Zhao, L. Effects of fertilization on cucumber growth and soil fertility in greenhouse continuous  
2045 cropping under soil deterioration. 2015. (In Chinese)
- 2046 780 Zheng, L. Effects of combined applications of pig manure and chemical fertilizers on CH<sub>4</sub> and  
2047 N<sub>2</sub>O emissions and their global warming potentials in paddy fields with double-rice cropping.  
2048 2015. (In Chinese)
- 2049 781 Lu, Y. Influences of combining biochar and nitrogen fertilization on red soil nematode  
2050 assemblages and soil enzyme activities. 2015. (In Chinese)
- 2051 782 Yu, L. The effects of biochar on acidic soil amelioration and soil nitrification. 2019. (In Chinese)
- 2052 783 Wu, Y. Effects of biochar application on bacterial diversity and physical-chemical properties in  
2053 fluvor-aquic soil of north China. 2014. (In Chinese)
- 2054 784 Wang, J. Effect of biochar application on the composition and stability of organic carbon in deep  
2055 paddy soil. 2020. (In Chinese)
- 2056 785 Xue, S. Effects of biochar addition on soil labile C and N contents in a subtropical evergreen  
2057 forest. 2018. (In Chinese)
- 2058 786 Yu, M. Charosphere Effects of Biochar and Its Associated Key Processes of Soil Nitrogen  
2059 Transformation. 2021. (In Chinese)
- 2060 787 An, Y. Effect of biochar application on soil aggregates distribution and organic carbon fractions.  
2061 2016. (In Chinese)
- 2062 788 Xu, L. Effect of biochar on soil prosperities and soil organic carbon pool. 2013. (In Chinese)
- 2063 789 Ran, J. Effects of phosphorus fertilizer application and different optimized measures on  
2064 rhizosphere process, yield and phosphorus use efficiency of winter wheat in dryland. 2021. (In  
2065 Chinese)

- 2066 790 Wang, W. Impact of Annual Straw Management and Fertilizer on Agriculture Ecosystem  
2067 Greenhouse Gas Emissions and Productivity in Wheat-Maize Rotation System. 2019. (In  
2068 Chinese)
- 2069 791 Wang, P. Remediation of cu and cd-contaminated soil by joint application of straw and  
2070 engineered bacteria. 2011. (In Chinese)
- 2071 792 Wen, D. Effects of straw biochar application on tobacco soil carbon and nitrogen forms and  
2072 related enzyme activities. 2017. (In Chinese)
- 2073 793 Ma, Y. Effect of application of straw-derived biochar on denitrification and anammox in paddy  
2074 soil. 2020. (In Chinese)
- 2075 794 Guo, C. Effects of cotton straw incorporation on soil microbial biomass carbon, nitrogen,  
2076 phosphorus and Soil Dissolved Organic Carbon of continuous cropping cotton field. 2015. (In  
2077 Chinese)
- 2078 795 Li, C. Study on the effect of corn straw on mian physical and chemical characteristics of black  
2079 soil. 2012. (In Chinese)
- 2080 796 Ye, C. Effects of Straw Returning Methods and Quantities on Organic Carbon and Nitrogen  
2081 components in Brown Earth and the Growth of Maize. 2019. (In Chinese)
- 2082 797 Xu, Y. Changes of Contents and Chemical Composition of Soil Labile Organic Carbon Fractions  
2083 and its Correlation with Soil Enzyme Activities under Straw Incorporation Condition. 2018. (In  
2084 Chinese)
- 2085 798 Pei, P. Effects of Straw Incorporation Coupled Nitrogen levels on Biochemical Properties of  
2086 Paddy Soil and Growth Characteristics of Rice. 2014. (In Chinese)
- 2087 799 Su, Y. Effects of long-term straw return on n<sub>2</sub>o and no emissions from wheat-maize rotation  
2088 system in purplish soil. 2021. (In Chinese)
- 2089 800 Li, X. Effect of combination of rice husk biochar and organic fertilizers on soil organic carbon  
2090 fractions and soil microbial community of apple orchard. 2016. (In Chinese)
- 2091 801 Hu, X. Effects on soil fertility in the application of organic materials in paddy field. 2019. (In  
2092 Chinese)
- 2093 802 Huang, X. Mechanisms of the interaction between poorly crystalline iron oxides and soil  
2094 organic carbon in a rice-wheat cropping system. 2017. (In Chinese)
- 2095 803 Xia, Z. Nitrogen and carbon transformation in soil of maize/fabe-bean intercropping system.  
2096 2011. (In Chinese)
- 2097 804 Li, Y. Effects of plastic film mulching and fertilization on soil respiration and carbon stocks on  
2098 the Loess Plateau cropland. 2021. (In Chinese)
- 2099 805 Luo, P. Effect of long-term fertilization on microbial community in a brown soil under  
2100 crop-rotation system. 2014. (In Chinese)
- 2101 806 Dao, L. Emission characteristics of co<sub>2</sub> and ch<sub>4</sub> on dryland under different long-term  
2102 fertilizations. 2018. (In Chinese)
- 2103 807 Huang, C. Regulation of long-term fertilization on iron oxides and organic carbon preservation  
2104 in soils. 2015. (In Chinese)
- 2105 808 Guo, Y. Emission characteristics of co<sub>2</sub> and ch<sub>4</sub> on dryland lou soil under different long-term  
2106 fertilizations. 2017. (In Chinese)
- 2107 809 Hao, X. Effect of long-term fertilization on soil organic carbon, organic nitrogen and microbial  
2108 properties in subtropical paddy soils. 2008. (In Chinese)
- 2109 810 Li, D. Influence of long-term fertilization on AM fungi community in a brown soil. 2018. (In

- 2110 Chinese)
- 2111 811 Rong, J. Effects of long-term fertilization on soil carbon pool and distribution characteristics of  
2112 aggregates in oasis farmland. 2012. (In Chinese)
- 2113 812 Kong, F. Relationship between humus carbon and microbial community structure and function  
2114 in long-term fertilized red soil aggregates. 2020. (In Chinese)
- 2115 813 Zhang, J. Changes of winter wheat yield and soil fertility under long-term straw management  
2116 and nitrogen application. 2018. (In Chinese)
- 2117 814 Huang, W. Research on the difference of soil organic carbon, nitrogen fractions and yield in  
2118 double-cropped paddy in south china under long-term straw return. 2020. (In Chinese)
- 2119 815 Yao, F. Effect of long-term rotation fertilization on ammonia oxidation microorganisms  
2120 abundance in brown soil. 2016. (In Chinese)
- 2121 816 Li, X. Response mechanism of soil organic carbon to different agricultural tillage methods in the  
2122 north of yinshan. 2017. (In Chinese)
- 2123 817 Peng, Y. Response of Soil Respiration to Addition of Nitrogen and Phosphorus and Influencing  
2124 Factors of Dry Farmland in Longzhong. 2021. (In Chinese)
- 2125 818 Huang, T. Intercropping and fertilization of forage rape with sorghum in feed rapeseed effect of  
2126 yield quality and soil organic carbon composition. 2020. (In Chinese)
- 2127 819 Song, J. Response of soil organic carbon and crop yield to long-term fertilization and climate  
2128 change in winter-wheat and summer-maize rotation. 2021. (In Chinese)
- 2129 820 Luo, K. Black soil carbon nitrogen and its fraction in response to long-term fertilization. 2012.  
2130 (In Chinese)
- 2131 821 Luo, C. Effects of structural variation on wheat productivity and soil quality and its mechanism  
2132 under ridge-furrow mulching farming system in semiarid East African Plateau. 2020. (In  
2133 Chinese)
- 2134 822 Qi, R. Responses of Soil Organic Carbon Mineralization under Long-term Fertilization Regimes  
2135 to Temperature Changes and Cattle Manure Addition. 2016. (In Chinese)
- 2136 823 Chen, L. Study on effects of the typical rice-wheat herbicides influencing on CH<sub>4</sub> and N<sub>2</sub>O  
2137 emissions from croplands ecosystem. 2014. (In Chinese)
- 2138 824 Yu, Z. Seasonal variations of microbial community structures and functions in cultivated and  
2139 natural restored Mollisols. 2012. (In Chinese)
- 2140 825 Jiang, Y. Effects of Inhibitors and Controlled Release Fertilizers on N<sub>2</sub>O and NO Emissions  
2141 from Fluvo-aquic Soil in the Old Course of Yellow. 2020. (In Chinese)
- 2142 826 Kuang, E. Analysis of DOC component structure in straw deep-combed black soil profile based  
2143 on fluorescence spectrum. 2022. (In Chinese)
- 2144 827 Zhao, X. Response of dissolved organic matter chemical properties to long-term different  
2145 fertilization in latosol: insight from ultraviolet-visible spectroscopy. 2022. (In Chinese)
- 2146 828 Zhang, J. Effects of Organic Fertilizer Substituting Mineral Nitrogen Fertilizer on Soil Carbon  
2147 and Absorbed Nutrient in Spring Wheat. 2022. (In Chinese)
- 2148 829 Liu, Z. The effects of different straw-derived biochars and tillage measures on soil carbon. 2021.  
2149 (In Chinese)
- 2150 830 Lu, S. Effects of different tillage and fertilization measures on soil nutrients, organic carbon and  
2151 microbial community functional diversity in Weibei Highland. 2020. (In Chinese)
- 2152 831 Pan, X. Effects of different tillage managements on soil carbon and nitrogen cycling microbial  
2153 diversity under double-cropping rice field. 2020. (In Chinese)



- 2154 832 Li, S. Effects of different tillage patterns on greenhouse gas emission and nitrogen uptake of rice.  
2155 2016. (In Chinese)
- 2156 833 Wang, X. Effects of conservation tillage on the indicators and correlations of soil organic carbon.  
2157 2009. (In Chinese)
- 2158 834 Wang, C. Effects of conservation tillage measures on the contents and properties of organic  
2159 carbon and nitrogen in lou soil. 2010. (In Chinese)
- 2160 835 Guo, L. Effects of no-tillage and straw return on soil organic carbon pool and microbial  
2161 diversity in rice-wheat systems. 2018. (In Chinese)
- 2162 836 Li, D. The dynamic of methane emission and the community structure and population of  
2163 methanogens under no-tillage non-flooded with straw mulching paddy field of southeast china.  
2164 2010. (In Chinese)
- 2165 837 Zhang, R. Paddy soil respiration and organic carbon fractions under wide ridge cultivated with  
2166 no-tillage in central China. 2015. (In Chinese)
- 2167 838 Liu, X. Effects of Deep Loosening and Deep Straw Returning on Soil Organic Carbon and  
2168 Microbial Community Characteristics in Black Soil. 2019. (In Chinese)
- 2169 839 Yan, X. Effects of cotton stubble returning and plowing on soil physicochemical properties and  
2170 microbial community struction in cosstal saline soil. 2021. (In Chinese)
- 2171 840 Meng, Y. Effects of straw incorporation on soil carbon-nitrogen conversion and crop growth in a  
2172 rice-wheat rotation system. 2020. (In Chinese)
- 2173 841 Kou, Z. Effects of tillage and application of fertilizer on paddy soil carbon emission and carbon  
2174 balance. 2011. (In Chinese)
- 2175 842 Wang, J. Effect of Different Tillage Practices on Soil Organic Carbon Transformation and Water  
2176 Use in Dryland Winter Wheat. 2014. (In Chinese)
- 2177 843 Wu, Y. The effect of tillage systems on organic carbon fractions in a purple paddy soil. 2012. (In  
2178 Chinese)
- 2179 844 Wang, X. Effects of returning mode and straw-decomposing inoculant on decomposition  
2180 characteristics and soil nutrient content of maize straw. 2020. (In Chinese)
- 2181 845 Teclerariam, S. G. Effect of on-tillage on soil organic carbon and nitrogen and their pools in  
2182 rainfed agriculture of northern china. 2012. (In Chinese)
- 2183 846 Li, J. Long-term tillage effects on soil aggregate organic carbon and microbial community  
2184 diversity. 2014. (In Chinese)
- 2185 847 Hao, M. Changes of soil organic carbon components and relationships with soil microbial  
2186 diversity in wheat-maize crop system. 2018. (In Chinese)
- 2187 848 Wang, Y. Effects of Different Elevated CO<sub>2</sub> Concentrations on CH<sub>4</sub> Emission and its  
2188 Mechanism in Paddy Fields. 2021. (In Chinese)
- 2189 849 Yu, C. Soil microbial responses to global change in a semi-arid steppe in northern china. 2016.  
2190 (In Chinese)
- 2191 850 Zhou, G. Responses of soil respiration to simulated drought and nitrogen addition in a  
2192 subtropical evergreen broad-leaved forest. 2020. (In Chinese)
- 2193 851 Wu, Y. Effects of litter and nitrogen addition on carbon and nitrogen of soil fractions in  
2194 *Castanopsis faberi* Hance forest. 2019. (In Chinese)
- 2195 852 Chen, L. Response of soil nitrogen cycling to simulated rainfall reduction in Red Vertebra  
2196 plantation, South Subtropical region. 2019. (In Chinese)
- 2197 853 Zhang, J. Characteristics and influence factors of soil respiration in alpine marsh meadow under

- 2198 warming and nitrogen application. 2021. (In Chinese)
- 2199 854 Zhao, S. Influence of Arbuscular Mycorrhizal Fungi on Soil Aggregates and Carbon Storage  
2200 under Warming and Nitrogen Addition in Songnen Grassland. 2021. (In Chinese)
- 2201 855 Zhong, Z. Effects of experimental warming and precipitation manipulation on the key processes  
2202 of soil carbon cycle in abandoned farmland of the loess hilly region. 2021. (In Chinese)
- 2203 856 Zheng, Y. Effects of soil warming and precipitation exclusion on soil respiration of chinese fir  
2204 plantation and its mechanism in mid-subtropical china. 2017. (In Chinese)
- 2205 857 Bai, H. The effect of warming on the change of soil organic carbon and its components in  
2206 subtropical forests. 2020. (In Chinese)
- 2207 858 Li, Y. Effect of Warming on N<sub>2</sub>O Emission on Alpine Meadow and Cultivated Grassland in the  
2208 Qinghai Tibet Plateau. 2020. (In Chinese)
- 2209 859 Zhou, W. Effects of increasing atmospheric temperature and carbon dioxide concentration on  
2210 CH<sub>4</sub> and N<sub>2</sub>O emissions and microorganisms in paddy fields. 2017. (In Chinese)
- 2211 860 Li, D. Nitrogen application has effect on soil of *Schima superba* forest in Tiantong Influence of  
2212 carbon pool formation and decomposition. 2015. (In Chinese)
- 2213 861 Wang, Y. Effect of simulated warming and throughfall reduction on soil respiration and  
2214 microbial response in Warm-temperate oak (*Quercus aliena* var. *acuteserrata*) forest. 2015. (In  
2215 Chinese)
- 2216 862 Yang, C. Effects of simulated warming on soil inorganic nitrogen in a young and a mature  
2217 *Cunninghamia lanceolata* stand in humid. 2020. (In Chinese)
- 2218 863 Pan, X. Effects of simulated warming and nitrogen deposition on soil respiration and DOM in  
2219 soil solution. 2016. (In Chinese)
- 2220 864 Wang, X. Effects of simulated warming and precipitation increasing on soil carbon composition  
2221 and respiration of abandoned grassland in the loess hilly region. 2021. (In Chinese)
- 2222 865 Gou, X. Effect of simulated climate warming on soil carbon and nitrogen transformation in the  
2223 alpine forest of western sichuan. 2014. (In Chinese)
- 2224 866 Chao, A. Effects of simulated climate change on greenhouse gas fluxes in typical steppe  
2225 ecosystem. 2019. (In Chinese)
- 2226 867 Xiong, L. Changes molecular composition of rice root exudates and soil organic matter in a rice  
2227 paddy under simulated climate change. 2020. (In Chinese)
- 2228 868 Lei, Z. Effects of simulated nitrogen deposition and biochar addition on dissolved organic  
2229 carbon and nitrogen in Moso bamboo plantation. 2019. (In Chinese)
- 2230 869 Wang, C. Effects of simulated nitrogen deposition and acidification on soil properties in Yunwu  
2231 Mountain grassland. 2020. (In Chinese)
- 2232 870 Chu, X. Effects of Simulated Nitrogen Deposition on Soil Nitrogen Mineralization in *Quercus*  
2233 *Acutissima* Forest of Urban and Rural Areas. 2021. (In Chinese)
- 2234 871 Peng, Y. Effects of simulated nitrogen deposition on belowground carbon cycling processes and  
2235 soil biochemical characteristics in a secondary evergreen broad-leaved forest on Wawu  
2236 Mountain. 2016. (In Chinese)
- 2237 872 Zhang, J. Effect of simulated nitrogen deposition on soil carbon budget progress in a *larix*  
2238 *olgensis* plantation forest. 2016. (In Chinese)
- 2239 873 Qu, W. Effects of stimulated nitrogen deposition on soil carbon budget in the Yellow River Delta  
2240 Wetland. 2021. (In Chinese)
- 2241 874 Li, J. Effects of simulated nitrogen input on the key processes of carbon cycle in a salt marsh in

- 2242 the Yellow River Delta. 2021. (In Chinese)
- 2243 875 Wang, N. Effects of simulated acid rain on the roots and soil ecological processes of a  
2244 subtropical broadleaf *pyllostachys edulis* mixed stand. 2020. (In Chinese)
- 2245 876 An, W. Effects of simulated acid rain on nutrient dynamics of paddy field and greenhouse gases  
2246 emission in fuzhou plain. 2017. (In Chinese)
- 2247 877 Zhang, M. Effects of nitrogen and litter addition on soil organic carbon pool components in  
2248 Minjiang River estuary wetland. 2019. (In Chinese)
- 2249 878 Xu, W. Study on effects of nitrogen deposition, grazing and extreme precipitation on N<sub>2</sub>O  
2250 emissions in a *leymus chinensis* meadow. 2021. (In Chinese)
- 2251 879 Zhang, C. Effects of nitrogen deposition and acidity mitigation on plant fine root functional  
2252 traits and ecological process in red soil region. 2020. (In Chinese)
- 2253 880 Hao, Y. Effects of nitrogen deposition on soil organic carbon and microbial properties in  
2254 evergreen broad-leaved forests of subtropics. 2018. (In Chinese)
- 2255 881 Cui, J. Mechanism of nitrogen deposition on undergrowth and soil bacterial community  
2256 diversity in subtropical evergreen broad-leaved forest. 2017. (In Chinese)
- 2257 882 Li, J. Effects of nitrogen deposition on soil aggregate and organic carbon stability in subtropical  
2258 forest. 2016. (In Chinese)
- 2259 883 Zhao, S. Effects of nitrogen deposition on soil organic carbon in shrub grass tundra of Changbai  
2260 Mountain. 2021. (In Chinese)
- 2261 884 Wang, M. Effects of millipedes on microbial community structure and oxidase activity under the  
2262 nitrogen deposition. 2019. (In Chinese)
- 2263 885 Zhang, H. Effect of nitrogen addition on growth and soil nutrients of *cunninghamia lanceolata*  
2264 plantation. 2017. (In Chinese)
- 2265 886 Xu, K. Effects of simulated nitrogen deposition on soil active organic carbon in poplar  
2266 plantations in a coastal area, China. 2014. (In Chinese)
- 2267 887 Song, J. Effects of nitrogen and phosphorus additions on soil organic carbon fractions and  
2268 aggregate stability in a subtropical evergreen broad-leaved forest. 2020. (In Chinese)
- 2269 888 Li, L. Effect of N and P additions on C and N pools of rhizosphere and non-rhizosphere soils on a  
2270 subtropical evergreen broad-leaved forest. 2017. (In Chinese)
- 2271 889 Ling, X. Effects of nitrogen and phosphorus addition on the structure, carbon content and  
2272 stability of soil aggregates in Songnen grassland. 2020. (In Chinese)
- 2273 890 Li, C. Effects of wet deposition of nitrogen and phosphorus and litter addition on soil active  
2274 organic carbon pool and nitrogen and phosphorus in broad leaved *pinus koraiensis* forest. 2020.  
2275 (In Chinese)
- 2276 891 Wang, Y. Effect of adding a combination of nitrogen and phosphorus on fine root and soil  
2277 microbes of *machilus pauhoi*. 2018. (In Chinese)
- 2278 892 Zhang, Q. Short-term effects of soil warming and nitrogen addition on the CNP stoichiometry  
2279 and physiological ecology of *cunninghamia lanceolata* in subtropical regions. 2017. (In Chinese)
- 2280 893 Guo, J. Response of main mineral bioavailability to atmospheric CO<sub>2</sub> emission in paddy  
2281 ecosystem. 2011. (In Chinese)
- 2282 894 Liu, Y. Legacy effects of historical nitrogen and water addition on soil microbiological  
2283 characteristics in a typical steppe. 2021. (In Chinese)
- 2284 895 Li, Y. Effects of precipitation reduction and nitrogen addition on soil organic carbon content and  
2285 soil microbial community in subtropical mountain forests. 2020. (In Chinese)

- 2286 896 Tao, D. Effects of Precipitation Changes and Nutrient Addition on Ecosystem Carbon Exchange  
2287 of a Meadow Grassland in Hulunber. 2021. (In Chinese)
- 2288 897 Huang, Y. Effect of precipitation exclusion on castanopsis carlesil natural forest soil methane  
2289 uptake and methanotrophs community structure. 2014. (In Chinese)
- 2290 898 Li, H. Effects of simulated warming on active soil organic carbon and nitrogen of the alpine  
2291 timberline. 2018. (In Chinese)
- 2292 899 Wang, A. Effect of seasonal freeze-thaw on soil microbial and biochemical property in alpine  
2293 forest soil. 2012. (In Chinese)
- 2294 900 Guo, Q. Effect of nitrogen addition on growth and soil nutrient of cunninghamia lanceolate  
2295 plantation. 2016. (In Chinese)
- 2296 901 Huo, L. Impact of Buring Straw Layer Along With Plastic Mulching on Saline Soil Organic  
2297 Carbon and CO<sub>2</sub> Emission in Hetao Irrigation District. 2015. (In Chinese)
- 2298 902 Gao, G. Effects of Freezing on the Sediment Environment and Microorganism around Roots of  
2299 Typical Wetland Plants in Agricultural Drainage Ditch. 2021. (In Chinese)
- 2300 903 Huang, R. Effects of biological regulated measures on soil physicochemical properties and  
2301 runoff-sediment yield in three gorges reservoir region. 2013. (In Chinese)
- 2302 904 Yong, Y. Changes of Nutrients in Grassland of Typical Ecological Animal Husbandry  
2303 Cooperatives and Their Relationship with Sustainable Production in the Three Rivers Source  
2304 Region. 2016. (In Chinese)
- 2305 905 Zhou, F. Soil microbial community structure and function under plantations of different tree  
2306 species. 2017. (In Chinese)
- 2307 906 Zhang, P. Effects of different winter planting patterns on soil physical and chemical properties  
2308 and microbial diversity in double cropping rice fields. 2020. (In Chinese)
- 2309 907 Gu, H. Differences and Influencing Factors of PLFA Fingerprints under Different Land Use  
2310 Patterns in Red Soil. 2021. (In Chinese)
- 2311 908 Yang, Y. The structure of soil organic carbon and enzyme activity under different land types.  
2312 2017. (In Chinese)
- 2313 909 Jiang, J. Study on the response of autotrophic bacterial community and microbial carbon  
2314 sequestration to soil erosion under different soil types. 2019. (In Chinese)
- 2315 910 Di, J. Effects of different intercropping models of torreya grandis on soil physicochemical  
2316 properties and bacterial diversity. 2020. (In Chinese)
- 2317 911 Zhang, B. Study on Soil Nitrification, Denitrification and Functional Microorganisms of  
2318 Cunninghamia lanceolata Forest at Different Ages. 2020. (In Chinese)
- 2319 912 Zhu, X. Short-term effects of different regenerations after clearfelling on soil greenhouse gases  
2320 in Chinese fir plantation. 2016. (In Chinese)
- 2321 913 Li, Y. Dynamic study of soil organic carbon and soil respiration in different regeneration  
2322 patterns of Chinese fir plantation. 2010. (In Chinese)
- 2323 914 Yang, J. Studies on soil nitrogen transformations and the functional microorganisms in natural  
2324 secondary forests with different ages. 2020. (In Chinese)
- 2325 915 Huang, L. The influence of different vegetation restoration patterns on physical property and  
2326 soil labile carbon in degraded purple soil. 2015. (In Chinese)
- 2327 916 Wang, N. The research of change rule and characteristics of soil microbial metabolism and the  
2328 important indicators of organic carbon at different altitude. 2015. (In Chinese)
- 2329 917 Ding, X. Effect of different mixed modes on soil organic carbon and soil respiration in

- 2330 phyllostachys heterocyclus. 2009. (In Chinese)
- 2331 918 Pu, Q. Study on soil organic carbon, nitrogen and enzyme activity characteristics with different  
2332 ecological restoration patterns in desert land of northwestern Sichuan, China. 2017. (In Chinese)
- 2333 919 Zhou, H. Variation Characteristics of Organic Carbon and Its Fractions in Soil of Alfalfa  
2334 Grassland with Different Growing Years. 2016. (In Chinese)
- 2335 920 Zhu, H. Effects of different carbon input manipulations on soil carbon, nitrogen and biological  
2336 characteristics of Schrenk's spruce (*Picea schrenkiana*) forest. 2021. (In Chinese)
- 2337 921 Li, X. Variation characteristics of soil carbon and nitrogen components in Tianshui Huanu apple  
2338 orchard with different planting years. 2021. (In Chinese)
- 2339 922 Xu, Q. Study on variation characteristics and influencing factors of soil aggregates in plastic  
2340 shed system during different planting years. 2020. (In Chinese)
- 2341 923 Zhan, M. Study on mechanisms of carbon sequestration, carbon emissions and soil organic  
2342 carbon dynamics in different farming paddy fields. 2009. (In Chinese)
- 2343 924 Wang, W. A preliminary study on soil carbon pool characteristics of poplar plantation under  
2344 different management modes. 2010. (In Chinese)
- 2345 925 Li, Z. Status Analysis of Soil Iron Oxide and Organic Carbon Forms in China's Different  
2346 Fertility Paddy Soils. 2018. (In Chinese)
- 2347 926 Yuan, Z. Response of soil organic matter fractions with different thinning intensities in  
2348 subalpine spruce forest western Sichuan. 2011. (In Chinese)
- 2349 927 Wang, N. Characteristics of carbon pools, nitrogen pools, phosphorus, potassium and nitrogen  
2350 balance, phosphorus balance as well as potassium balance in soil profile in typical spring maize  
2351 planted regions in northeast China. 2016. (In Chinese)
- 2352 928 Liu, T. Effect of forest conversion on quantities and spectroscopic characteristics of soil  
2353 dissolved organic matter in subtropical China. 2015. (In Chinese)
- 2354 929 Zheng, X. Effects of afforestation on soil organic carbon and nutrient content in different trees  
2355 of mid-subtropical China. 2018. (In Chinese)
- 2356 930 Bao, Y. Effects of vegetation types on soil DOM characteristics and microbes in the  
2357 mid-subtropical forests. 2018. (In Chinese)
- 2358 931 Li, J. Response of soil labile organic carbon fractions and carbon mineralization to land-use  
2359 changes in mid-subtropical hilly region of China. 2014. (In Chinese)
- 2360 932 Zhao, P. Changes of soil organic carbon and microbial properties in *Pinus taiwanensis* forest at  
2361 different altitudes in Daiyun Mountain of subtropical. 2019. (In Chinese)
- 2362 933 Chen, X. Effect of land use and landscape position on soil labile organic carbon in the hilly  
2363 red-soil area of the mid-subtropical climatic zone. 2012. (In Chinese)
- 2364 934 Lian, X. Study on emission fluxes of CO<sub>2</sub> and CH<sub>4</sub> and their vertical distribution  
2365 characterizations of soil from wetlands in southeast China. 2014. (In Chinese)
- 2366 935 Wang, Q. Soil microbial respiration rate and its influencing factors along a north-south forest  
2367 transect in eastern China. 2016. (In Chinese)
- 2368 936 Sun, S. Responses of soil carbon and nitrogen cycles to Changes in Global Environmental  
2369 factors —Effects of land use types, N deposition and climate warming on soil C and N cycles.  
2370 2014. (In Chinese)
- 2371 937 Deng, W. Nitrous Oxide Emissions from a Hilly Tea Field in Subtropical China. 2018. (In  
2372 Chinese)
- 2373 938 Zeng, X. Characteristics of soil phosphorus under typical vegetation types in subtropical forests

2374 and the affecting factors. 2019. (In Chinese)

2375 939 Wang, M. Characteristics of dissolved organic carbon in a subtropical forest landscape and its  
2376 sequestration mechanisms. 2019. (In Chinese)

2377 940 Yuan, Z. Characteristics of Carbon Pool and Nutrients under two typical forests in Nanjing Zijin  
2378 Mountain. 2017. (In Chinese)

2379 941 Fei, F. Responses of soil microbial biomass and enzyme activities to forest gap scale. 2015. (In  
2380 Chinese)

2381 942 Mei, J. The characteristic of soil active organic carbon in different forest types in Saihanba.  
2382 2020. (In Chinese)

2383 943 Ding, L. Study on carbon and nitrogen forms and soil enzyme activities of rhizosphere soil of  
2384 main tree species in northern Da Hinggan Ling mountains. 2019. (In Chinese)

2385 944 Tian, S. Study on characteristics of soil labile organic carbon in main forest types in the north of  
2386 Da Hinggan Ling mountains. 2016. (In Chinese)

2387 945 Li, S. Characteristics of soil carbon change during forest succession in Da Hinggan mountains.  
2388 2019. (In Chinese)

2389 946 Sun, L. The Dynamics of Soil Organic Carbon Fractions in Different Vegetation Types of  
2390 Tianshan Forest. 2018. (In Chinese)

2391 947 Zhou, H. Study on Runoff and Sediment Yield Process of the Cross Ridge and Longitudinal  
2392 Ridge Slope under Natural Rainfall. 2018. (In Chinese)

2393 948 Zhang, Y. Abundance and diversity of soil nematode community in natural at different altitudes  
2394 in cold-temperate climate zone. 2021. (In Chinese)

2395 949 Wu, R. Research on soil microbial properties in *Larix principis-rupprechtii* plantation at Taiyue,  
2396 Shanxi. 2020. (In Chinese)

2397 950 Ke, Y. The characteristics of soil CO<sub>2</sub>, N<sub>2</sub>O emissions in the hilly area of central Sichuan basin  
2398 typical farmland and forest and validation of DNDC model for the measurements. 2015. (In  
2399 Chinese)

2400 951 Xu, Y. Effects of different transformation measures on soil organic carbon in the *Pinus*  
2401 *massoniana* low-benefit forest in southern Sichuan. 2016. (In Chinese)

2402 952 Hao, K. Seasonal dynamic of soil labile organic carbon in spruce plantation different structural  
2403 adjustment in subalpine of western Sichuan. 2011. (In Chinese)

2404 953 Kang, C. Seasonal dynamics of soil labile Organic Carbon in spruce plantation different  
2405 structural adjustment in subalpine of western Sichuan. 2019. (In Chinese)

2406 954 Huang, H. Study on soil dissolved organic matter content under different land use types of  
2407 Longgu district in Chengdu. 2013. (In Chinese)

2408 955 Gong, C. Effects of altered carbon input on carbon emissions of the marshy wetlands and the  
2409 microbiological mechanisms. 2018. (In Chinese)

2410 956 Xin, F. The seasonal dynamics of soil respiration and microbial community with different  
2411 plantations regeneration way of *Cunninghamia lanceolata*. 2012. (In Chinese)

2412 957 Lin, X. Effects of tree species composition on soil carbon composition in poplar plantation.  
2413 2021. (In Chinese)

2414 958 Zhang, H. Annual variations of the active and recalcitrant organic carbons and the microbial  
2415 influences in saline-alkali farmland soil. 2017. (In Chinese)

2416 959 Liu, X. Farmland carbon pool composition and emissions characteristics of various land use  
2417 types in Fuzhou. 2020. (In Chinese)

- 2418 960 Du, C. Seasonal dynamics of soil microbial communities under different forest types in the  
2419 Xinjiangshan Forest Region of Qinling Mountains. 2018. (In Chinese)
- 2420 961 Xu, Y. Mechanisms of Greenhouse Gas Emissions and Soil Organic Carbon Dynamics from  
2421 Rice-rapeseed Rotation in Different Water-saving Irrigation Paddy Fields. 2016. (In Chinese)
- 2422 962 Huang, T. Effects of different soil and water loss control measures on surface runoff and soil  
2423 nutrients in camellia forest in purple soil region. 2018. (In Chinese)
- 2424 963 Du, L. CO<sub>2</sub> emission from red soil and its influence factors in mid-subtropical China. 2006. (In  
2425 Chinese)
- 2426 964 Li, S. Study on Resource Utilization Efficiency and Soil Environmental Effects of  
2427 Multi-cropping Planting System in Red Upland Soil. 2021. (In Chinese)
- 2428 965 Yang, F. Non-target effects of naphthalene on soil respiration and biochemical characteristics in  
2429 the subalpine forest of western Sichuan, China. 2018. (In Chinese)
- 2430 966 Li, X. Effects of Close-to-nature Forest Reconstruction on Distribution Patterns of Carbon  
2431 Storage in Young and Middle Age Forests in Ningbo Area. 2019. (In Chinese)
- 2432 967 Feng, X. Effects of under-forest economic model of *Pinus massoniana* on soil active carbon and  
2433 soil respiration in Changting. 2017. (In Chinese)
- 2434 968 Ma, T. Effect of thinning on soil nitrous oxide fluxes in *Pinus massoniana* Plantation. 2016. (In  
2435 Chinese)
- 2436 969 Zhou, Q. Seasonal dynamics characteristics of soil and litter nutrients in *Phoebe bournei*,  
2437 *Cunninghamia lanceolata* and its mixed plantation. 2020. (In Chinese)
- 2438 970 Huang, Q. Contribution and influencing factors of soil organic matter derived from  
2439 microorganism during the restoration process of *Pinus massoniana* forest. 2020. (In Chinese)
- 2440 971 Liu, J. Effects of simulated climate warming on soil carbon and nitrogen transformation in the  
2441 alpine forest of western Sichuan. 2012. (In Chinese)
- 2442 972 Wei, Y. Effects of Rice Cultivation on Peatland Soil Enzyme Activities. 2019. (In Chinese)
- 2443 973 Huo, L. The vertical distribution and stability of SOC in marsh before and after reclamation.  
2444 2013. (In Chinese)
- 2445 974 Zhang, W. Dynamic and factors of microbial biomass carbon and dissolved organic carbon in  
2446 Peatland. 2015. (In Chinese)
- 2447 975 Xiang W. The effect of biochars application on short-range ordered minerals in paddy soils. 2017.  
2448 (In Chinese)
