# Supplementary material for: Global patterns and drivers of soil dissolved organic carbon concentrations
Source: Copernicus journal article supplement (doi:10.5194/essd-2024-343), 2024-08-29
Supplement: Supplementary file [file essd-2024-343-AC1-supplement.pdf]

## **EDITING CERTIFICATE**

**Date:** December 12, 2024

**Manuscript Authors:** Tianjing Ren and Andong Cai

**Manuscript Title:** *Global patterns and drivers of soil dissolved organic carbon concentrations*

To whom it may concern,

I had the pleasure to perform English editing on the manuscript titled above. I am a native English speaker and hold a doctoral degree in the biological sciences.

I am confident that the English language in the manuscript is of a sufficient standard to warrant a consideration for peer review and/or publication. If needed, we look forward to making revisions as requested by the editor and/or reviewers.

Sincerely,

*Russell Doughty, PhD*

Russell Doughty, PhD  
Research Scientist  
Norman, Oklahoma, USA  
[russ@americanenglishediting.com](mailto:russ@americanenglishediting.com)  
<https://www.researchgate.net/profile/Russell-Doughty>
